# Supplementary material for: Benzothiazolium salts as reagents for the deoxygenative perfluoroalkylthiolation of alcohols
Source: publisher site journal article supplement (doi:10.3762/bjoc.17.8), 2021-01-08

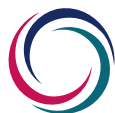

## Supporting Information

for

### **Benzothiazolium salts as reagents for the deoxygenative perfluoroalkylthiolation of alcohols**

Armin Ariamajd, Nils J. Gerwien, Benjamin Schwabe, Stefan Dix  
and Matthew N. Hopkinson

*Beilstein J. Org. Chem.* **2021**, *17*, 83–88. doi:10.3762/bjoc.17.8

## Experimental section

## Contents

|     |                                                                                                   |     |
|-----|---------------------------------------------------------------------------------------------------|-----|
| 1   | General Information                                                                               | S2  |
| 2   | Synthesis of BT-SR <sub>F</sub> Reagents                                                          | S3  |
| 2.1 | Perfluoroalkylation of MBT with Perfluoroalkyl Iodides                                            | S3  |
| 2.2 | <i>N</i> -Methylation of 2-((Perfluoroalkyl)thio)benzo[ <i>d</i> ]thiazoles 1                     | S6  |
| 3   | Scope and Limitations of the Deoxyperfluoroalkylthiolation of Alcohols                            | S9  |
| 3.1 | Deoxyperfluoroalkylation of 4-Nitrobenzyl alcohol (2a) with Different BT-SR <sub>F</sub> Reagents | S9  |
| 3.2 | Deoxypentafluoroethylation of Alcohols 2 with BT-SC <sub>2</sub> F <sub>5</sub>                   | S16 |
| 3.3 | Deoxyheptafluoropropylation of Alcohols 2 with BT-SC <sub>3</sub> F <sub>7</sub>                  | S21 |
| 4   | NMR Spectra of Novel Compounds                                                                    | S22 |

## 1 General Information

Solvents were purified either with the solvent purification system MB-SPS-800 (Braun) or by manual distillation over standard drying agents. The dried solvents were then stored over molecular sieves or transferred under argon. UVA light irradiation for the synthesis of the reagents was provided by a LED lamp ( $\lambda_{\text{max}} = 365 \text{ nm}$ , IP65). All compounds employed were purchased from commercial suppliers and used as received. The deoxygenative perfluoroalkylthiolation reactions were performed in round-bottom flasks under an atmosphere of air. Flash chromatography was performed using silica gel.

NMR spectra were acquired on a JEOL ECX 400 (400 MHz), JEOL ECP 500/ Bruker Avance 500 (500 MHz), Varian INOVA 600 (600 MHz) or a Bruker Avance 700 (700 MHz) in  $\text{CDCl}_3$  or  $\text{CD}_3\text{CN}$  as a solvent. Chemical shifts ( $\delta$ ) are quoted in ppm downfield of tetramethylsilane. The residual solvent signals were used as references for  $^1\text{H}$  and  $^{13}\text{C}$  NMR spectra.  $^{19}\text{F}$  NMR spectra are not calibrated by an internal reference and coupling constants ( $J_{\text{F-H}}$ ) where reported were determined from proton coupled  $^{19}\text{F}$  NMR studies. Coupling constants ( $J$ ) are quoted in Hz.  $^1\text{H}$  NMR yields where reported were measured using  $\text{CH}_2\text{Br}_2$  as an internal standard.

Mass spectra were obtained on a ESI-FTICR-MS: Ionspec QFT-7 (Agilent/Varian) or on a HR-EI-MS: Waters Autospec Premier with Agilent 7890B GC. Infrared spectra were measured on a Thermo Scientific Nicolet iS10 FT-IR Spectrometer. Characteristic absorption bands are displayed in wavenumbers  $\tilde{\nu}$  in  $\text{cm}^{-1}$  and were analyzed with the software Spectral Manager from JASCO.

## 2 Synthesis of BT-SR<sub>F</sub> Reagents

### 2.1 Perfluoroalkylation of MBT with Perfluoroalkyl Iodides

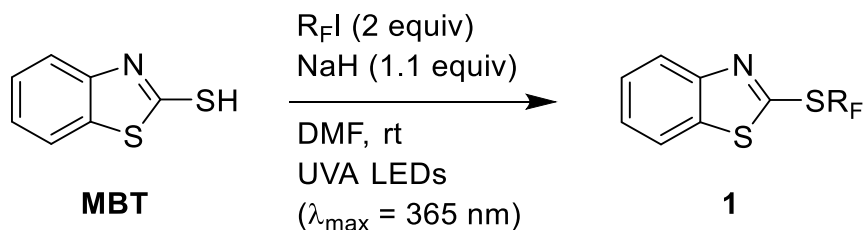

**General Procedure A:**<sup>1</sup> Mercaptobenzothiazole (1.0 equiv) was dissolved in DMF (0.16-0.25 M) under argon. Sodium hydride (60 wt % in mineral oil, 1.1 equiv) was added and the mixture was stirred at rt for 30 min. The perfluoroalkyl iodide (1.2 or 2 equiv) was then added (condensed in for I-C<sub>2</sub>F<sub>5</sub>) and the mixture was stirred under irradiation from UVA LEDs ( $\lambda_{\text{max}} = 365 \text{ nm}$ ) overnight. Water was added and the crude product was extracted with EtOAc (3×). The combined organic fractions were washed with water (3×), dried over anhydrous Na<sub>2</sub>SO<sub>4</sub> and concentrated in vacuo. Purification by column chromatography over silica gel afforded the 2-((perfluoroalkyl)thio)benzo[d]thiazole intermediate **1**.

#### 2-((Perfluoroethyl)thio)benzo[d]thiazole (**1a**)

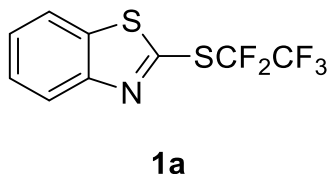

Prepared using General Procedure A with 2 equiv of I-C<sub>2</sub>F<sub>5</sub> on a 29.9 mmol scale. Pale yellow oil (5.21 g, 18.2 mmol, 61%).

**<sup>1</sup>H NMR (400 MHz, Chloroform-*d*)**  $\delta$  = 8.16 (dm,  $J = 8.1 \text{ Hz}$ , 1H), 7.90 (dm,  $J = 8.1 \text{ Hz}$ , 1H), 7.56 (ddd,  $J = 8.3, 7.2, 1.4 \text{ Hz}$ , 1H), 7.50 (t,  $J = 8.5, 7.2, 1.3 \text{ Hz}$ , 1H). **<sup>19</sup>F NMR (376 MHz, Chloroform-*d*)**  $\delta$  = -82.5 (t,  $J = 3 \text{ Hz}$ , 3F), -90.1 (q,  $J = 3 \text{ Hz}$ , 2F). **<sup>13</sup>C NMR (151 MHz, Chloroform-*d*)**  $\delta$  = 153.3 (C<sub>q</sub>), 150.0 (C<sub>q</sub>), 138.6 (C<sub>q</sub>), 127.2 (CH), 127.0 (CH), 124.5 (CH), 121.4 (CH), 119.7 (tq,  $J = 294, 42 \text{ Hz}$ , CF<sub>3</sub>), 118.4 (qt,  $J = 287, 36 \text{ Hz}$ , SCF<sub>2</sub>). **HRMS (ESI):**  $m/z$  calculated for [C<sub>9</sub>H<sub>5</sub>F<sub>5</sub>NS<sub>2</sub>]<sup>+</sup> ([M+H]<sup>+</sup>): 285.9778, measured: 285.9793. **IR (ATR):**  $\nu$  (cm<sup>-1</sup>): 3071, 2927, 1592, 1556, 1456, 1410, 1329, 1312, 1206, 1103, 1016, 994, 949, 853, 757, 751, 727, 708, 676, 651, 629, 608, 597, 550.

<sup>1</sup> Procedure adapted from: A. Harsányi, É. Dorkó, Á. Csapó, T. Bakó, C. Peltz, J. Rábai, *J. Fluorine Chem.* **2011**, *132*, 1241-1246.

## 2-((Perfluoropropyl)thio)benzo[d]thiazole (1b)

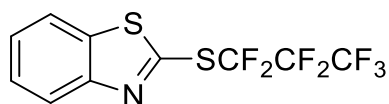

**1b**

Prepared using General Procedure A with 2 equiv of I-C<sub>3</sub>F<sub>7</sub> on a 10.0 mmol scale. Pale yellow oil (2.64 g, 7.87 mmol, 79%).

**<sup>1</sup>H NMR (600 MHz, Chloroform-*d*)**  $\delta$  = 8.16 (dd, *J* = 8.2, 0.8 Hz, 1H), 7.90 (d, *J* = 8.2, 0.9 Hz, 1H), 7.55 (ddd, *J* = 8.3, 7.2, 1.3 Hz, 1H), 7.50 (ddd, *J* = 8.3, 7.2, 1.3 Hz, 1H). **<sup>19</sup>F NMR (565 MHz, Chloroform-*d*)**  $\delta$  = -79.9 (t, *J* = 9 Hz, 3F), -85.8 (q, *J* = 9 Hz, 2F), -123.3 (m, 2F). **<sup>13</sup>C NMR (151 MHz, Chloroform-*d*)**  $\delta$  = 153.3 (C<sub>q</sub>), 149.9 (C<sub>q</sub>), 138.6 (C<sub>q</sub>), 127.2 (CH), 127.0 (CH), 124.5 (CH), 121.4 (CH), 122.1 (tt, *J* = 295, 34 Hz, SCF<sub>2</sub>), 117.6 (qt, *J* = 288, 34 Hz, CF<sub>3</sub>), 108.7 (tm, *J* = 266 Hz, CF<sub>2</sub>). **HRMS (EI)**: *m/z* calculated for [C<sub>10</sub>H<sub>4</sub>F<sub>7</sub>NS<sub>2</sub>]<sup>+</sup> ([M]<sup>+</sup>): 334.9668, measured: 334.9644. **IR (ATR)**:  $\nu$  (cm<sup>-1</sup>): 3068, 2927, 2854, 1556, 1456, 1410, 1335, 1313, 1208, 1185, 1115, 1091, 1040, 1016, 916, 846, 757, 741, 727, 708, 687, 674, 598.

## 2-((Perfluoropentyl)thio)benzo[d]thiazole (1c)

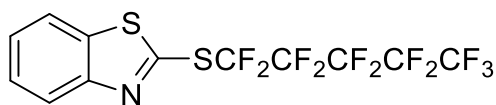

**1c**

Prepared using General Procedure A with 2 equiv of I-C<sub>5</sub>F<sub>11</sub> on a 6.0 mmol scale. Pale yellow oil (1.79 g, 4.11 mmol, 69%).

**<sup>1</sup>H NMR (600 MHz, Chloroform-*d*)**  $\delta$  = 8.16 (dm, *J* = 8.3 Hz, 1H), 7.90 (dm, *J* = 8.0 Hz, 1H), 7.56 (ddm, *J* = 8.3, 7.1 Hz, 1H), 7.50 (ddm, *J* = 8.1, 7.1 Hz, 1H). **<sup>19</sup>F NMR (565 MHz, Chloroform-*d*)**  $\delta$  = -80.8 (m, 3F), -84.9 (m, 2F), -119.0 (m, 2F), -122.2 (m, 2F), -126.1 (m, 2F). **<sup>13</sup>C NMR (151 MHz, Chloroform-*d*)**  $\delta$  = 153.3 (C<sub>q</sub>), 150.0 (C<sub>q</sub>), 138.7 (C<sub>q</sub>), 127.2 (CH), 127.1 (CH), 124.5 (CH), 121.4 (CH), 122.8 (tt, *J* = 297, 35 Hz, SCF<sub>2</sub>), 117.3 (qt, *J* = 286, 33 Hz, CF<sub>3</sub>), 110.7 (tm, *J* = 270 Hz, CF<sub>2</sub>) *Note: Two perfluoroalkyl <sup>13</sup>C peaks could not be observed.* **HRMS (EI)**: *m/z* calculated for [C<sub>12</sub>H<sub>4</sub>F<sub>11</sub>NS<sub>2</sub>]<sup>+</sup> ([M]<sup>+</sup>): 434.9604, measured: 434.9620. **IR (ATR)**:  $\nu$  (cm<sup>-1</sup>): 3065, 3046, 1552, 1456, 1410, 1357, 1314, 1271, 1232, 1199, 1136, 1111, 1086, 1075, 1017, 999, 941, 854, 813, 767, 761, 745, 722, 696, 682, 659, 619, 594, 570.

## 2-((Perfluorooctyl)thio)benzo[d]thiazole (1d)<sup>2</sup>

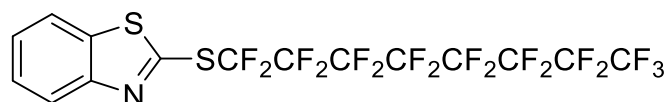

**1d**

Prepared using General Procedure A with 1.2 equiv of I-C<sub>8</sub>F<sub>17</sub> on a 3.0 mmol scale. White solid (1.67 g, 2.85 mmol, 95%).

**<sup>1</sup>H NMR (400 MHz, Chloroform-*d*)**  $\delta$  = 8.17 (dm, *J* = 8.3 Hz, 1H), 7.92 (dm, *J* = 8.1 Hz, 1H), 7.57 (m, 1H), 7.52 (m, 1H). **<sup>19</sup>F NMR (376 MHz, Chloroform-*d*)**  $\delta$  = -80.6 (t, *J* = 11 Hz, 3F), -84.8 (t, *J* = 15 Hz, 2F), -118.7 (m, 2F), -121.0 (m, 2F), -121.6 (m, 2F), -121.8 (m, 2F), -122.6 (m, 2F), -126.0 (m, 2F).

The data agree with literature precedents.<sup>2</sup>

## 2-((Perfluoropropan-2-yl)thio)benzo[d]thiazole (1e)

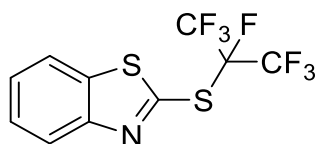

**1e**

Prepared using General Procedure A with 1.2 equiv of I-CF(CF<sub>3</sub>)<sub>2</sub> on a 14.1 mmol scale. Pale yellow oil (4.30 g, 12.8 mmol, 91%).

**<sup>1</sup>H NMR (400 MHz, Chloroform-*d*)**  $\delta$  = 8.16 (dm, *J* = 8.2 Hz, 1H), 7.88 (dm, *J* = 7.9 Hz, 1H), 7.54 (ddd, *J* = 8.2, 7.3, 1.4 Hz, 1H), 7.48 (ddd, *J* = 8.0, 7.2, 1.3 Hz, 1H). **<sup>19</sup>F NMR (376 MHz, Chloroform-*d*)**  $\delta$  = -73.9 (d, *J* = 10 Hz, 6F), -155.6 (sept, *J* = 11 Hz, 1F). **<sup>13</sup>C NMR (101 MHz, Chloroform-*d*)**  $\delta$  = 153.2 (C<sub>q</sub>), 149.9 (C<sub>q</sub>), 138.8 (C<sub>q</sub>), 127.1 (CH), 127.1 (CH, two overlapping peaks), 124.6 (CH), 121.4 (CH), 120.1 (qd, *J* = 288, 29 Hz, CF<sub>3</sub>), 98.1 (d(sept), *J* = 255, 35 Hz, CF). **HRMS (EI):** *m/z* calculated for [C<sub>10</sub>H<sub>4</sub>F<sub>7</sub>NS<sub>2</sub>]<sup>+</sup> ([M]<sup>+</sup>): 334.9668, measured: 334.9688. **IR (ATR):**  $\nu$  (cm<sup>-1</sup>): 3068, 2927, 2854, 1555, 1456, 1409, 1281, 1263, 1219, 1170, 1134, 1092, 992, 959, 934, 853, 755, 728, 717, 676, 619, 589, 602, 551.

<sup>2</sup> D. E. Yerien, S. Barata-Vallejo, B. Camps, A. E. Cristófaló, M. E. Cano, M. L. Uhrig, A. Postigo, *Catal. Sci. Technol.* **2017**, *7*, 2274-2282.

## 2.2 N-Methylation of 2-((Perfluoroalkyl)thio)benzo[d]thiazoles **1**

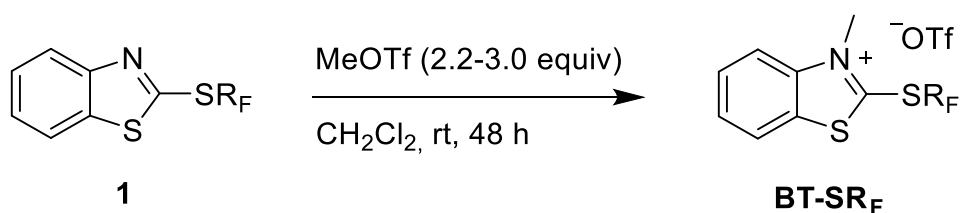

**General Procedure B:** 2-Substituted benzothiazoles (1.0 equiv) were dissolved in dry CH<sub>2</sub>Cl<sub>2</sub> (0.10 M) and methyl trifluoromethanesulfonate (2.2-3.0 equiv) was added. The reaction mixture was stirred at rt for 48 h and the product was precipitated with diethyl ether. The suspension was then filtered, and the residue washed with diethyl ether (3×). After drying in vacuo, **BT-SR<sub>F</sub>** salts were obtained as off-white solids.

### 3-Methyl-2-((perfluoroethyl)thio)benzo[d]thiazol-3-ium trifluoromethanesulfonate (**BT-SC<sub>2</sub>F<sub>5</sub>**)

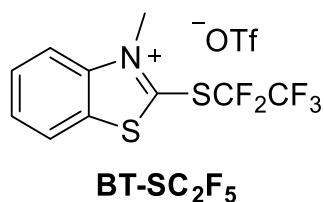

Prepared from **1a** using General Procedure B with 2.2 equiv of MeOTf on a 16.3 mmol scale. Off-white solid (6.70 g, 14,9 mmol, 91%).

**<sup>1</sup>H NMR (400 MHz, Acetonitrile-*d*<sub>3</sub>)** δ = 8.40 (dm, *J* = 8.3 Hz, 1H), 8.29 (dm, *J* = 8.8 Hz, 1H), 8.07 (ddm, *J* = 8.6, 7.2 Hz, 1H), 7.99 (ddm, *J* = 8.4, 7.2 Hz, 1H), 4.47 (s, 3H). **<sup>19</sup>F NMR (565 MHz, Acetonitrile-*d*<sub>3</sub>)** δ = -78.5 (3F), -82.0 (t, *J* = 3 Hz, 3F), -87.8 (q, *J* = 3 Hz, 2F). **<sup>13</sup>C NMR (151 MHz, Acetonitrile-*d*<sub>3</sub>)** δ = 158.6 (C<sub>q</sub>), 143.9 (C<sub>q</sub>), 134.6 (C<sub>q</sub>), 132.5 (CH), 131.7 (CH), 125.3 (CH), 122.0 (q, *J* = 322 Hz, SO<sub>2</sub>CF<sub>3</sub>), 119.9 (tq, *J* = 299 Hz, 42, CF<sub>3</sub>), 119.6 (CH), 118.7 (qt, *J* = 286 Hz, 35, SCF<sub>2</sub>), 40.2 (CH<sub>3</sub>). **HRMS (ESI):** *m/z* calculated for [C<sub>10</sub>H<sub>7</sub>F<sub>5</sub>NS<sub>2</sub>]<sup>+</sup> ([M-OTf]<sup>+</sup>): 299.9935, measured: 299.9948. **IR (ATR):** ν (cm<sup>-1</sup>): 3092, 3028, 1578, 1491, 1463, 1433, 1383, 1330, 1278, 1267, 1241, 1211, 1160, 1337, 1111, 1207, 955, 815, 160, 150, 722, 714, 658, 638, 602, 573.

### 3-Methyl-2-((perfluoropropyl)thio)benzo[d]thiazol-3-ium trifluoromethanesulfonate (**BT-SC<sub>3</sub>F<sub>7</sub>**)

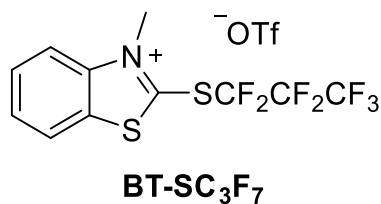

Prepared from **1b** using General Procedure B with 3.0 equiv of MeOTf on a 5.25 mmol scale. Off-white solid (2.46 g, 4.92 mmol, 94%).

**<sup>1</sup>H NMR (400 MHz, Acetonitrile-*d*<sub>3</sub>)** δ = 8.39 (d, *J* = 8.5 Hz, 1H), 8.27 (d, *J* = 8.8 Hz, 1H), 8.04 (t, *J* = 8.0 Hz, 1H), 7.96 (t, *J* = 7.8 Hz, 1H), 4.45 (s, 3H). **<sup>19</sup>F NMR (376 MHz, Acetonitrile-*d*<sub>3</sub>)** δ = -79.2 (3F), -80.5 (t, *J* = 9 Hz, 3F), -83.8 (q, *J* = 9 Hz, 2F), -123.2 (m, 2F). **<sup>13</sup>C NMR (176 MHz, Acetonitrile-*d*<sub>3</sub>)** δ = 158.7 (C<sub>q</sub>), 144.1 (C<sub>q</sub>), 134.7 (C<sub>q</sub>), 132.6 (CH), 131.8 (CH), 125.3 (CH), 122.5 (tt, *J* = 299, 35 Hz, SCF<sub>2</sub>), 122.0 (q, *J* = 320 Hz, SO<sub>2</sub>CF<sub>3</sub>), 118.3 (qt, *J* = 288, 34 Hz, CF<sub>3</sub>), 119.7 (CH), 109.4 (tm, *J* = 267 Hz, CF<sub>2</sub>), 40.3 (CH<sub>3</sub>). **HRMS (ESI):** *m/z* calculated for [C<sub>11</sub>H<sub>7</sub>F<sub>7</sub>NS<sub>2</sub>]<sup>+</sup> ([M-OTf]<sup>+</sup>): 349.9903, measured: 349.9922. **IR (ATR):** *v* (cm<sup>-1</sup>): 3089, 3031, 1578, 1490, 1463, 1433, 1382, 1340, 1277, 1239, 1266, 1218, 1189, 1163, 1163, 1121, 1054, 1027, 914, 848, 815, 761, 751, 743, 723, 714, 687, 639, 574.

### 3-Methyl-2-((perfluoropentyl)thio)benzo[d]thiazol-3-ium trifluoromethanesulfonate (BT-SC<sub>5</sub>F<sub>11</sub>)

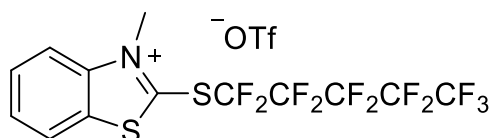

**BT-SC<sub>5</sub>F<sub>11</sub>**

Prepared from **1c** using General Procedure B with 2.5 equiv of MeOTf on a 3.68 mmol scale. Off-white solid (2.07 g, 3.45 mmol, 94%).

**<sup>1</sup>H NMR (400 MHz, Acetonitrile-*d*<sub>3</sub>)** δ = 8.42 (d, *J* = 8.3 Hz, 1H), 8.31 (d, *J* = 8.6 Hz, 1H), 8.07 (t, *J* = 8.0 Hz, 1H), 8.00 (t, *J* = 7.8 Hz, 1H), 4.48 (s, 3H). **<sup>19</sup>F NMR (376 MHz, Acetonitrile-*d*<sub>3</sub>)** δ = -79.2 (3F), -81.4 (t, *J* = 10 Hz, 3F), -82.7 (t, *J* = 14 Hz, 2F), -118.8 (m, 2F), -122.5 (m, 2F), -126.5 (m, 2F). **<sup>13</sup>C NMR (151 MHz, Acetonitrile-*d*<sub>3</sub>)** δ = 159.6 (C<sub>q</sub>), 144.0 (C<sub>q</sub>), 134.7 (C<sub>q</sub>), 132.6 (CH), 131.8 (CH), 125.3 (CH), 123.1 (tt, *J* = 300, 35 Hz, SCF<sub>2</sub>), 122.0 (q, *J* = 320 Hz, SO<sub>2</sub>CF<sub>3</sub>), 119.6 (CH), 118.0 (qt, *J* = 289, 33 Hz, CF<sub>3</sub>), 111.3 (tm, *J* = 267 Hz, CF<sub>2</sub>), 40.2 (CH<sub>3</sub>) *Note: Two perfluoroalkyl <sup>13</sup>C peaks could not be observed.* **HRMS (ESI):** *m/z* calculated for [C<sub>13</sub>H<sub>7</sub>F<sub>11</sub>NS<sub>2</sub>]<sup>+</sup> ([M-OTf]<sup>+</sup>): 449.9839, measured: 449.9843. **IR (ATR):** *v* (cm<sup>-1</sup>): 3101, 3031, 1577, 1490, 1462, 1433, 1357, 1277, 1266, 1241, 1224, 1201, 1163, 1142, 1081, 1028, 941, 863, 847, 815, 762, 737, 722, 697, 664, 639, 597, 572.

### 3-Methyl-2-((perfluorooctyl)thio)benzo[d]thiazol-3-ium trifluoromethanesulfonate (BT-SC<sub>8</sub>F<sub>17</sub>)

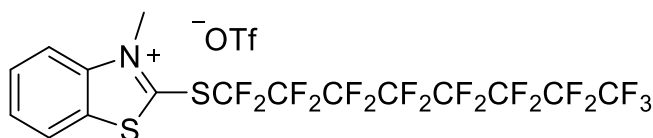

**BT-SC<sub>8</sub>F<sub>17</sub>**

Prepared from **1d** using General Procedure B with 3.0 equiv of MeOTf on a 1.57 mmol scale. Off-white solid (1.08 g, 1.44 mmol, 92%).

**<sup>1</sup>H NMR (400 MHz, Acetonitrile-*d*<sub>3</sub>)** δ = 8.40 (d, *J* = 8.4 Hz, 1H), 8.29 (d, *J* = 8.7 Hz, 1H), 8.07 (t, *J* = 7.6 Hz, 1H), 7.99 (t, *J* = 7.8 Hz, 1H), 4.47 (s, 3H). **<sup>19</sup>F NMR (376 MHz, Acetonitrile-*d*<sub>3</sub>)** δ = -79.3 (3F), -81.4 (t, *J* = 10 Hz, 3F), -82.5 (t, *J* = 14 Hz, 2F), -118.5 (m, 2F), -121.4 (m, 2F), -121.5 (m, 2F), -122.2 (m, 2F), -123.0 (m, 2F), -126.5 (m, 2F). **<sup>13</sup>C NMR (176 MHz, Acetonitrile-*d*<sub>3</sub>)** δ = 158.5 (C<sub>q</sub>), 143.9 (C<sub>q</sub>), 134.7



(C<sub>q</sub>), 132.6 (CH), 131.8 (CH), 125.3 (CH), 123.1 (tt, *J* = 300, 35 Hz, SCF<sub>2</sub>), 122.0 (q, *J* = 318 Hz, SO<sub>2</sub>CF<sub>3</sub>), 119.6 (CH), 118.0 (qt, *J* = 288, 32 Hz, CF<sub>3</sub>), 111.6 (m, several overlapping peaks, CF<sub>2</sub>), 40.2 (CH<sub>3</sub>) *Note: Several perfluoroalkyl* <sup>13</sup>C peaks could not be assigned. **HRMS (ESI):** *m/z* calculated for [C<sub>16</sub>H<sub>7</sub>F<sub>17</sub>NS<sub>2</sub>]<sup>+</sup> ([M-OTf]<sup>+</sup>): 599.9743, measured: 599.9730. **IR (ATR):** *v* (cm<sup>-1</sup>): 3101, 2361, 1576, 1490, 1461, 1435, 1370, 1328, 1281, 1251, 1200, 1149, 1134, 1097, 1054, 1031, 958, 930, 849, 816, 798, 768, 756, 741, 723, 714, 707, 655.

### 3-Methyl-2-((perfluoroisopropyl)thio)benzo[d]thiazol-3-ium trifluoromethanesulfonate (BT-SCF(CF<sub>3</sub>)<sub>2</sub>)

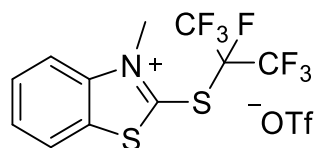

**BT-SCF(CF<sub>3</sub>)<sub>2</sub>**

Prepared from **1e** using General Procedure B with 3.0 equiv of MeOTf on a 12.8 mmol scale. Off-white solid (3.73 g, 10.7 mmol, 83%).

**<sup>1</sup>H NMR (700 MHz, Acetonitrile-*d*<sub>3</sub>)**  $\delta$  = 8.43 (ddd, *J* = 8.4, 1.2, 0.7 Hz, 1H), 8.33 (dt, *J* = 8.7, 0.9 Hz, 1H), 8.07 (ddd, *J* = 8.6, 7.2, 1.2 Hz, 1H), 7.99 (ddd, *J* = 8.3, 7.2, 1.0 Hz, 1H), 4.51 (s, 3H). **<sup>19</sup>F NMR (376 MHz, Acetone-*d*<sub>6</sub>)**  $\delta$  = -74.7 (d, *J* = 11 Hz, 6F), -78.9 (3F), -154.7 (sept, *J* = 11 Hz, 1F). **<sup>13</sup>C NMR (177 MHz, Acetonitrile-*d*<sub>3</sub>)**  $\delta$  = 158.3 (C<sub>q</sub>), 143.8 (C<sub>q</sub>), 134.8 (C<sub>q</sub>), 132.7 (CH), 132.0 (CH), 125.4 (CH), 122.0 (q, *J* = 321 Hz, SO<sub>2</sub>CF<sub>3</sub>), 120.4 (qd, *J* = 289, 28 Hz, CF<sub>3</sub>), 119.7 (CH), 98.4 (d(sept), *J* = 260, 36 Hz, CF), 40.4 (CH<sub>3</sub>). **HRMS (ESI):** *m/z* calculated for [C<sub>11</sub>H<sub>7</sub>F<sub>7</sub>NS<sub>2</sub>]<sup>+</sup> ([M-OTf]<sup>+</sup>): 349.9903, measured: 349.9923. **IR (ATR):** *v* (cm<sup>-1</sup>): 3086, 3031, 1579, 1491, 1463, 1432, 1382, 1276, 1240, 1221, 1178, 1159, 1139, 1099, 1027, 965, 937, 814, 755, 720, 638, 572, 540.

### 3 Scope and Limitations of the Deoxyperfluoroalkylthiolation of Alcohols

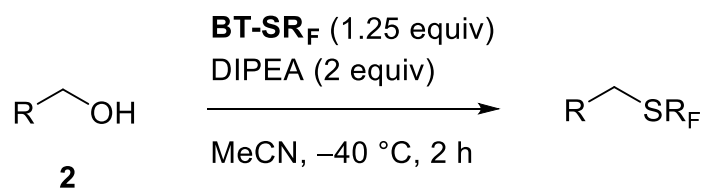

**General Procedure C:** The alcohol (0.50 mmol, 1.0 equiv) was dissolved in MeCN (0.17 M), **BT-SR<sub>F</sub>** (0.625 mmol, 1.25 equiv) was added and the reaction mixture was cooled to  $-40^\circ\text{C}$ .  $\text{NEt}(\text{iPr})_2$  (174  $\mu\text{L}$ , 1.0 mmol, 2.0 equiv) was then added dropwise and the reaction mixture was stirred for 1-2 h at  $-40^\circ\text{C}$ . The reaction mixture was concentrated in vacuo and purified by column chromatography over silica gel.

#### 3.1 Deoxyperfluoroalkylation of 4-Nitrobenzyl alcohol (**2a**) with Different **BT-SR<sub>F</sub>** Reagents

##### 3.1.1 With **BT-SC<sub>2</sub>F<sub>5</sub>**

a) At rt (DIPEA added at  $0^\circ\text{C}$  then reaction warmed to rt over 2 h)

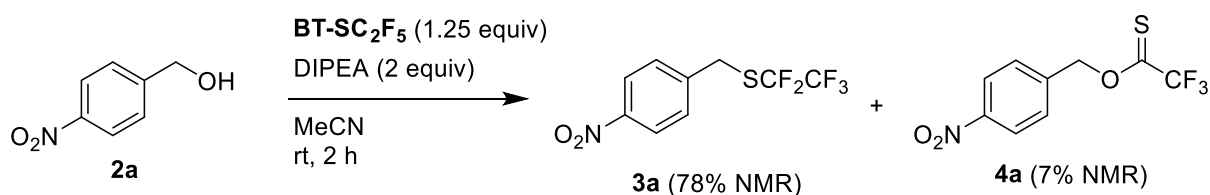

**Crude <sup>1</sup>H NMR Spectrum:** 0.5 mmol scale,  $\text{CH}_2\text{Br}_2$  (0.1 mmol) as internal reference

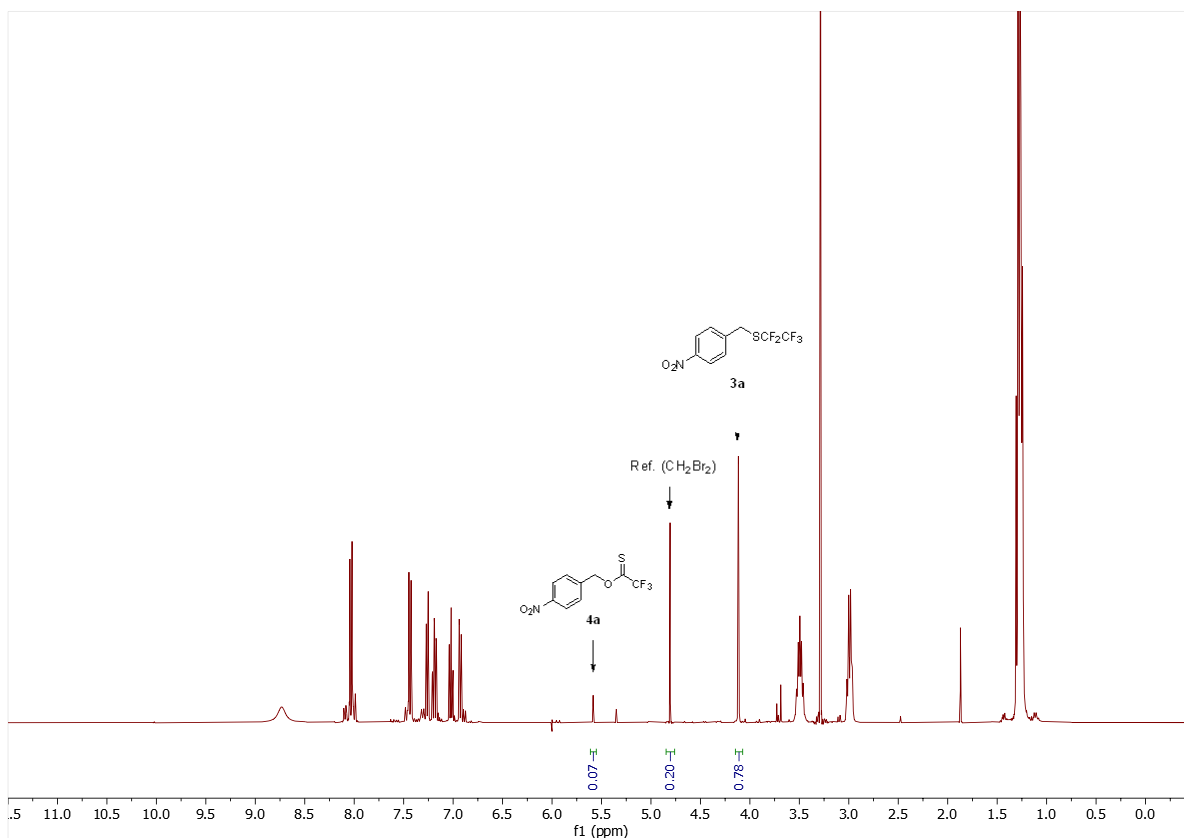

**b) At -40 °C (General Procedure C)**

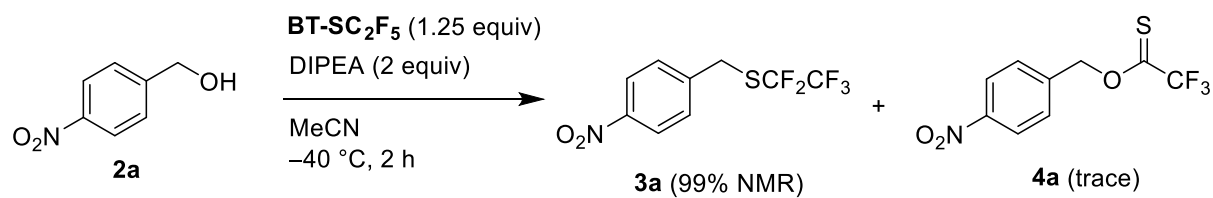

**Crude  $^1\text{H}$  NMR Spectrum:** 0.5 mmol scale,  $\text{CH}_2\text{Br}_2$  (0.1 mmol) as internal reference

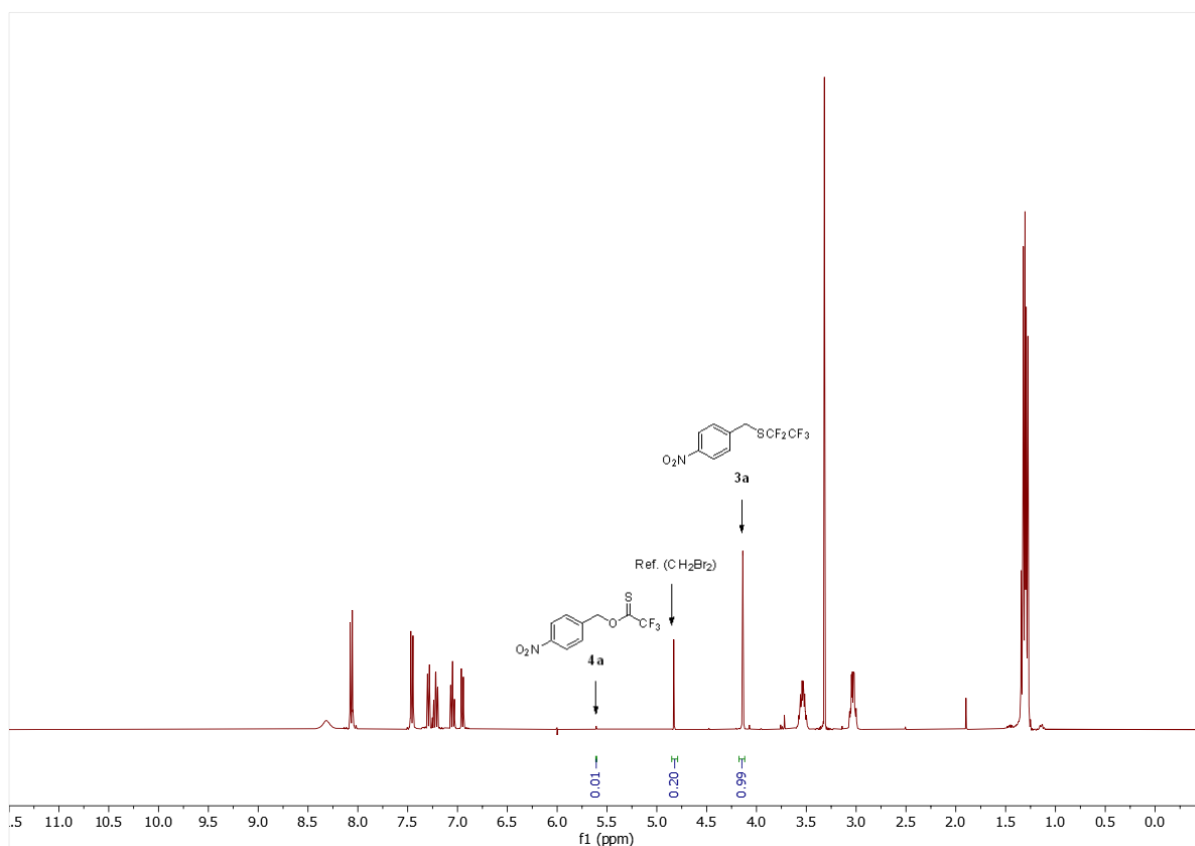

### (4-Nitrobenzyl)(perfluoroethyl)sulfane (3a)

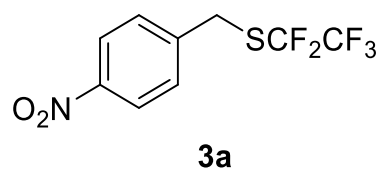

Prepared from 4-nitrobenzyl alcohol (**2a**) and BT-SC<sub>2</sub>F<sub>5</sub> using General Procedure C. Yellow liquid (131 mg, 0.46 mmol, 91%).

**<sup>1</sup>H NMR (600 MHz, Chloroform-*d*)**  $\delta$  = 8.20 (d, *J* = 8.6 Hz, 2H), 7.53 (d, *J* = 8.6 Hz, 2H), 4.21 (s, 2H). **<sup>19</sup>F NMR (565 MHz, Chloroform-*d*)**  $\delta$  = -83.3 (m, 3F), -92.0 (m, 2F). **<sup>13</sup>C NMR (151 MHz, Chloroform-*d*)**  $\delta$  = 147.8 (C<sub>q</sub>), 142.7 (C<sub>q</sub>), 130.0 (CH), 124.2 (CH), 121.3 (tq, *J* = 289, 41 Hz, CF<sub>2</sub>), 118.5 (qt, *J* = 286, 36 Hz, CF<sub>3</sub>), 32.2 (t, *J* = 4 Hz, CH<sub>2</sub>). **HRMS (ESI)**: *m/z* calculated for [C<sub>9</sub>H<sub>5</sub>F<sub>5</sub>NO<sub>2</sub>S]<sup>-</sup> ([M-H]<sup>-</sup>): 285.9967, measured: 285.9967. **IR (ATR)**:  $\nu$  (cm<sup>-1</sup>): 3117, 3093, 2952, 2860, 1602, 1521, 1346, 1323, 1254, 1205, 1095, 1016, 966, 889, 858, 819, 802, 750, 706, 642, 624, 590, 551.

### 3.1.2 With BT-SC<sub>3</sub>F<sub>7</sub>

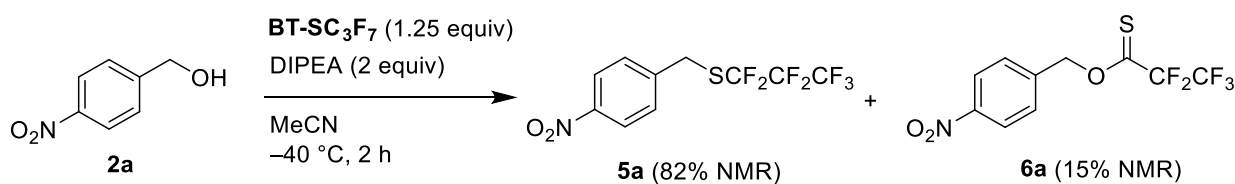

Crude <sup>1</sup>H NMR Spectrum: 0.5 mmol scale, CH<sub>2</sub>Br<sub>2</sub> (0.5 mmol) as internal reference

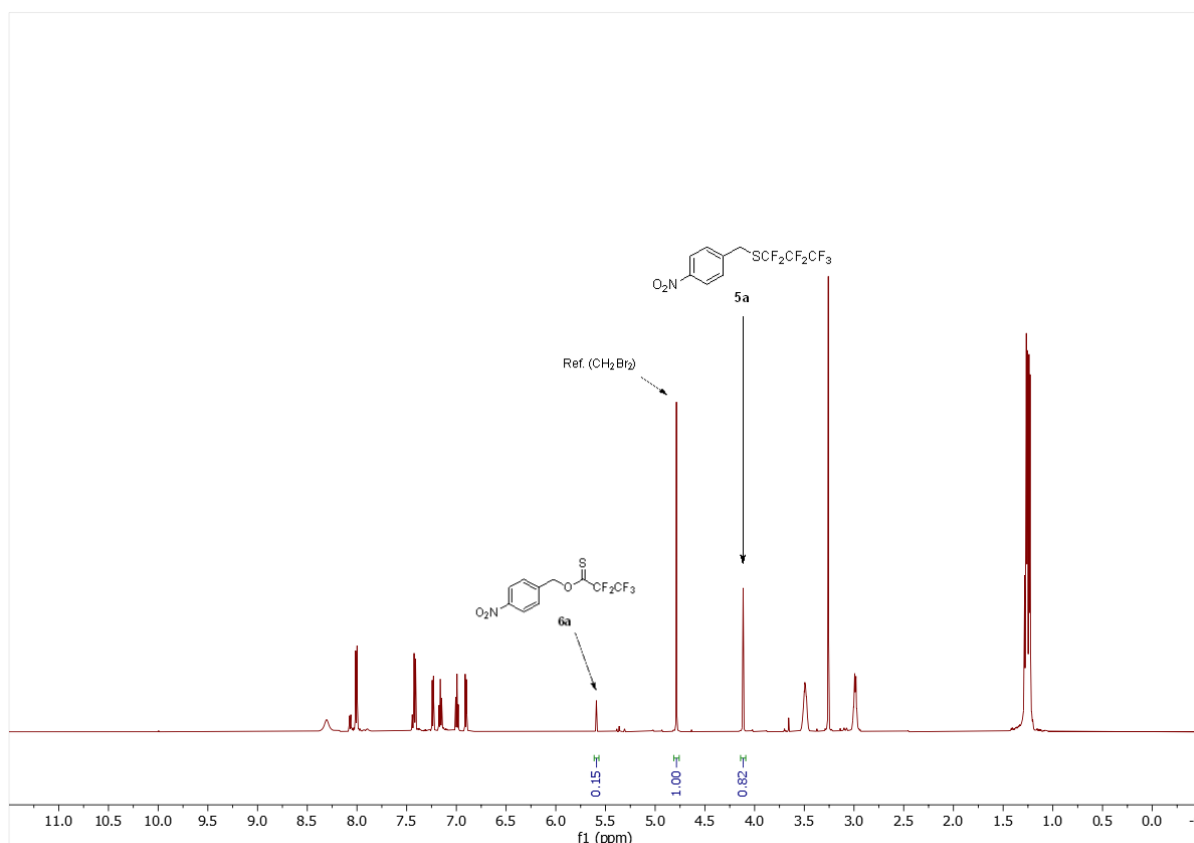

#### (4-Nitrobenzyl)(perfluoropropyl)sulfane (**5a**)

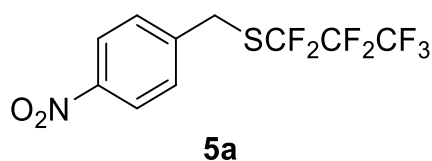

Prepared from 4-nitrobenzyl alcohol (**2a**) and BT-SC<sub>3</sub>F<sub>7</sub> using General Procedure C. Yellow solid (139 mg, 0.412 mmol, 82%).

**<sup>1</sup>H NMR (400 MHz, Chloroform-*d*)**  $\delta$  = 8.21 (dm, *J* = 8.7 Hz, 2H), 7.55 (dm, *J* = 8.7 Hz, 2H), 4.24 (s, 2H). **<sup>19</sup>F NMR (377 MHz, Chloroform-*d*)**  $\delta$  = -80.0 (t, *J* = 10 Hz, 3F), -88.0 (qt, *J* = 9, 4 Hz, 2F), -124.0 (t, *J* = 4 Hz, 2F). **<sup>13</sup>C NMR (177 MHz, Chloroform-*d*)**  $\delta$  = 147.8 (C<sub>q</sub>), 142.8 (C<sub>q</sub>), 130.1 (CH), 124.3 (CH), 123.8 (tt, *J* = 290, 34 Hz, SCF<sub>2</sub>), 117.7 (qt, *J* = 288, 34 Hz, CF<sub>3</sub>), 108.6 (tm, *J* = 265 Hz, CF<sub>2</sub>), 32.3 (t, *J* = 4 Hz, CH<sub>2</sub>). **HRMS (EI)**: *m/z* calculated for [C<sub>10</sub>H<sub>6</sub>F<sub>7</sub>NO<sub>2</sub>S]<sup>+</sup> ([M]<sup>+</sup>): 337.0002, measured: 337.0004. **IR (ATR)**:  $\nu$  (cm<sup>-1</sup>): 3083, 2929, 2857, 1931, 1726, 1602, 1522, 1494, 1424, 1346, 1208, 1182, 1109, 1087, 1038, 1017, 926, 890, 855, 801, 751, 742, 717, 706, 678, 653, 631, 622, 606.

### 3.1.3 With BT-SC<sub>5</sub>F<sub>11</sub>

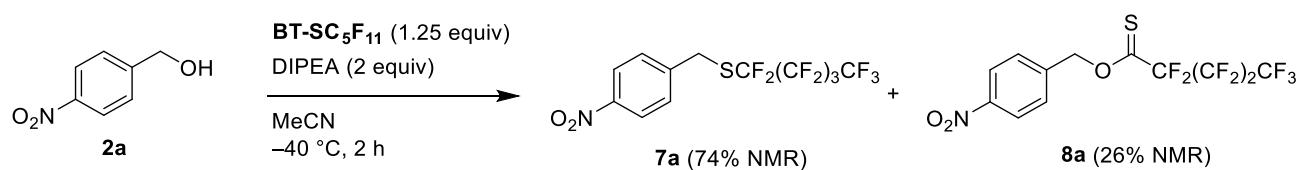

Crude <sup>1</sup>H NMR Spectrum: 0.5 mmol scale, CH<sub>2</sub>Br<sub>2</sub> (0.5 mmol) as internal reference

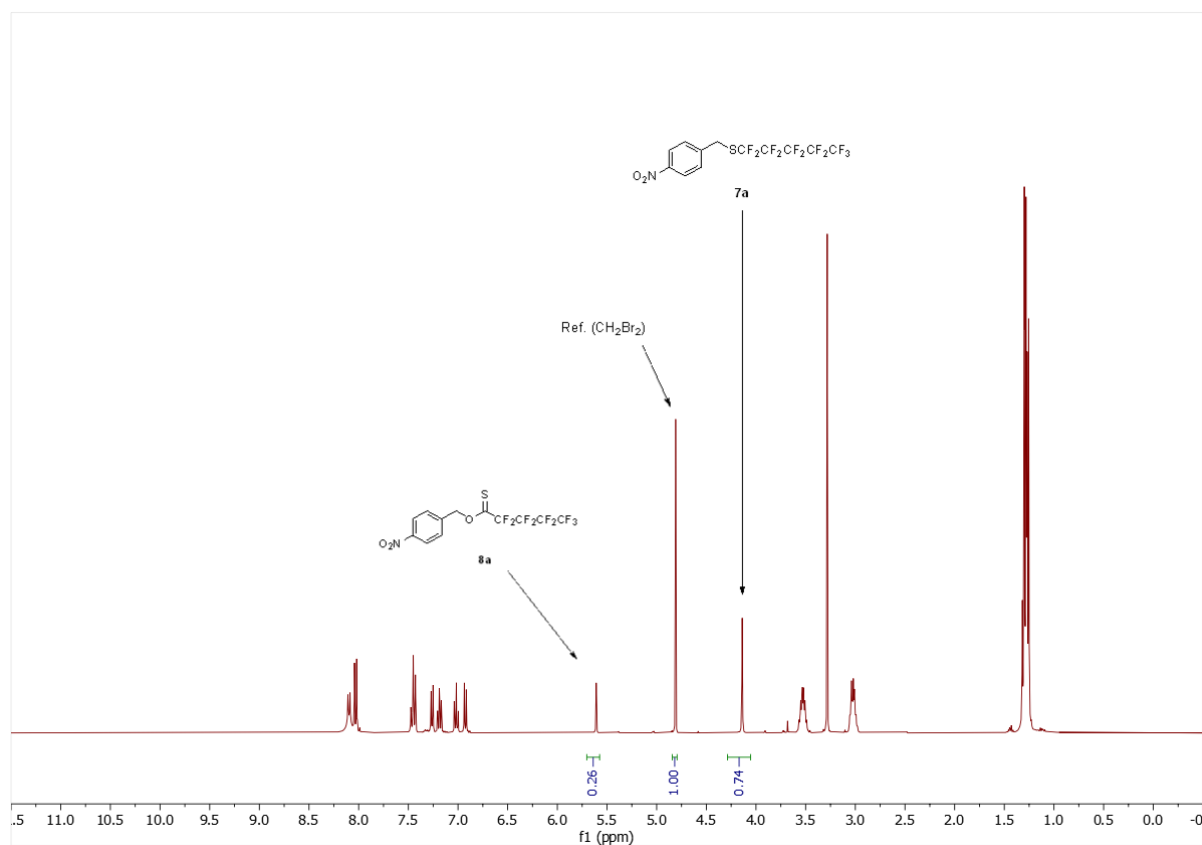

### 3.1.4 With BT-SC<sub>8</sub>F<sub>17</sub>

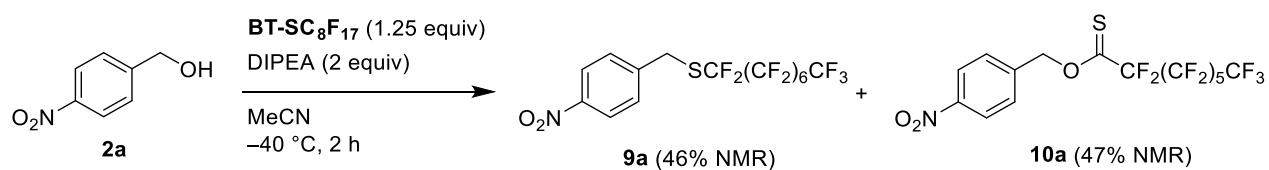

Crude <sup>1</sup>H NMR Spectrum: 0.5 mmol scale, CH<sub>2</sub>Br<sub>2</sub> (0.5 mmol) as internal reference

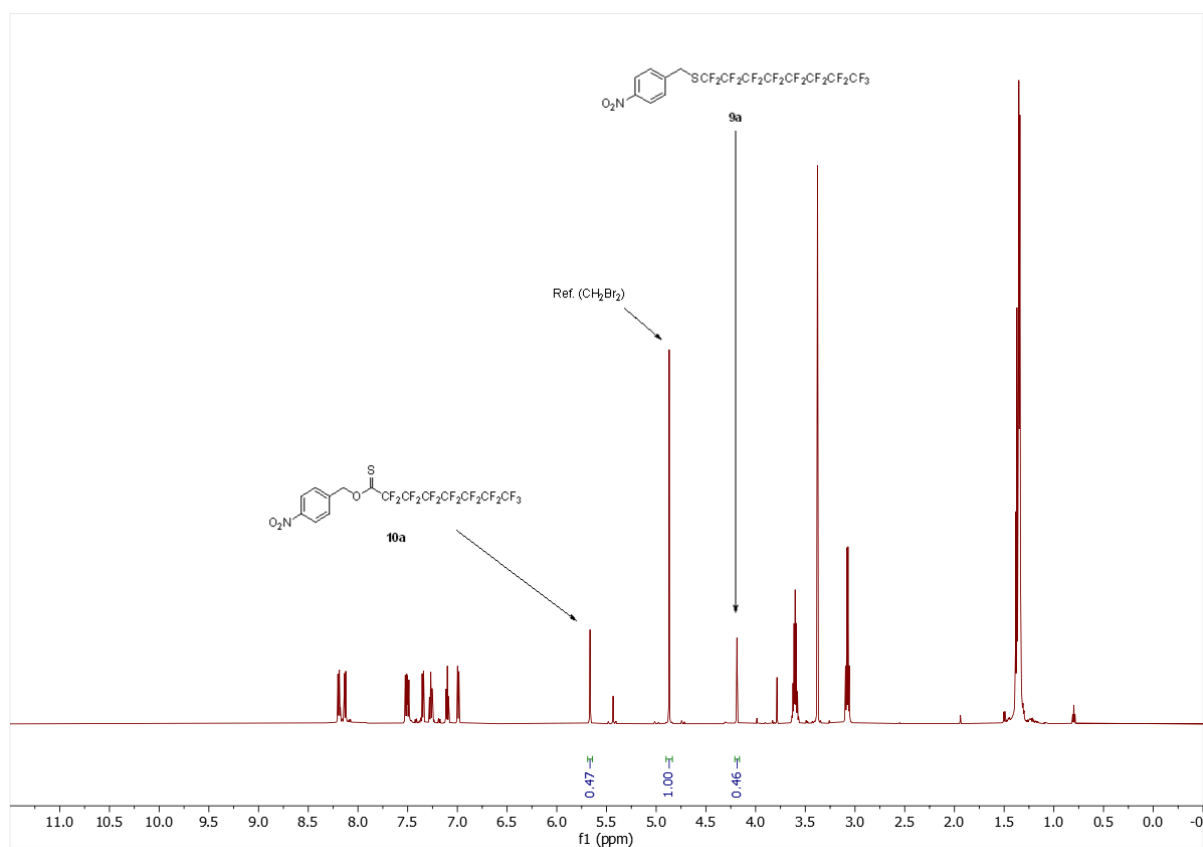

### 3.1.5 With BT-SCF(CF<sub>3</sub>)<sub>2</sub>

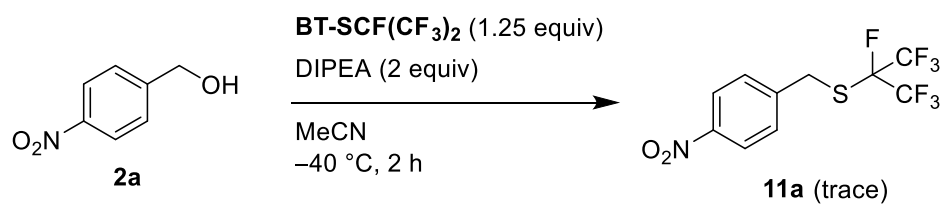

Crude <sup>1</sup>H NMR Spectrum: 0.5 mmol scale, CH<sub>2</sub>Br<sub>2</sub> (0.5 mmol) as internal reference

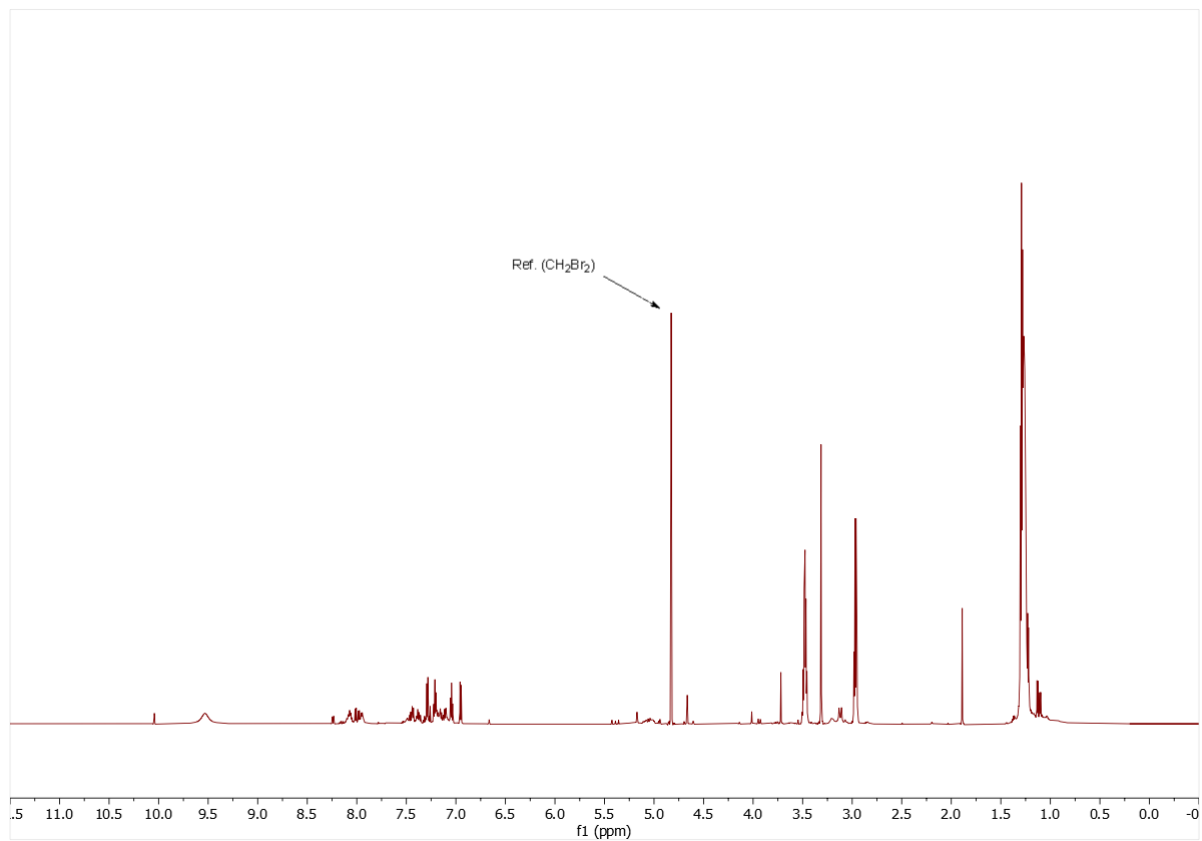



### 3.2 Deoxypentafluoroethylation of Alcohols **2** with BT-SC<sub>2</sub>F<sub>5</sub>

#### (Benzyl)(perfluoroethyl)sulfane (**3b**)<sup>3</sup>

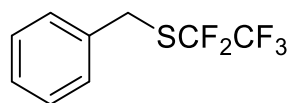

**3b**

Prepared from benzyl alcohol (**2b**) and BT-SC<sub>2</sub>F<sub>5</sub> using General Procedure C. Pale yellow liquid (88 mg, 0.36 mmol, 73%).

<sup>1</sup>H NMR (400 MHz, Chloroform-*d*)  $\delta$  = 7.29 – 7.38 (m, 5H), 4.17 (s, 2H). <sup>19</sup>F NMR (377 MHz, Chloroform-*d*)  $\delta$  = -83.3 (t, *J* = 4 Hz, 3F), -92.3 (t, *J* = 4 Hz, 2F).

The data agree with literature precedents.<sup>3</sup>

#### (4-Iodobenzyl)(perfluoroethyl)sulfane (**3c**)

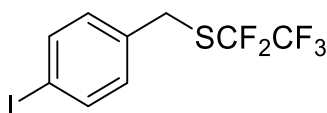

**3c**

Prepared from 4-iodobenzyl alcohol (**2c**) and BT-SC<sub>2</sub>F<sub>5</sub> using General Procedure C. Yellow liquid (140 mg, 0.38 mmol, 76%).

<sup>1</sup>H NMR (400 MHz, Chloroform-*d*)  $\delta$  = 7.69 (dm, *J* = 8.5 Hz, 2H), 7.10 (dm, *J* = 8.5 Hz, 2H), 7.30 (m, 1H), 4.09 (s, 2H). <sup>19</sup>F NMR (376 MHz, Chloroform-*d*)  $\delta$  = -83.2 (t, *J* = 4 Hz, 3F), -92.2 (q, *J* = 4 Hz, 2F). <sup>13</sup>C NMR (101 MHz, Chloroform-*d*)  $\delta$  = 138.2 (CH), 134.6 (C<sub>q</sub>), 131.0 (CH), 121.4 (tq, *J* = 288, 41 Hz, CF<sub>2</sub>), 118.7 (qt, *J* = 286, 37 Hz, CF<sub>3</sub>), 92.8 (C<sub>q</sub>), 32.6 (t, *J* = 4 Hz, CH<sub>2</sub>). HRMS (EI): *m/z* calculated for [C<sub>9</sub>H<sub>6</sub>F<sub>5</sub>S]<sup>+</sup> ([M]<sup>+</sup>): 367.9150, measured: 367.9176. IR (ATR):  $\nu$  (cm<sup>-1</sup>): 3040, 2946, 1906, 1588, 1485, 1400, 1322, 1205, 1094, 1060, 1008, 966, 878, 827, 809, 750, 736, 676, 642, 624, 598, 551.

<sup>3</sup> Q. Glenadel, M. Bordy, S. Alazet, A. Tlili, T. Billard, *Asian J. Org. Chem.* **2016**, *5*, 428-433.

**(Perfluoroethyl)(2,4,6-trichlorobenzyl)sulfane (3d)**

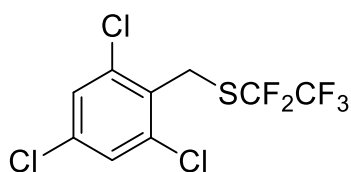

**3d**

Prepared from 2,4,6-trichlorobenzyl alcohol (**2d**) and BT-SC<sub>2</sub>F<sub>5</sub> using General Procedure C. Colourless liquid (166 mg, 0.48 mmol, 96%).

**<sup>1</sup>H NMR (400 MHz, Chloroform-*d*)**  $\delta$  = 7.37 (s, 2H), 4.44 (s, 2H). **<sup>19</sup>F NMR (376 MHz, Chloroform-*d*)**  $\delta$  = -83.1 (t, *J* = 4 Hz, 3F), -92.2 (q, *J* = 4 Hz, 2F). **<sup>13</sup>C NMR (101 MHz, Chloroform-*d*)**  $\delta$  = 136.6 (C<sub>q</sub>), 135.3 (C<sub>q</sub>), 130.1 (C<sub>q</sub>), 128.8 (CH), 121.5 (tq, *J* = 288, 41 Hz, CF<sub>2</sub>), 118.7 (qt, *J* = 286, 37 Hz, CF<sub>3</sub>), 28.2 (t, *J* = 4 Hz, CH<sub>2</sub>). **HRMS (EI):** *m/z* calculated for [C<sub>9</sub>H<sub>4</sub>Cl<sub>3</sub>F<sub>5</sub>S]<sup>+</sup> ([M]<sup>+</sup>): 343.9014, measured: 343.9037. **IR (ATR):**  $\nu$  (cm<sup>-1</sup>): 3089, 2933, 2857, 1726, 1581, 1550, 1441, 1420, 1376, 1321, 1254, 1208, 1135, 1094, 967, 897, 857, 786, 750, 679, 656, 640, 625, 590, 563, 551.

**([1,1'-Biphenyl]-4-ylmethyl)(perfluoroethyl)sulfane (3e)**

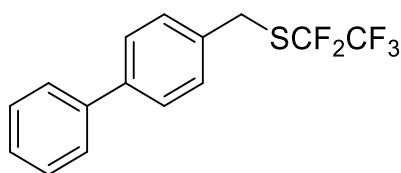

**3e**

Prepared from biphenyl-4-methanol (**2e**) and BT-SC<sub>2</sub>F<sub>5</sub> using General Procedure C. Colourless solid (144 mg, 0.45 mmol, 90%).

**<sup>1</sup>H NMR (400 MHz, Chloroform-*d*)**  $\delta$  = 7.68 – 7.59 (m, 4H), 7.56 – 7.37 (m, 5H), 4.25 (s, 2H). **<sup>19</sup>F NMR (376 MHz, Chloroform-*d*)**  $\delta$  = -83.2 (t, *J* = 4 Hz, 3F), -92.1 (q, *J* = 4 Hz, 2F). **<sup>13</sup>C NMR (101 MHz, Chloroform-*d*)**  $\delta$  = 141.3 (C<sub>q</sub>), 140.5 (C<sub>q</sub>), 133.7 (C<sub>q</sub>), 129.7 (CH), 129.0 (CH), 127.8 (CH), 127.7 (CH), 127.2 (CH), 121.6 (tq, *J* = 288, 41 Hz, CF<sub>2</sub>), 118.8 (qt, *J* = 286, 37 Hz, CF<sub>3</sub>), 32.8 (t, *J* = 4 Hz, CH<sub>2</sub>). **HRMS (EI):** *m/z* calculated for [C<sub>15</sub>H<sub>11</sub>F<sub>5</sub>S]<sup>+</sup> ([M]<sup>+</sup>): 318.0496, measured: 318.0509. **IR (ATR):**  $\nu$  (cm<sup>-1</sup>): 3083, 3033, 2939, 2860, 1977, 1919, 1796, 1683, 1598, 1565, 1522, 1488, 1443, 1408, 1324, 1248, 1199, 1129, 1096, 1007, 966, 843, 751, 769, 735, 714, 690, 638, 625, 593, 540.

**((4-*tert*-Butyl)benzyl)(perfluoroethyl)sulfane (3f)**

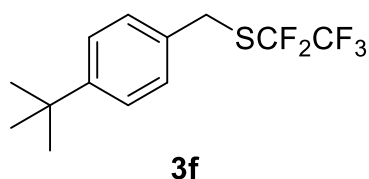

Prepared from 4-*tert*-butylbenzyl alcohol (**2f**) and BT-SC<sub>2</sub>F<sub>5</sub> using General Procedure C. Yellow liquid (119 mg, 0.40 mmol, 80%).

**<sup>1</sup>H NMR (600 MHz, Chloroform-*d*)**  $\delta$  = 7.39 (d, *J* = 8.3 Hz, 2H), 7.30 (d, *J* = 8.1 Hz, 2H), 4.15 (s, 2H), 1.33 (s, 9H). **<sup>19</sup>F NMR (565 MHz, Chloroform-*d*)**  $\delta$  = -83.2 (t, *J* = 5 Hz, 3F), -92.3 (q, *J* = 5 Hz, 2F). **<sup>13</sup>C NMR (151 MHz, Chloroform-*d*)**  $\delta$  = 151.4 (C<sub>q</sub>), 131.4 (C<sub>q</sub>), 128.9 (CH), 126.0 (CH), 123.4 (tq, *J* = 288, 40 Hz, CF<sub>2</sub>), 118.7 (qt, *J* = 286, 36 Hz, CF<sub>3</sub>), 34.7 (C<sub>q</sub>), 32.6 (t, *J* = 4 Hz, CH<sub>2</sub>), 31.3 (CH<sub>3</sub>). **HRMS (EI):** *m/z* calculated for [C<sub>13</sub>H<sub>15</sub>F<sub>5</sub>S]<sup>+</sup> ([M]<sup>+</sup>): 298.0815, measured: 298.0840. **IR (ATR):**  $\nu$  (cm<sup>-1</sup>): 3028, 2965, 2909, 2869, 1517, 1465, 1414, 1365, 1322, 1269, 1252, 1209, 1095, 1019, 986, 836, 750, 705, 624, 590, 559.

**Methyl 4-(((perfluoroethyl)thio)methyl)benzoate (3g)**

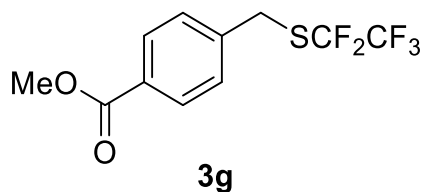

Prepared from methyl 4-(hydroxymethyl)benzoate (**2g**) and BT-SC<sub>2</sub>F<sub>5</sub> using General Procedure C. Yellow liquid (128 mg, 0.43 mmol, 85%).

**<sup>1</sup>H NMR (600 MHz, Chloroform-*d*)**  $\delta$  = 8.02 (d, *J* = 8.3 Hz, 2H), 7.42 (d, *J* = 8.3 Hz, 2H), 4.17 (s, 2H), 3.91 (s, 3H). **<sup>19</sup>F NMR (565 MHz, Chloroform-*d*)**  $\delta$  = -83.3 (m, 3F), -92.2 (m, 2F). **<sup>13</sup>C NMR (151 MHz, Chloroform-*d*)**  $\delta$  = 167.3 (C<sub>q</sub>), 138.8 (C<sub>q</sub>), 130.3 (CH), 130.0 (C<sub>q</sub>), 129.1 (CH), 120.5 (tq, *J* = 289, 41 Hz, CF<sub>2</sub>), 118.6 (qt, *J* = 286, 36 Hz, CF<sub>3</sub>), 52.3 (CH<sub>3</sub>), 32.6 (t, *J* = 4 Hz, CH<sub>2</sub>). **HRMS (EI):** *m/z* calculated for [C<sub>11</sub>H<sub>9</sub>F<sub>5</sub>O<sub>2</sub>S]<sup>+</sup> ([M]<sup>+</sup>): 300.0243, measured: 300.0254. **IR (ATR):**  $\nu$  (cm<sup>-1</sup>): 3007, 2956, 2848, 1720, 1613, 1578, 1437, 1415, 1323, 1279, 1206, 1180, 1095, 1021, 966, 861, 839, 797, 775, 750, 723, 711, 624, 590, 552.

**(3-Bromobenzyl)(perfluoroethyl)sulfane (3h)**

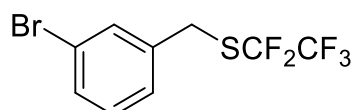

**3h**

Prepared from methyl 3-bromobenzyl alcohol (**2h**) and BT-SC<sub>2</sub>F<sub>5</sub> using General Procedure C. Pale red liquid (126 mg, 0.39 mmol, 78%).

**<sup>1</sup>H NMR (400 MHz, Chloroform-*d*)**  $\delta$  = 7.52 (t, *J* = 1.8 Hz, 1H), 7.45 (ddd, *J* = 7.8, 2.0, 1.2 Hz, 1H), 7.30 (m, 1H), 7.23 (t, *J* = 7.8 Hz, 1H), 4.11 (s, 2H). **<sup>19</sup>F NMR (376 MHz, Chloroform-*d*)**  $\delta$  = -83.3 (t, *J* = 4 Hz, 3F), -92.2 (q, *J* = 4 Hz, 2F). **<sup>13</sup>C NMR (101 MHz, Chloroform-*d*)**  $\delta$  = 137.2 (C<sub>q</sub>), 132.2 (CH), 131.5 (CH), 130.6 (CH), 127.4 (CH), 122.9 (C<sub>q</sub>), 121.4 (tq, *J* = 288, 41 Hz, CF<sub>2</sub>), 118.7 (qt, *J* = 286, 37 Hz, CF<sub>3</sub>), 32.4 (t, *J* = 4 Hz, CH<sub>2</sub>). **HRMS (EI)**: *m/z* calculated for [C<sub>9</sub>H<sub>6</sub>BrF<sub>5</sub>S]<sup>+</sup> ([M]<sup>+</sup>): 319.9288, measured: 319.9280. **IR (ATR)**:  $\nu$  (cm<sup>-1</sup>): 3071, 2949, 1601, 1571, 1476, 1429, 1322, 1206, 1095, 1072, 998, 966, 888, 848, 787, 750, 730, 706, 681, 668, 625, 591, 577, 550.

**(Perfluoroethyl)(3-phenylprop-2-yn-1-yl)sulfane (3i)**

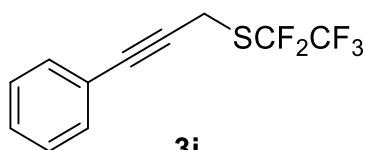

**3i**

Prepared from 3-phenylprop-2-yn-1-ol (**2i**) and BT-SC<sub>2</sub>F<sub>5</sub> using General Procedure C. Yellow liquid (108 mg, 0.41 mmol, 81%).

**<sup>1</sup>H NMR (600 MHz, Chloroform-*d*)**  $\delta$  = 7.44 (dd, *J* = 7.7, 1.8 Hz, 2H), 7.37 – 7.30 (m, 3H), 7.30 (m, 1H), 3.94 (s, 2H). **<sup>19</sup>F NMR (565 MHz, Chloroform-*d*)**  $\delta$  = -83.3 (t, *J* = 4 Hz, 3F), -93.2 (q, *J* = 4 Hz, 2F). **<sup>13</sup>C NMR (151 MHz, Chloroform-*d*)**  $\delta$  = 131.9 (CH), 128.9 (CH), 128.5 (CH), 122.3 (C<sub>q</sub>), 121.3 (tq, *J* = 289, 41 Hz, CF<sub>2</sub>), 118.7 (qt, *J* = 286, 36 Hz, CF<sub>3</sub>), 84.9 (C<sub>q</sub>), 82.2 (C<sub>q</sub>), 18.5 (t, *J* = 6 Hz, CH<sub>2</sub>). **HRMS (EI)**: *m/z* calculated for [C<sub>11</sub>H<sub>7</sub>F<sub>5</sub>S]<sup>+</sup> ([M]<sup>+</sup>): 266.0183, measured: 266.0193. **IR (ATR)**:  $\nu$  (cm<sup>-1</sup>): 3059, 2928, 2854, 2224, 1729, 1599, 1492, 1443, 1410, 1312, 1271, 1207, 1131, 1095, 1029, 964, 916, 860, 751, 726, 689, 640, 625, 551.



### 3.3 Deoxyheptafluoropropylation of Alcohols **2** with BT-SC<sub>3</sub>F<sub>7</sub>

#### (Perfluoropropyl)(2,4,6-trichlorobenzyl)sulfane (**5d**)

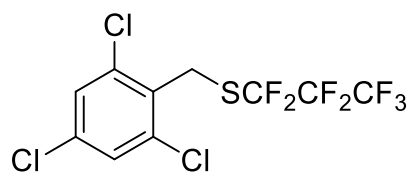

**5d**

Prepared from 2,4,6-trichlorobenzyl alcohol (**2d**) and BT-SC<sub>3</sub>F<sub>7</sub> using General Procedure C. Colourless liquid (196 mg, 0.49 mmol, 98%).

**<sup>1</sup>H NMR (600 MHz, Chloroform-*d*)**  $\delta$  = 7.38 (s, 2H), 4.44 (s, 2H). **<sup>19</sup>F NMR (565 MHz, Chloroform-*d*)**  $\delta$  = -80.0 (t, *J* = 9 Hz, 3F), -88.3 (m, 2F), -123.9 (m, 2F). **<sup>13</sup>C NMR (151 MHz, Chloroform-*d*)**  $\delta$  = 136.6 (C<sub>q</sub>), 135.2 (C<sub>q</sub>), 130.1 (C<sub>q</sub>), 128.8 (CH), 123.8 (tt, *J* = 290, 34 Hz, SCF<sub>2</sub>), 117.8 (qt, *J* = 287, 35 Hz, CF<sub>3</sub>), 108.7 (tm, *J* = 265 Hz, CF<sub>2</sub>), 28.2 (t, *J* = 5 Hz, CH<sub>2</sub>). **HRMS (EI):** *m/z* calculated for [C<sub>10</sub>H<sub>4</sub>Cl<sub>3</sub>F<sub>7</sub>S]<sup>+</sup> ([M]<sup>+</sup>): 393.8982, measured: 393.8983. **IR (ATR):**  $\nu$  (cm<sup>-1</sup>): 3083, 2928, 2851, 1726, 1581, 1550, 1528, 1441, 1420, 1376, 1336, 1207, 1184, 1110, 1088, 1072, 1037, 925, 852, 802, 786, 751, 742, 679, 654, 608, 563.

#### ([1,1'-Biphenyl]-4-ylmethyl)(perfluoropropyl)sulfane (**5e**)

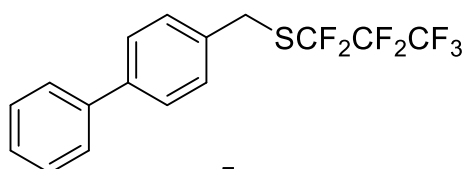

**5e**

Prepared from biphenyl-4-methanol (**2e**) and BT-SC<sub>3</sub>F<sub>7</sub> using General Procedure C. Pale yellow solid (145 mg, 0.394 mmol, 79%).

**<sup>1</sup>H NMR (400 MHz, Chloroform-*d*)**  $\delta$  = 7.59 – 7.65 (m, 4H), 7.44 – 7.52 (m, 4H), 7.41 (m, 1H), 4.25 (s, 2H). **<sup>19</sup>F NMR (376 MHz, Chloroform-*d*)**  $\delta$  = -80.0 (t, *J* = 9 Hz, 3F), -88.2 (m, 2F), -124.0 (t, *J* = 4 Hz, 2F). **<sup>13</sup>C NMR (101 MHz, Chloroform-*d*)**  $\delta$  = 141.3 (C<sub>q</sub>), 140.6 (C<sub>q</sub>), 133.6 (C<sub>q</sub>), 129.7 (CH), 129.0 (CH), 127.8 (CH), 127.7 (CH), 127.3 (CH), 123.9 (tt, *J* = 289, 34 Hz, SCF<sub>2</sub>), 117.9 (qt, *J* = 288, 34 Hz, CF<sub>3</sub>), 108.9 (tm, *J* = 265 Hz, CF<sub>2</sub>), 32.8 (t, *J* = 4 Hz, CH<sub>2</sub>). **HRMS (EI):** *m/z* calculated for [C<sub>16</sub>H<sub>11</sub>F<sub>7</sub>S]<sup>+</sup> ([M]<sup>+</sup>): 368.0464, measured: 368.0476. **IR (ATR):**  $\nu$  (cm<sup>-1</sup>): 3074, 3032, 1520, 1488, 1445, 1407, 1335, 1207, 1183, 1112, 1089, 1037, 1007, 924, 857, 769, 740, 717, 695, 673, 610.

## 4 NMR Spectra of Novel Compounds

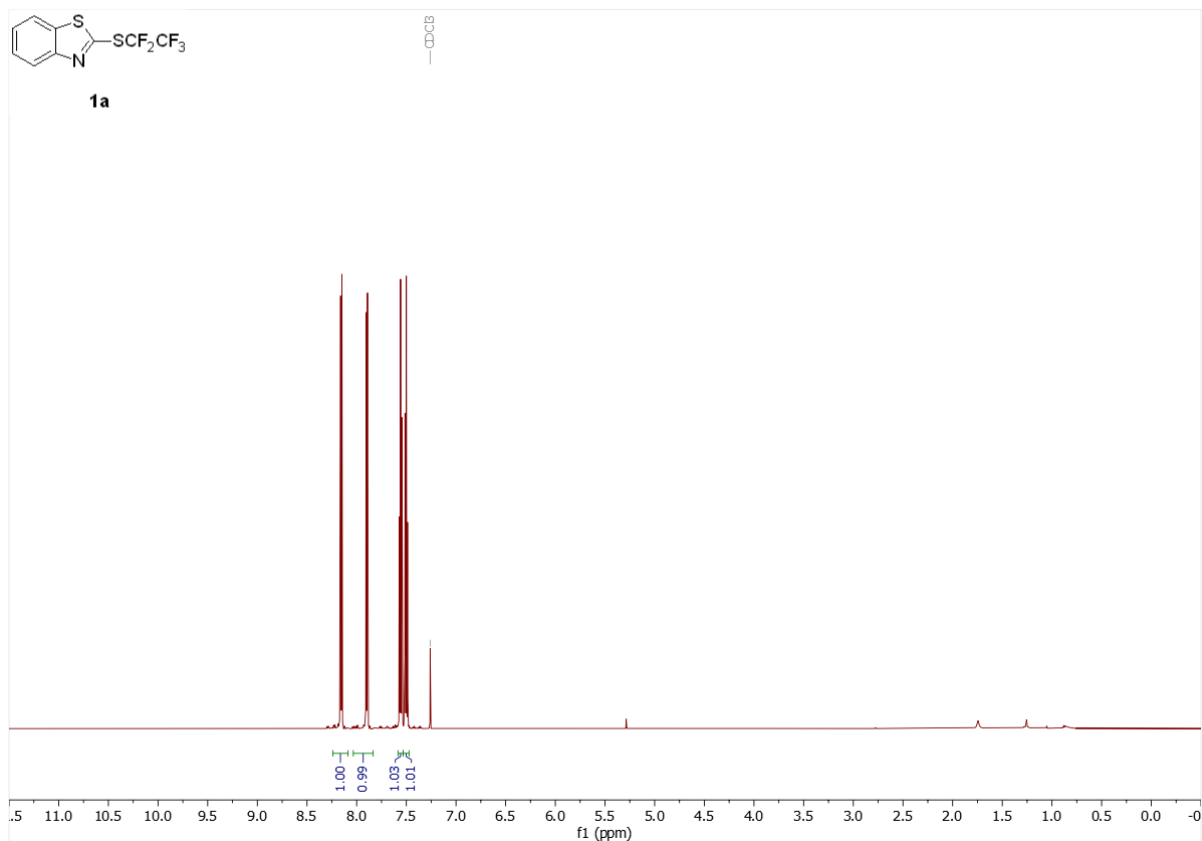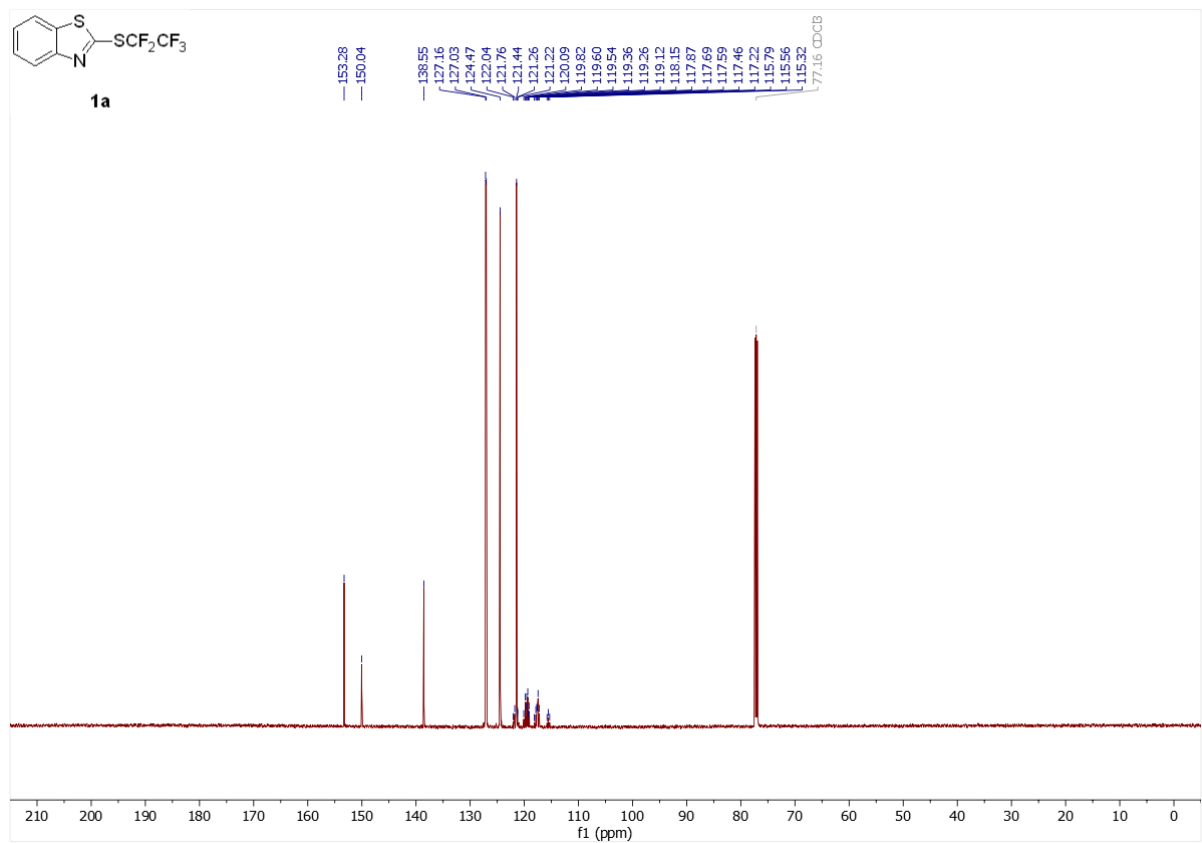

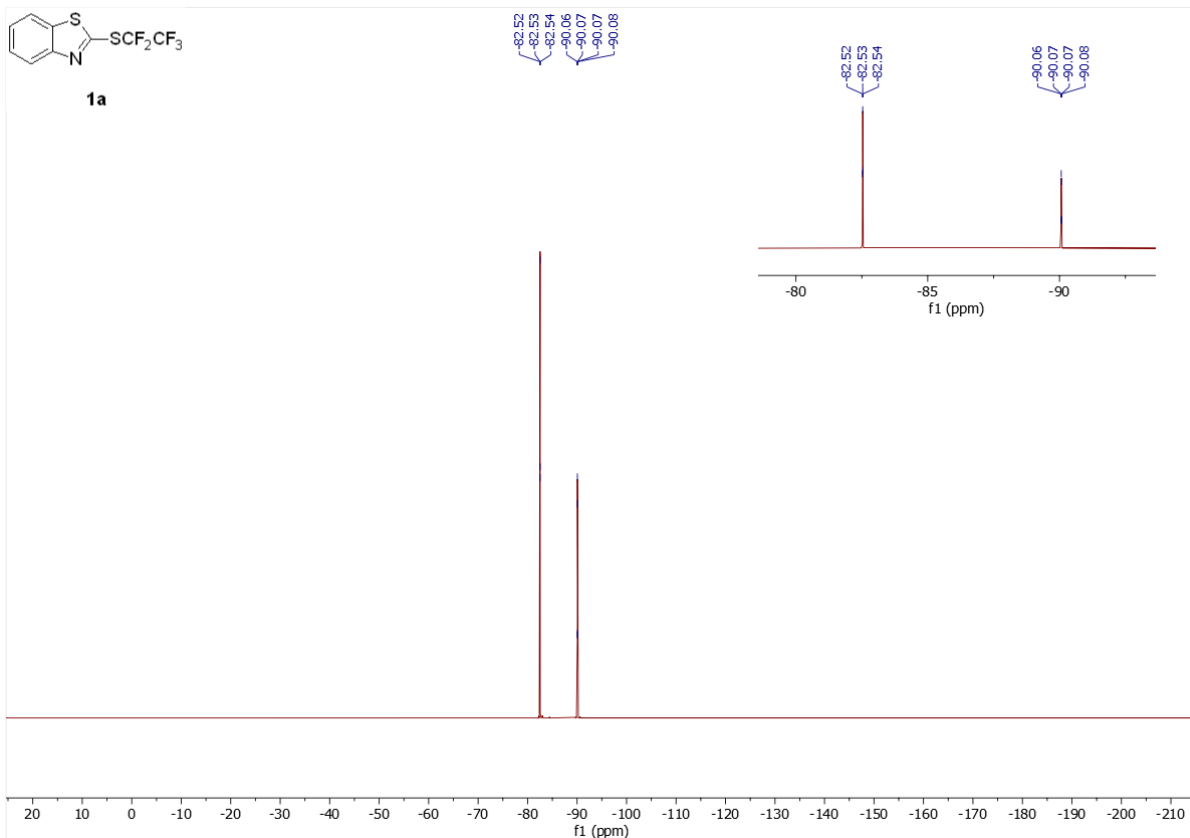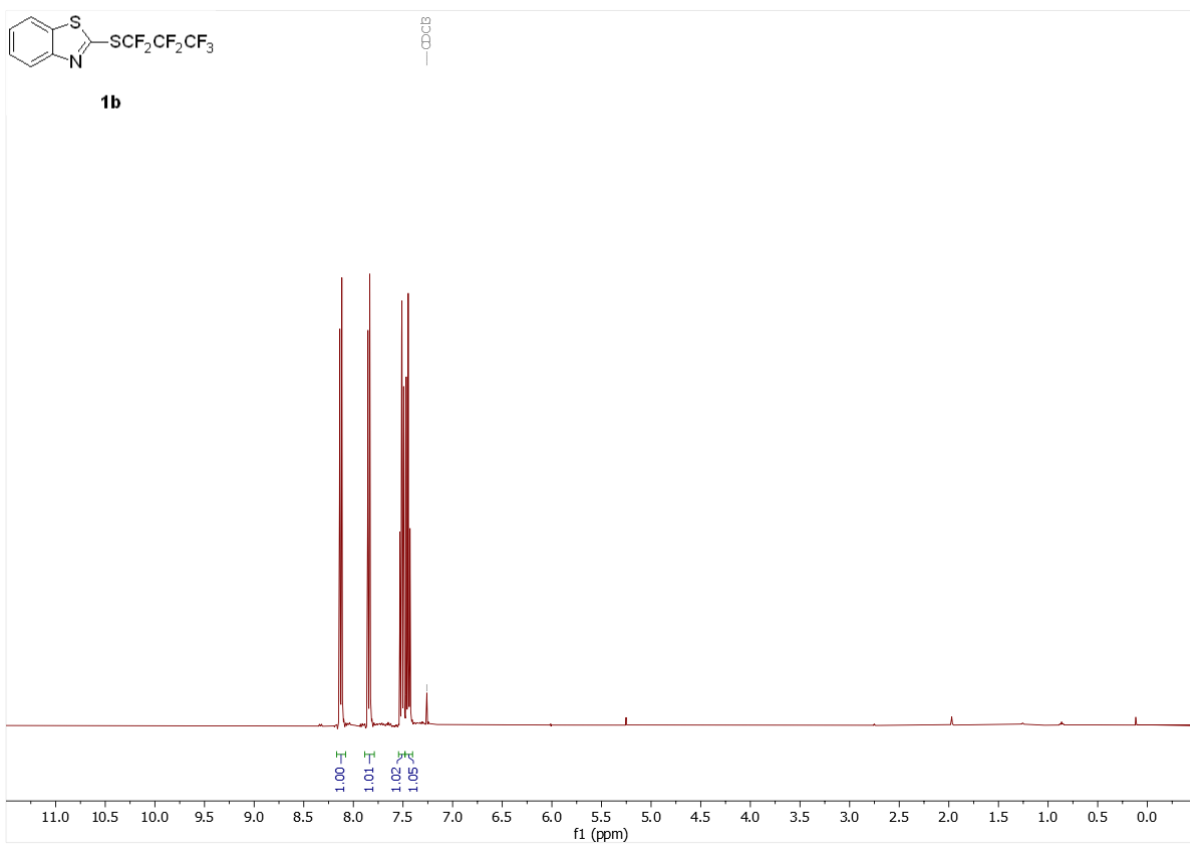



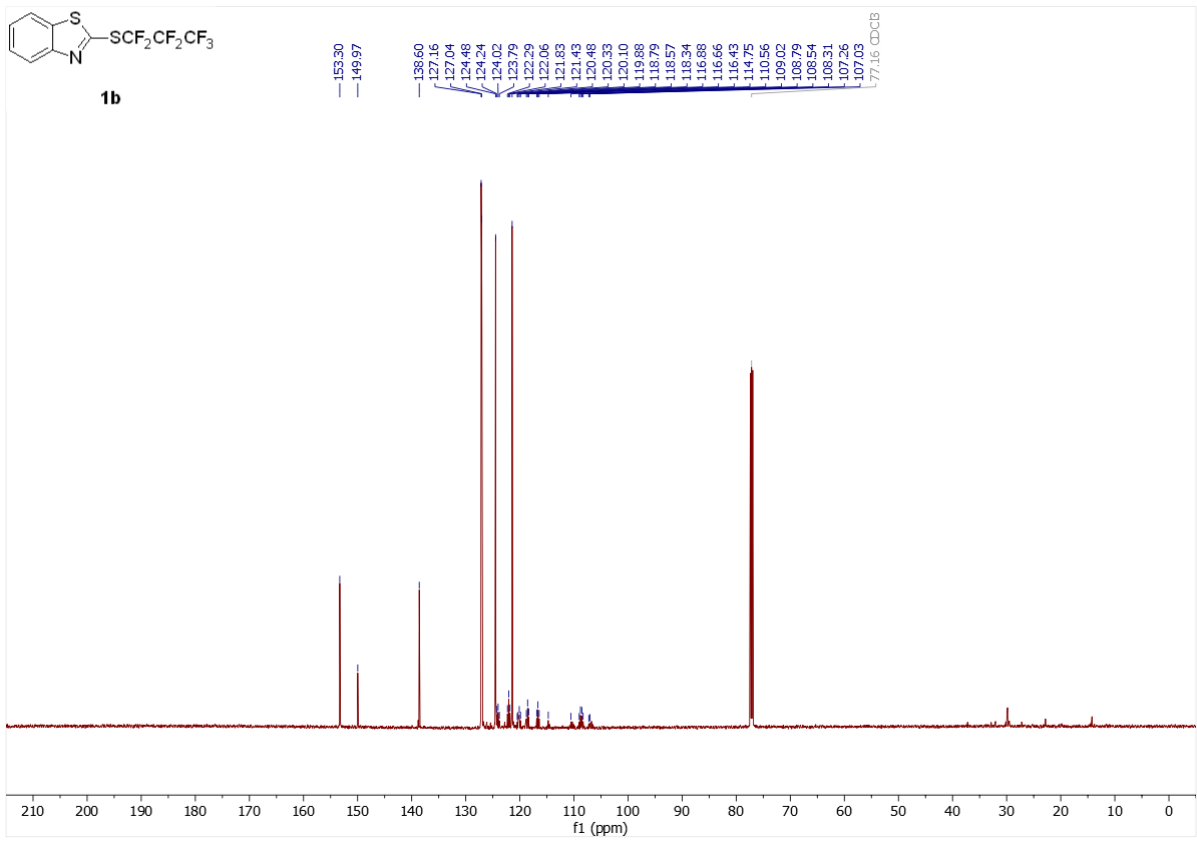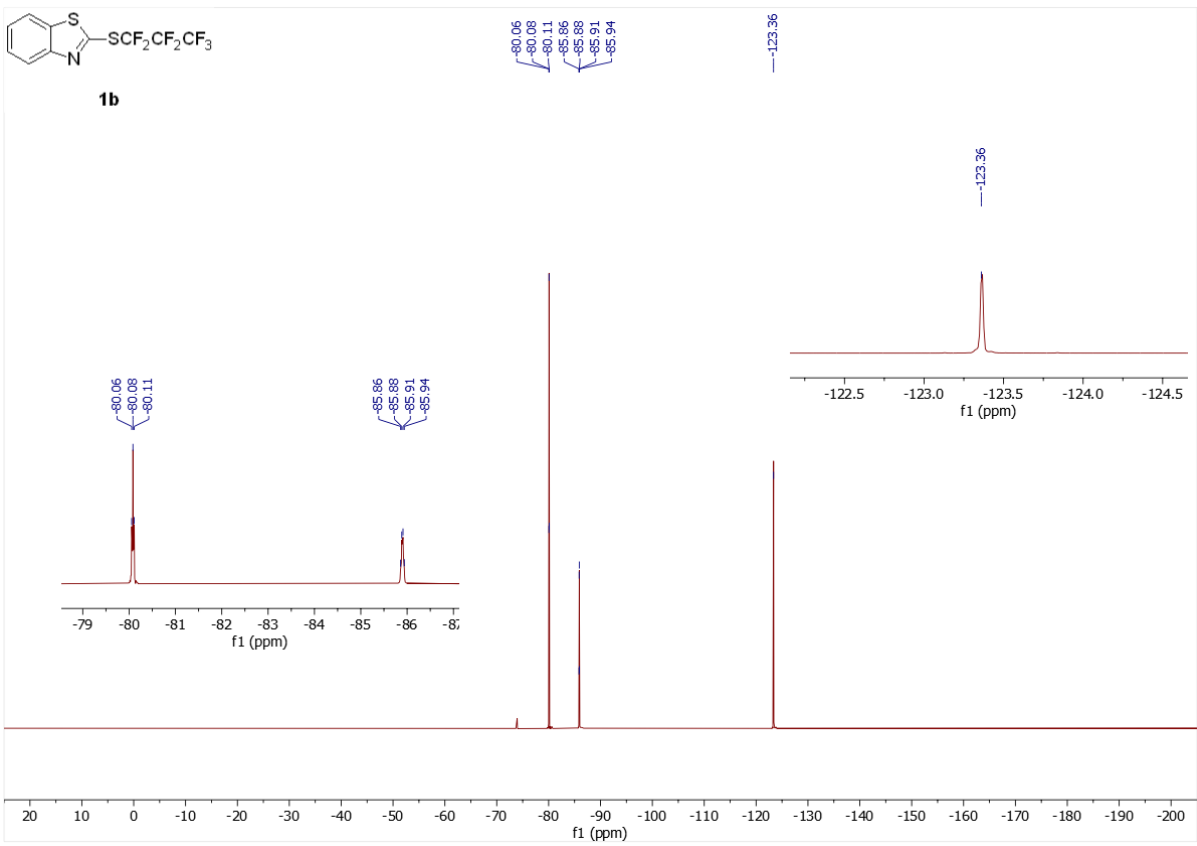

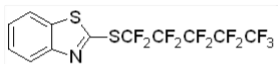

1c

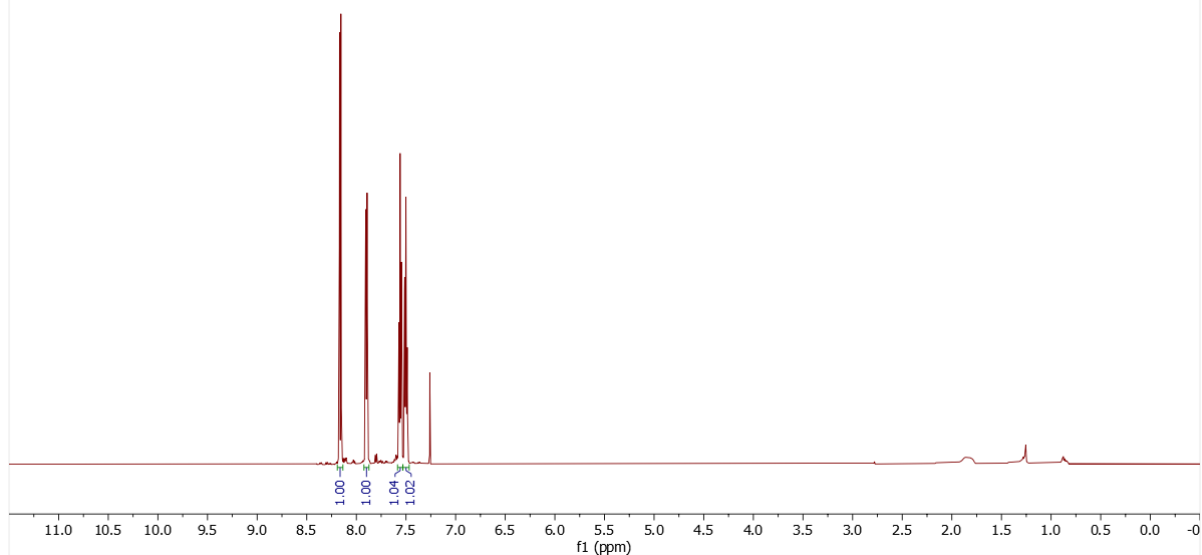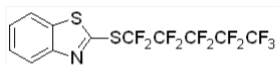

1c

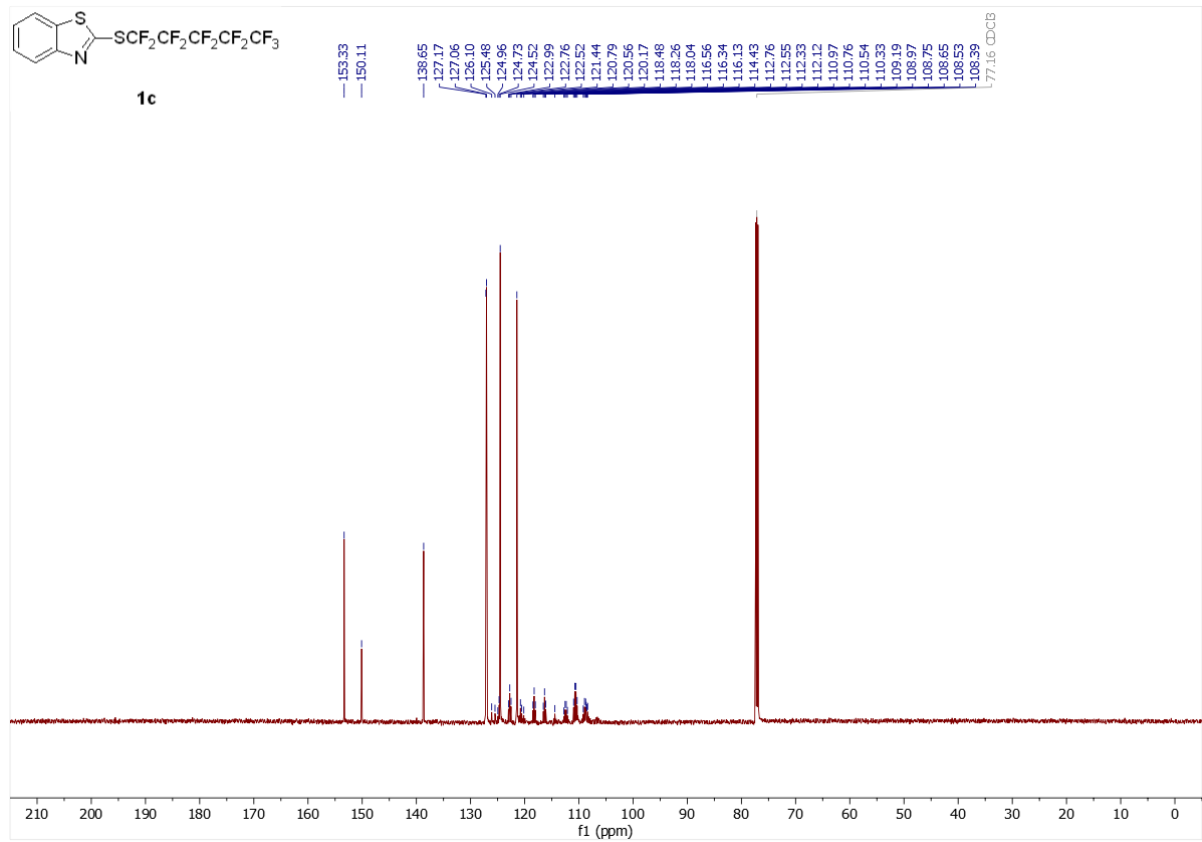



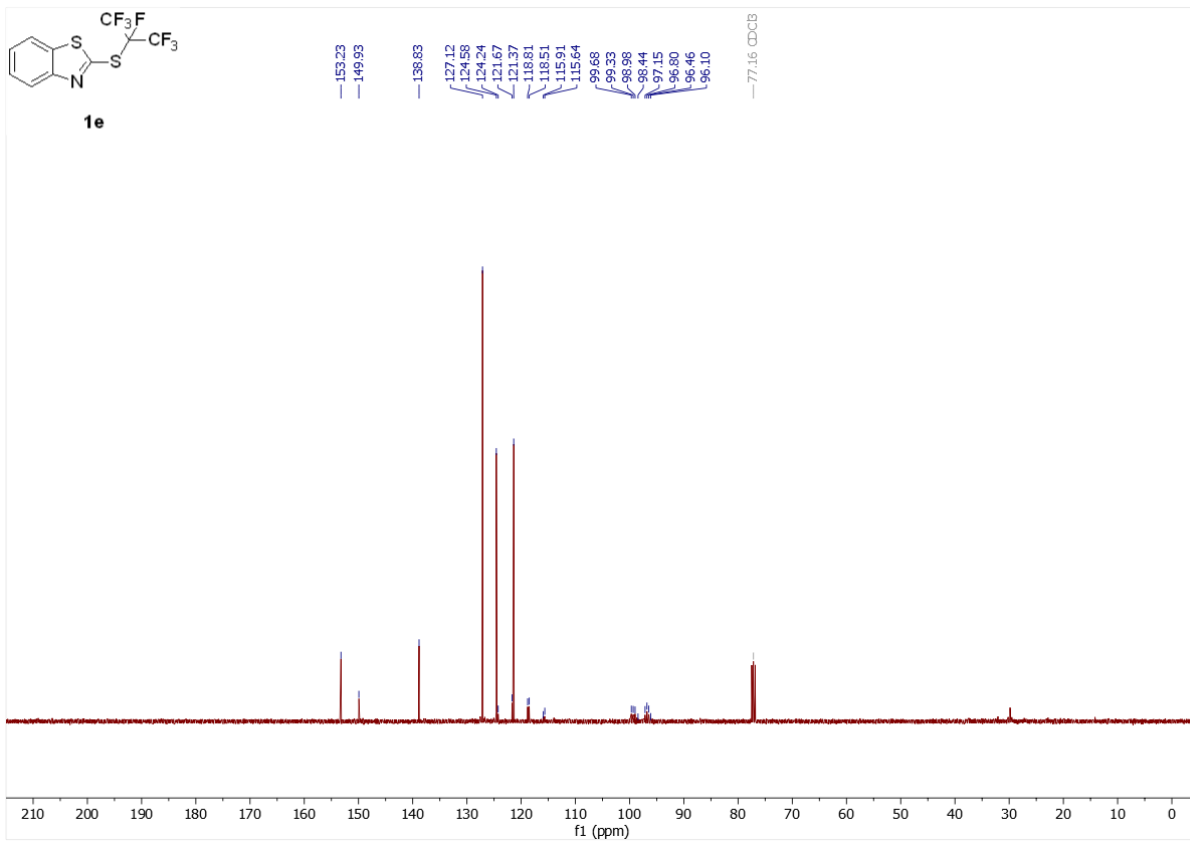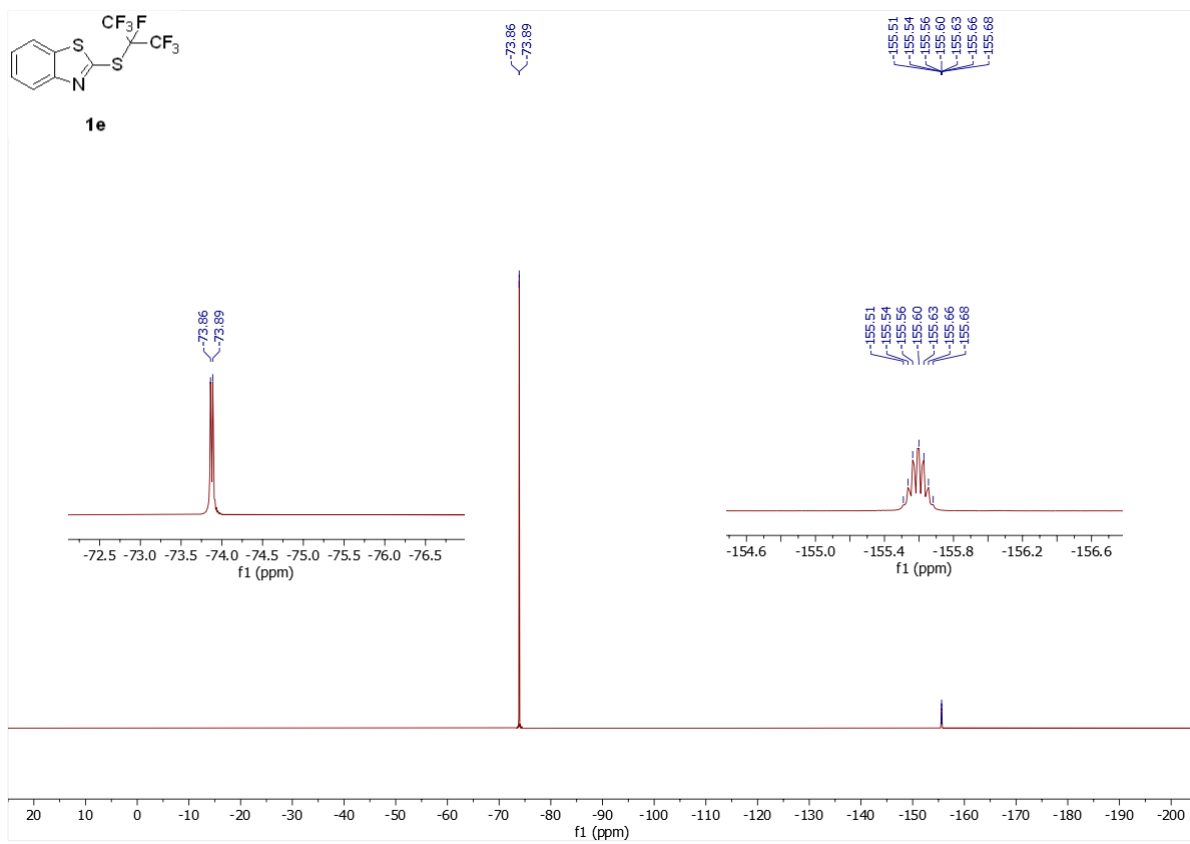

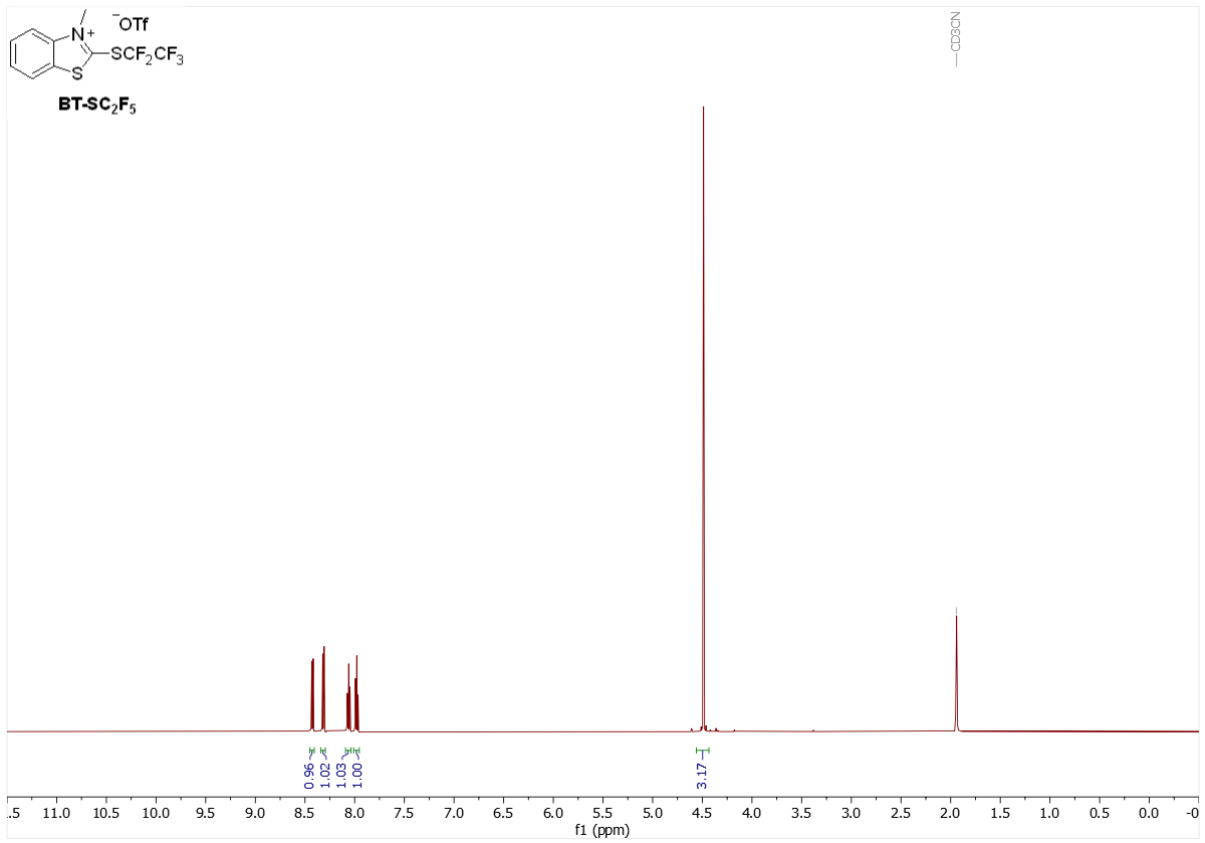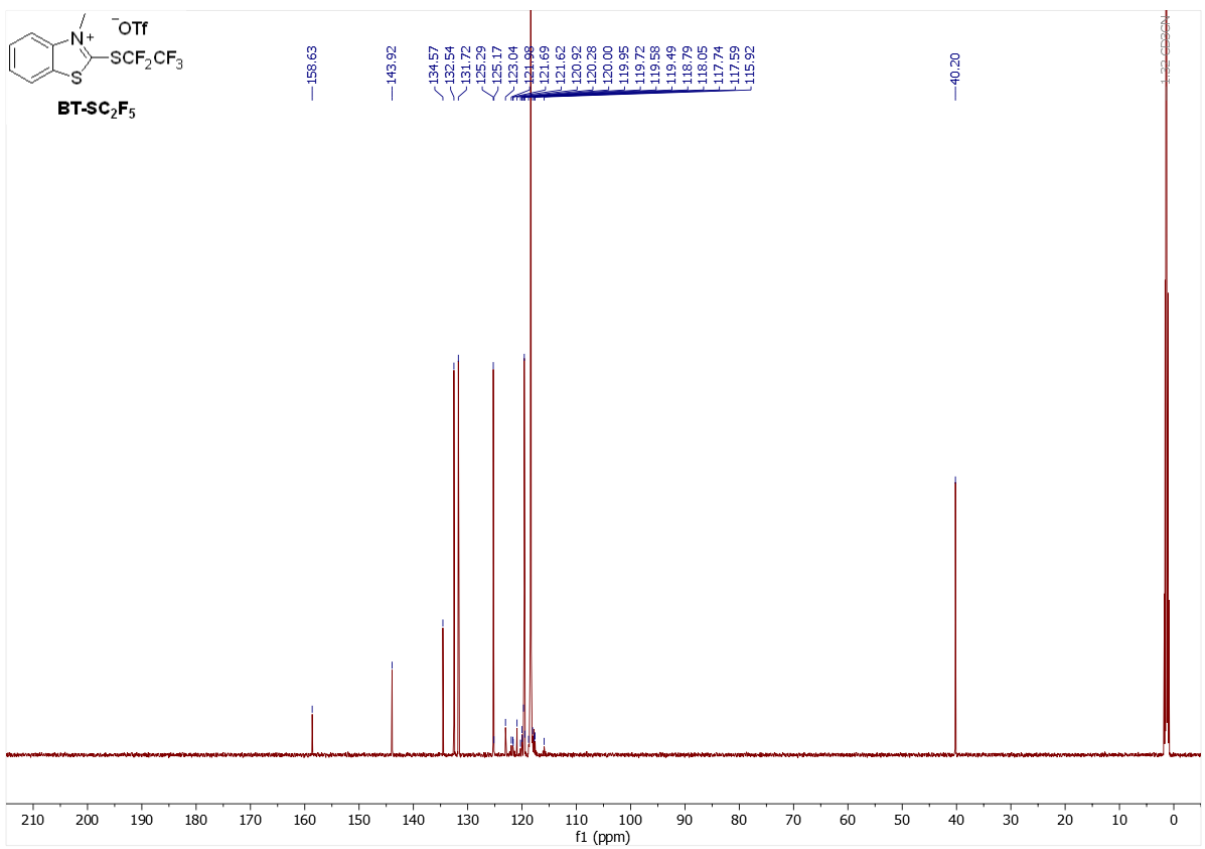

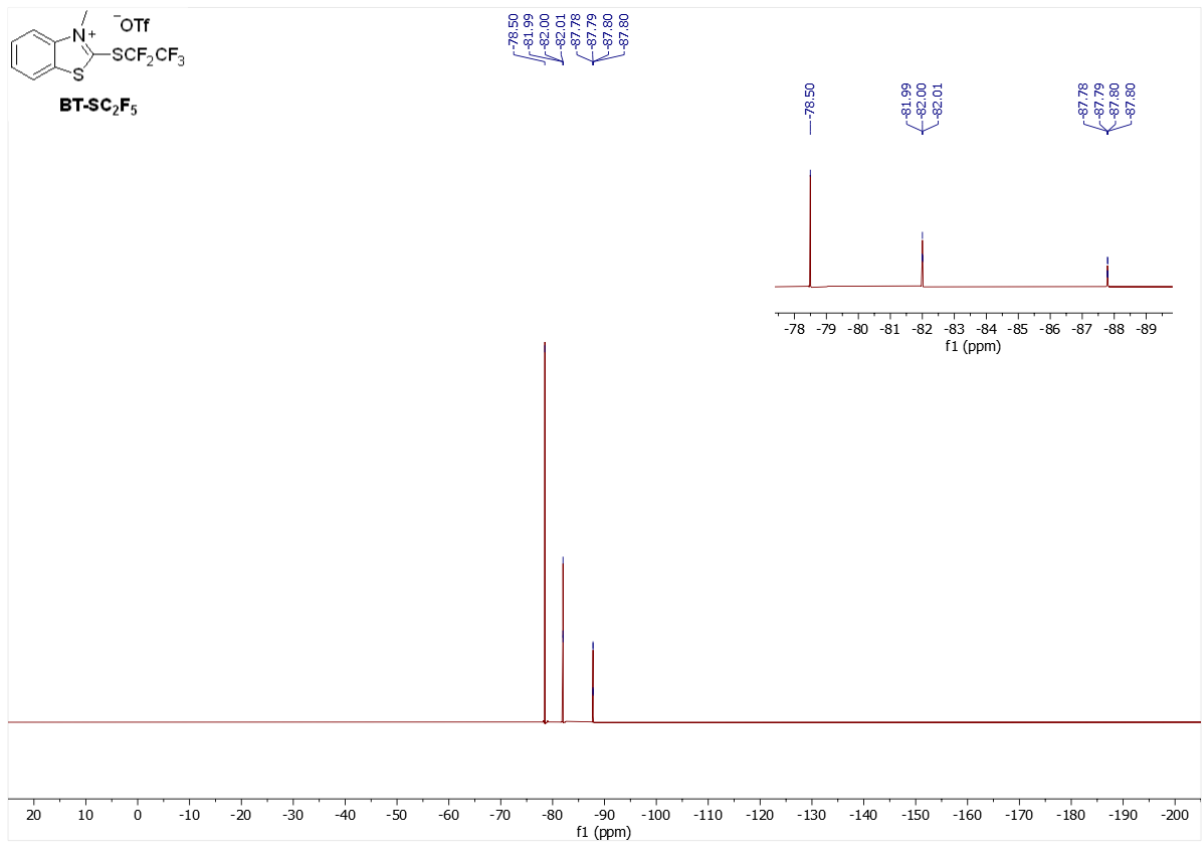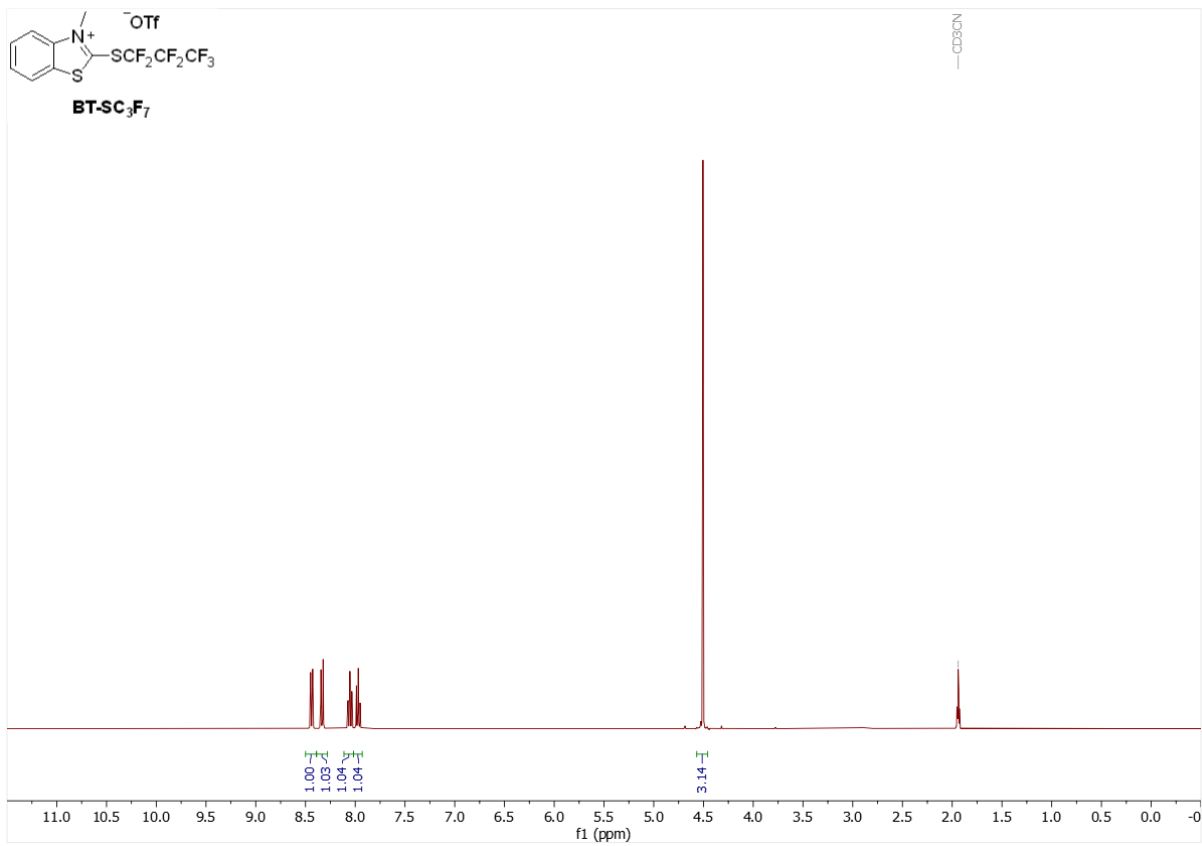

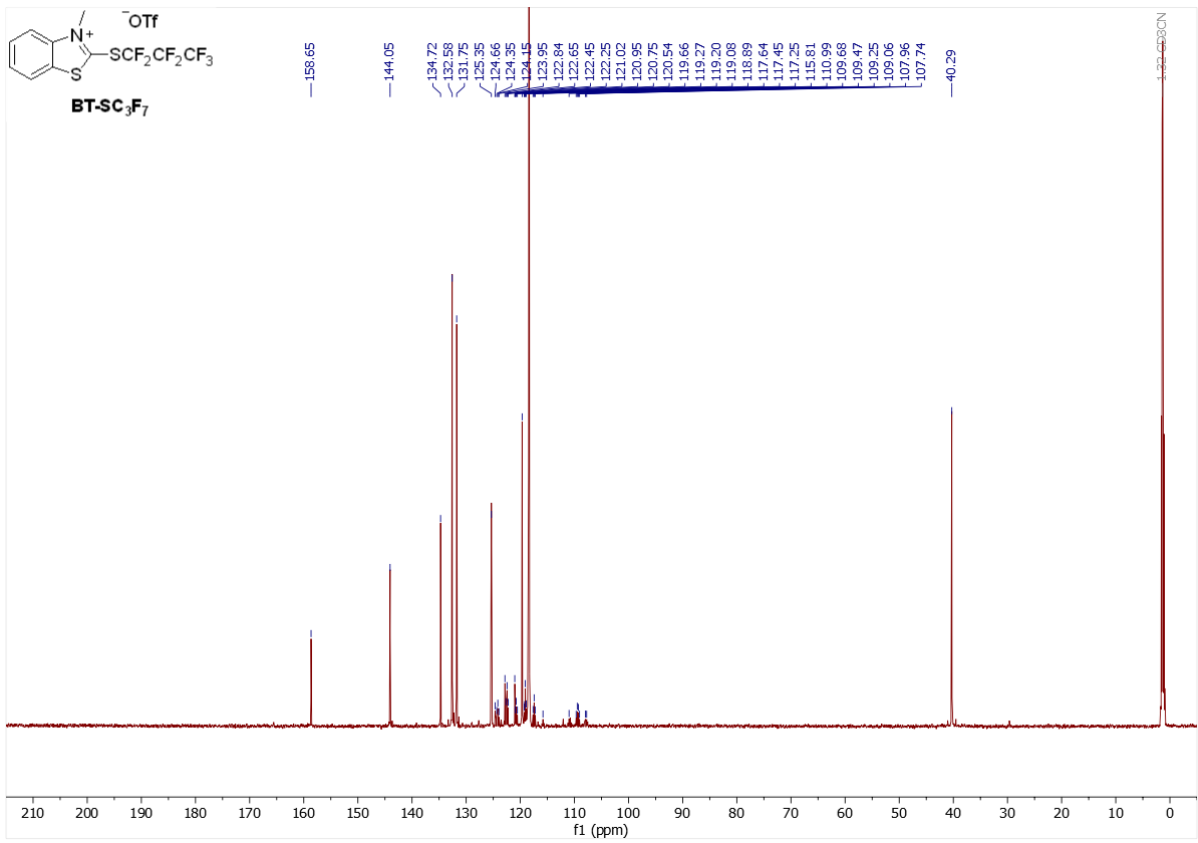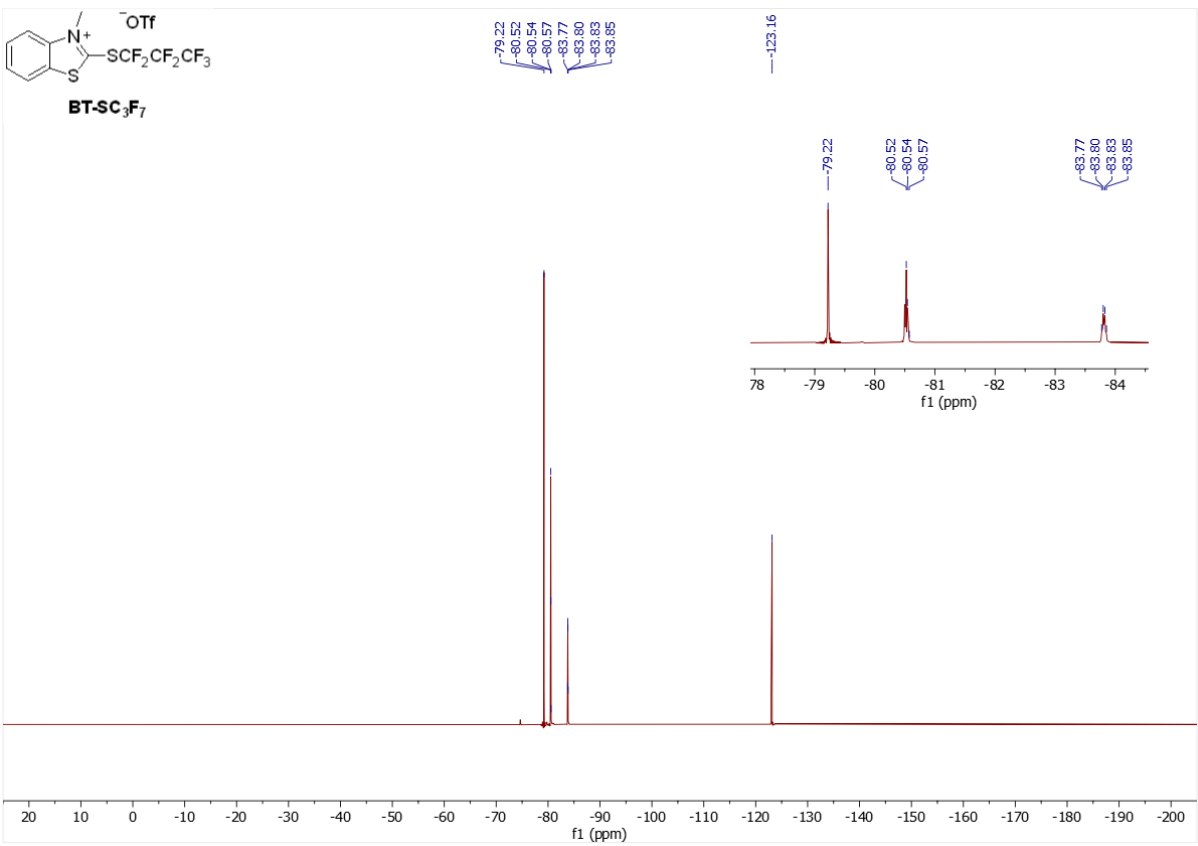

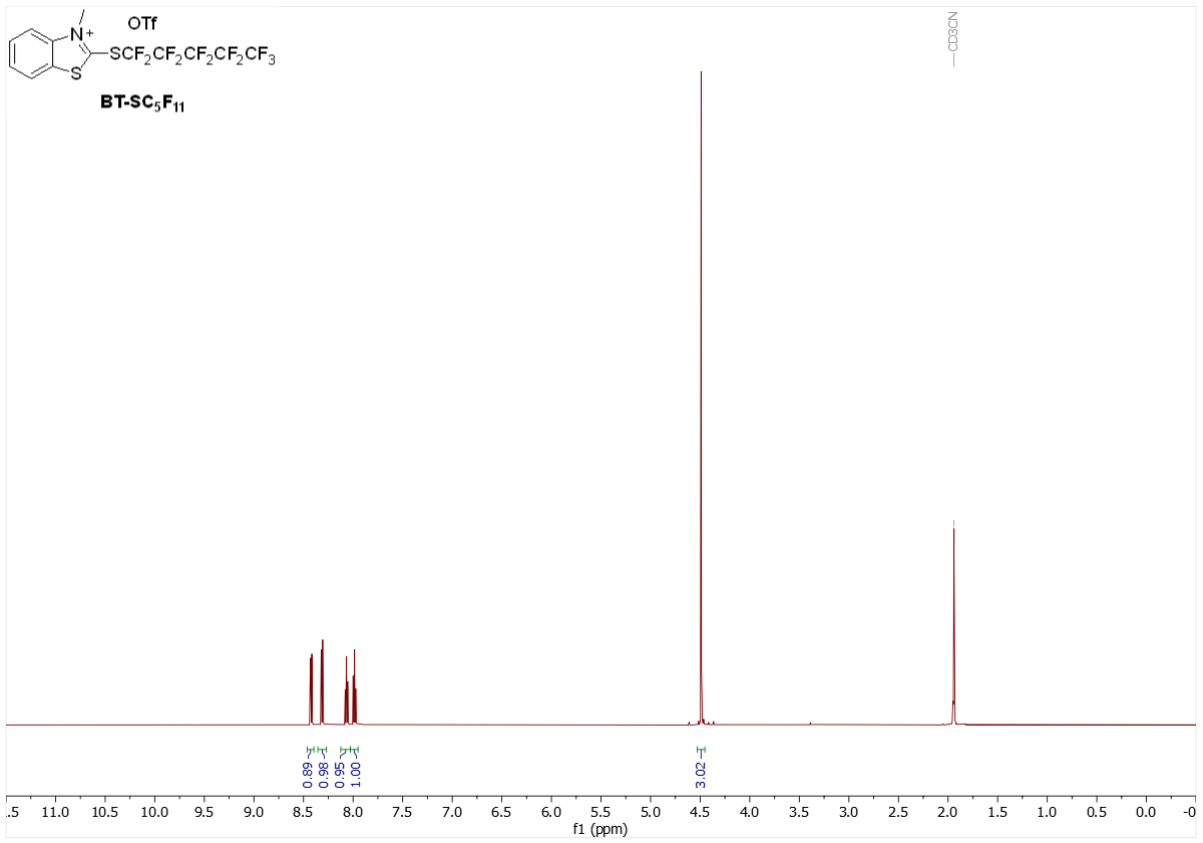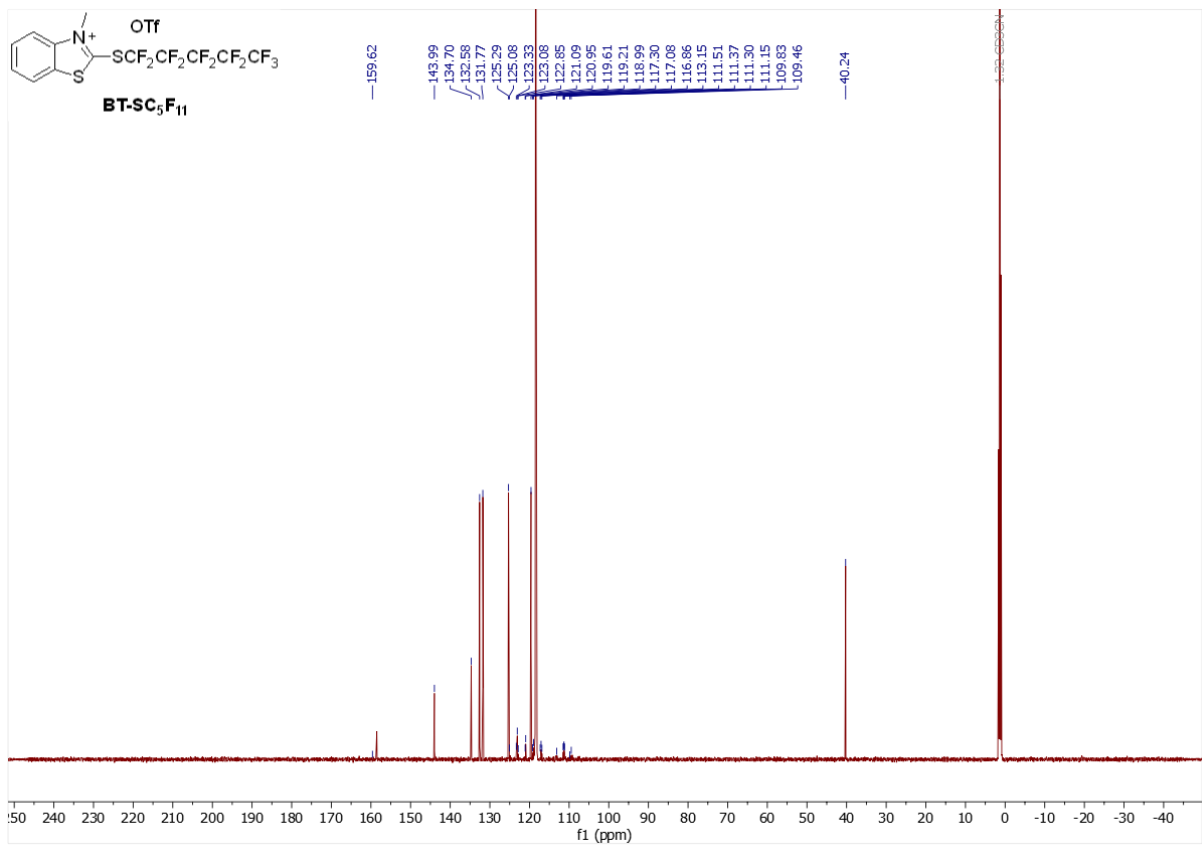



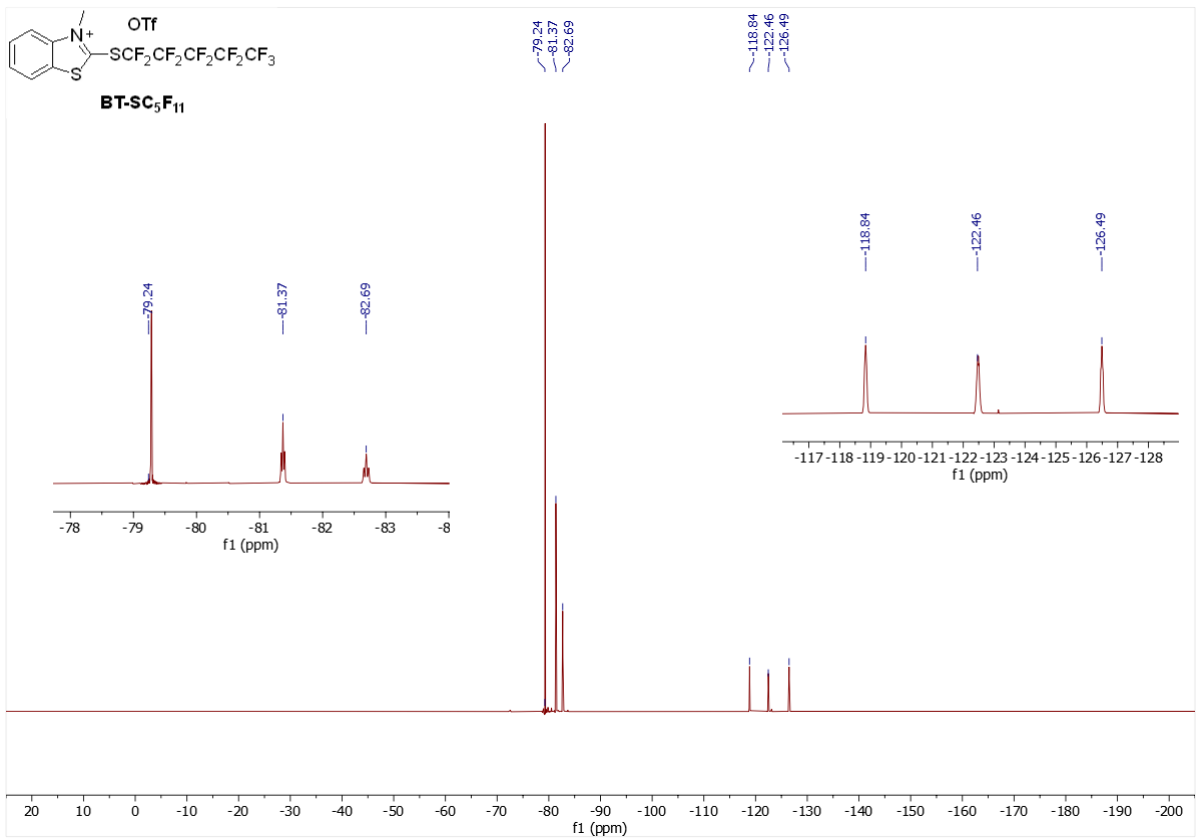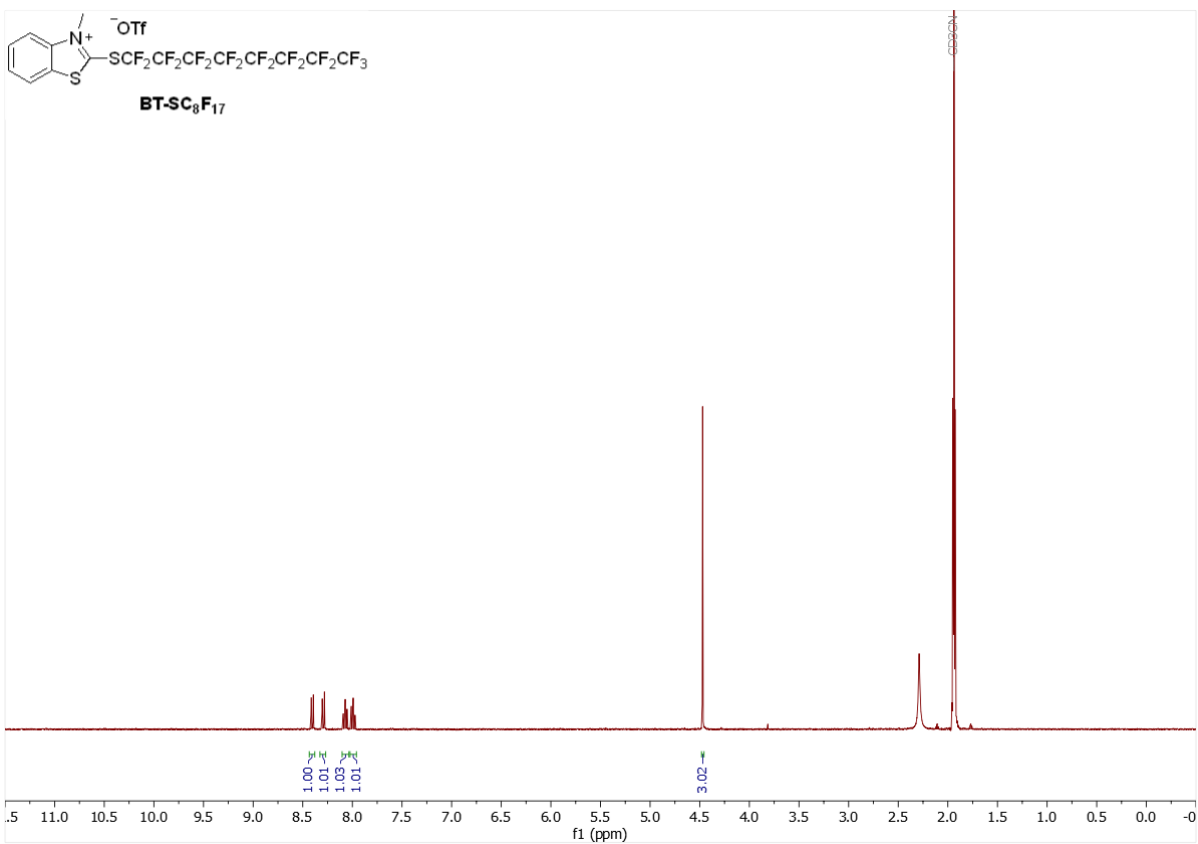



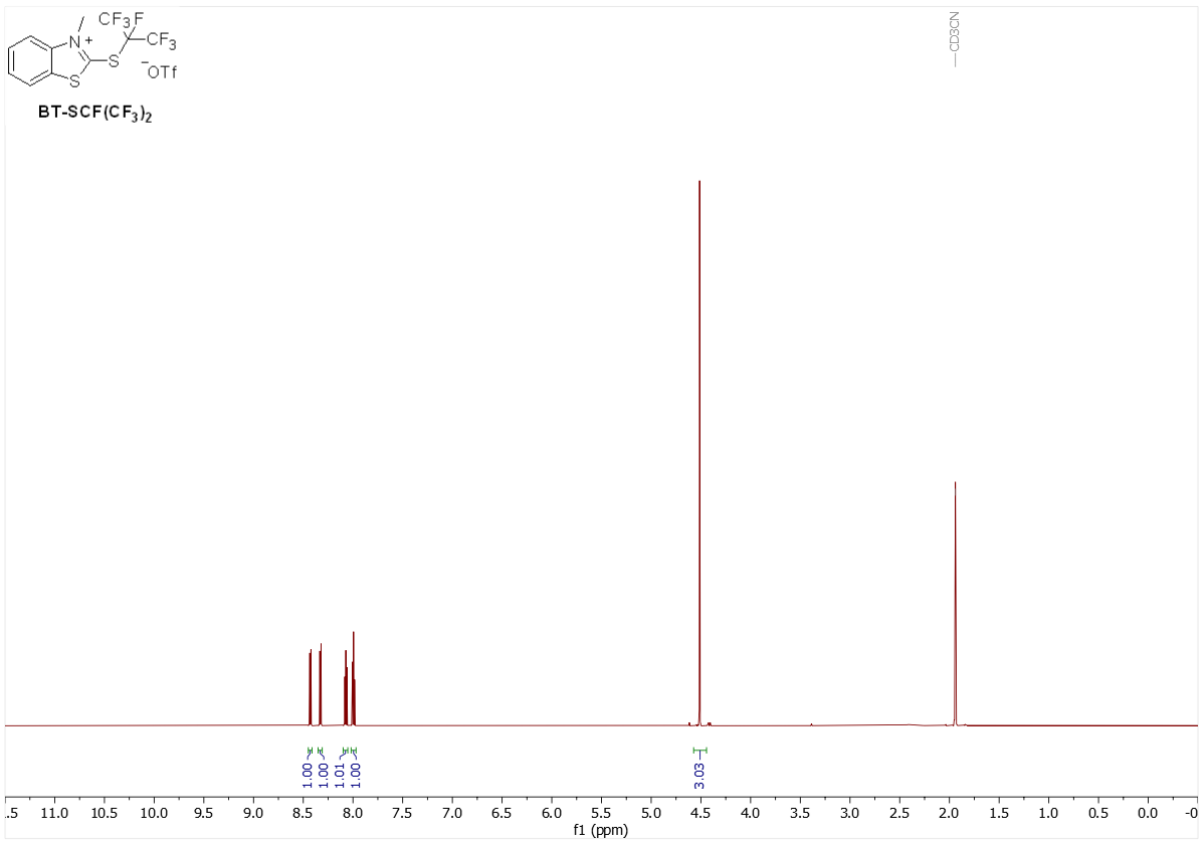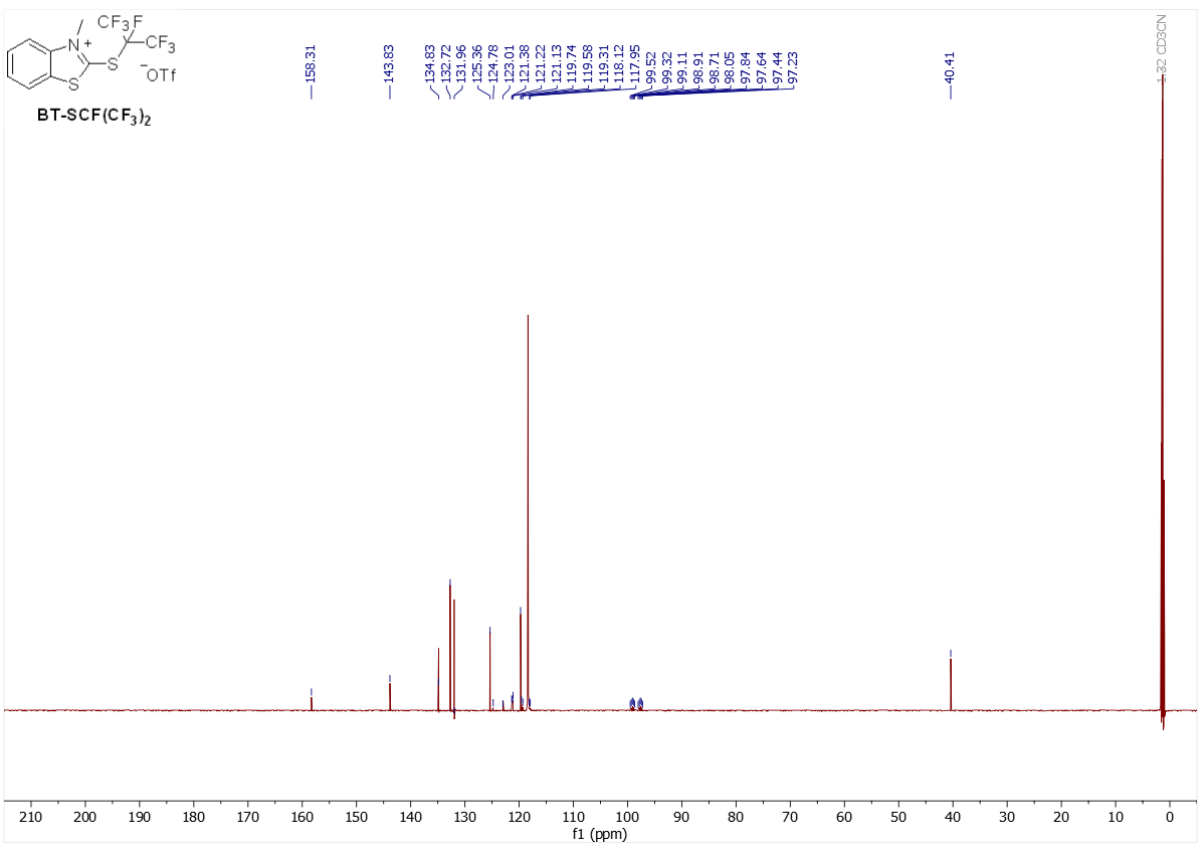

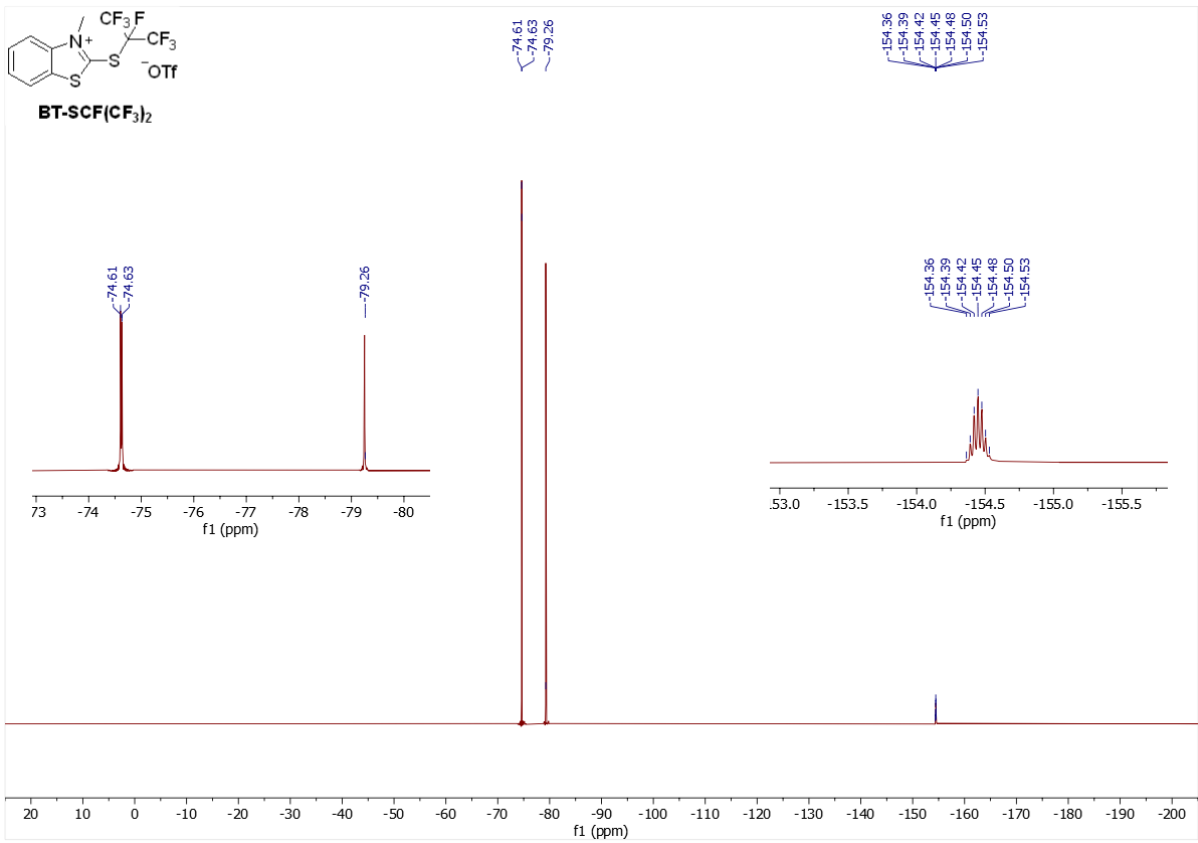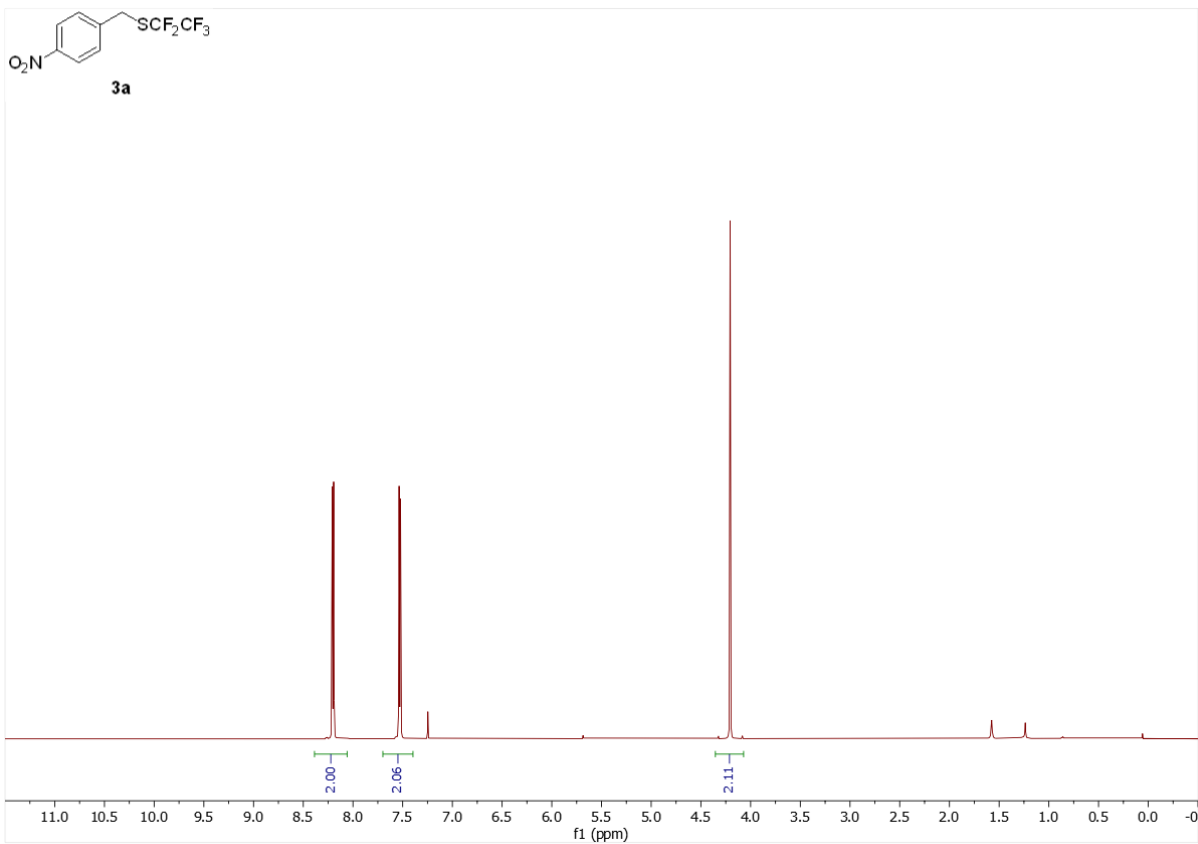

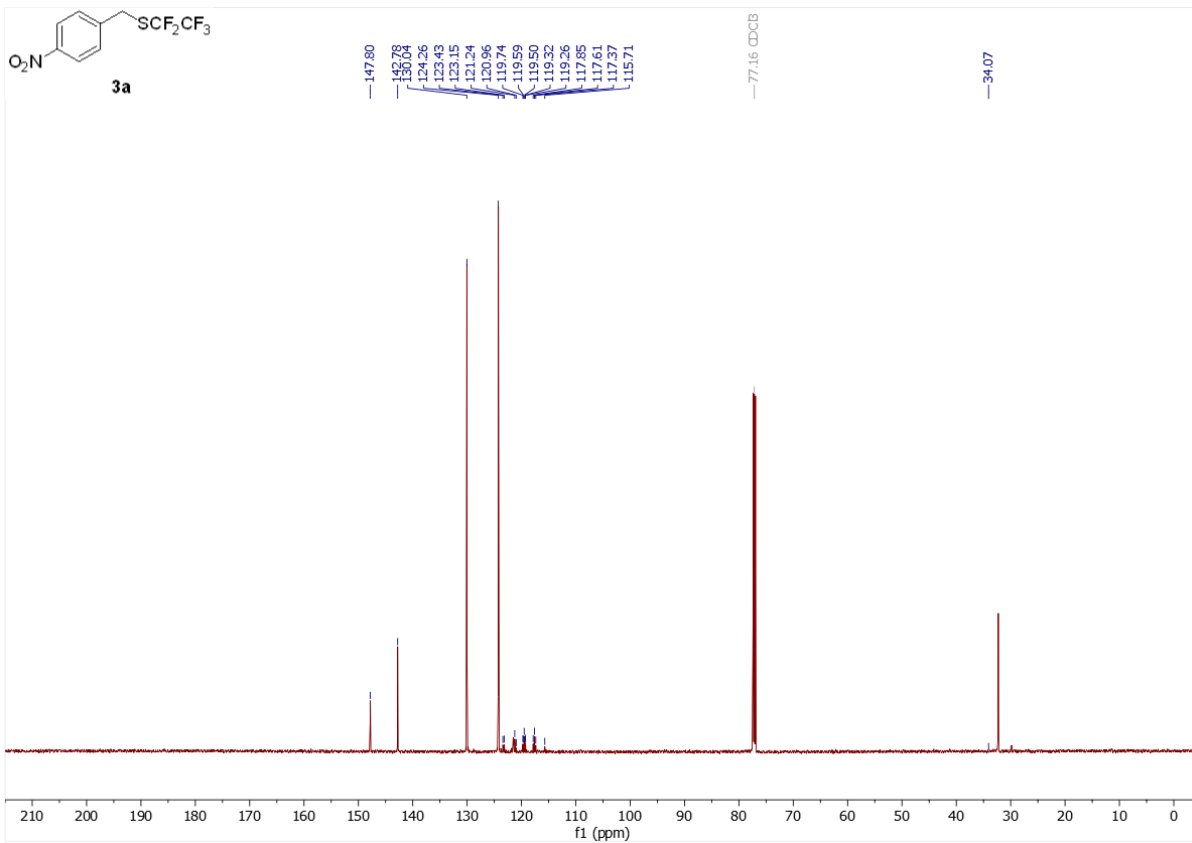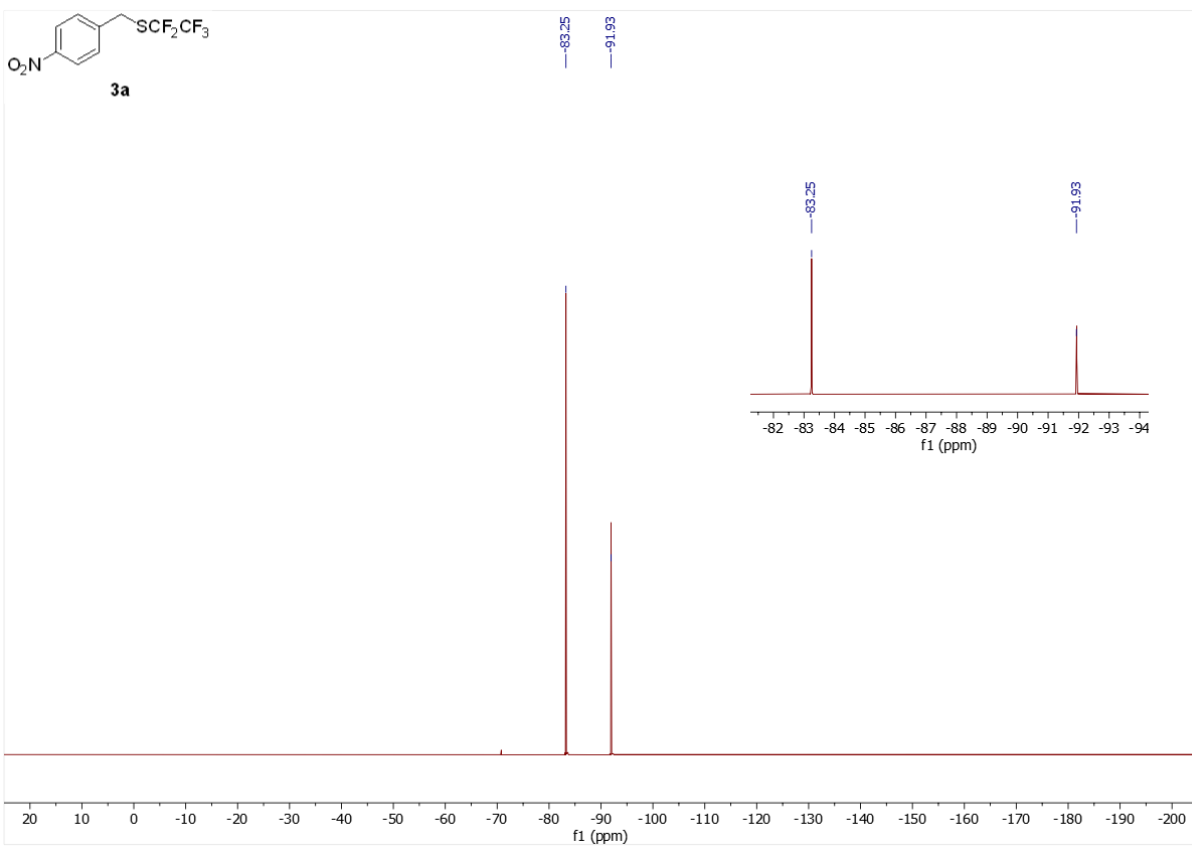

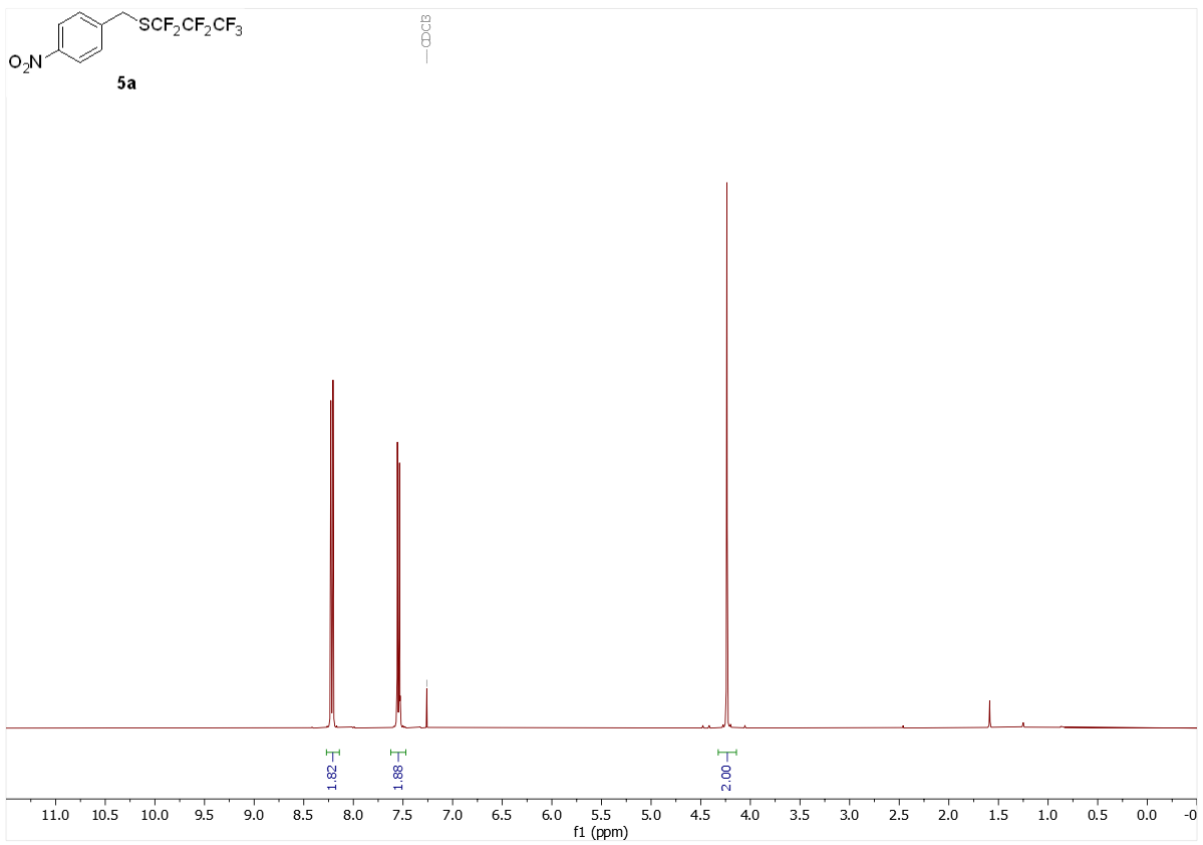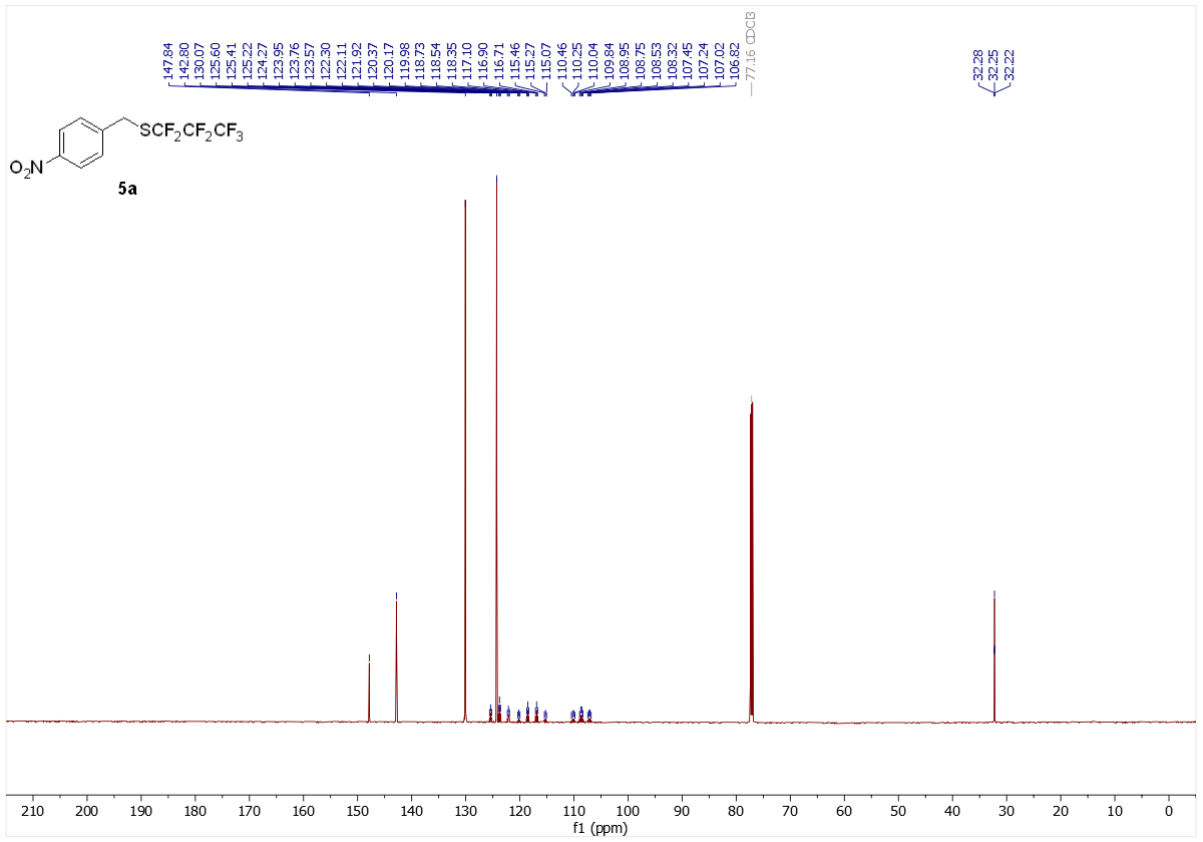

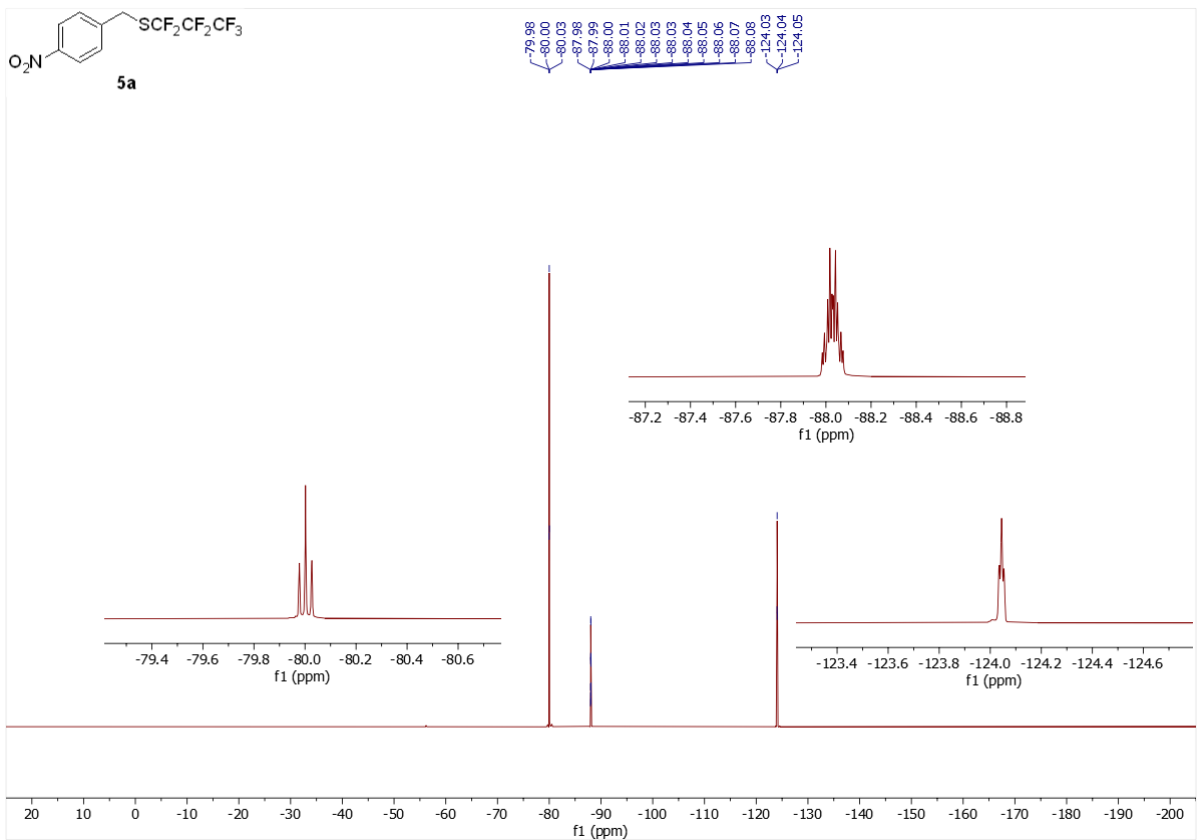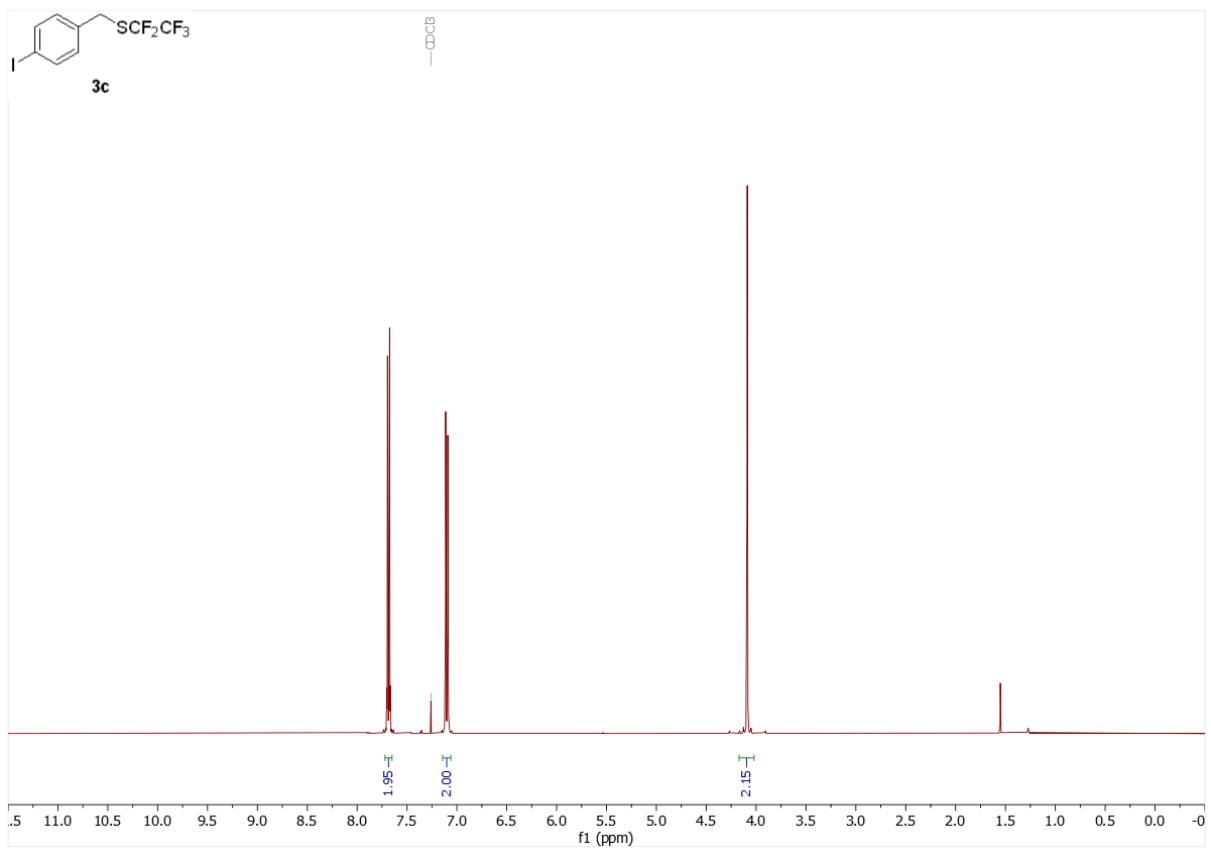

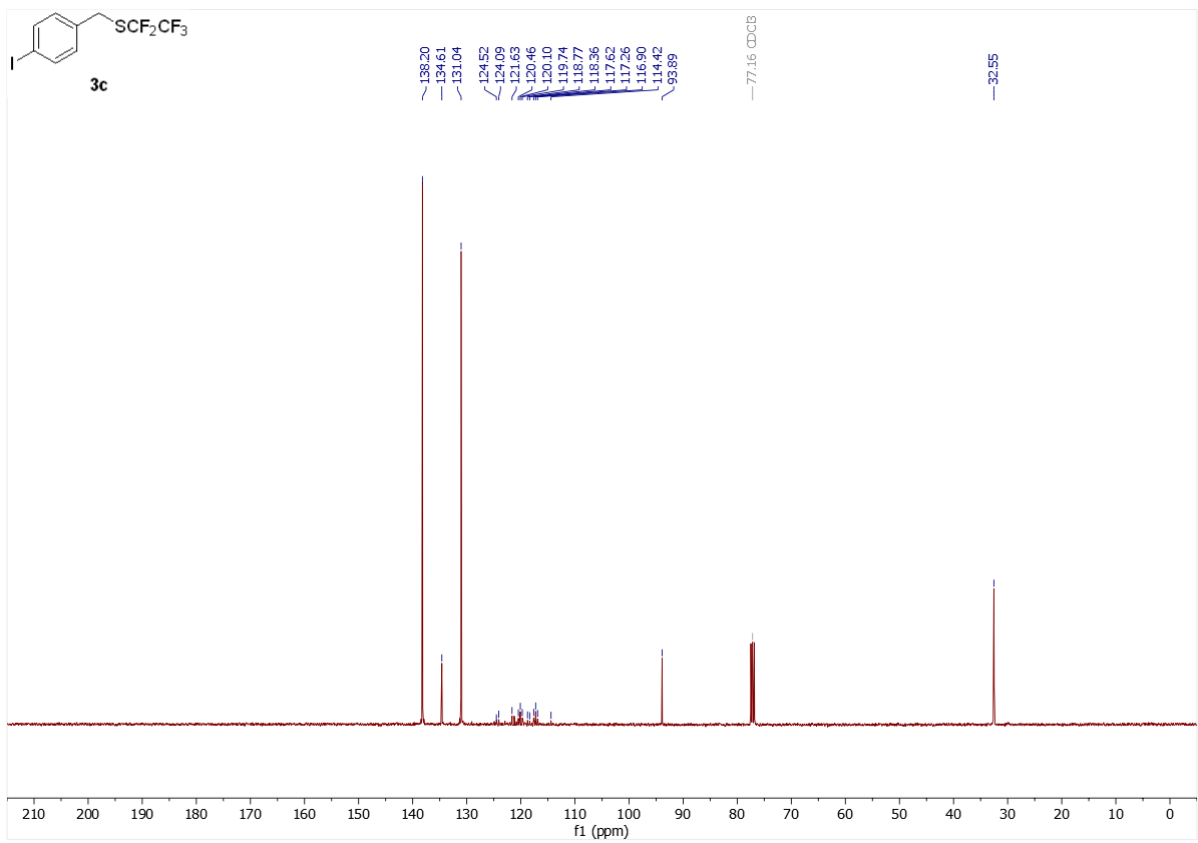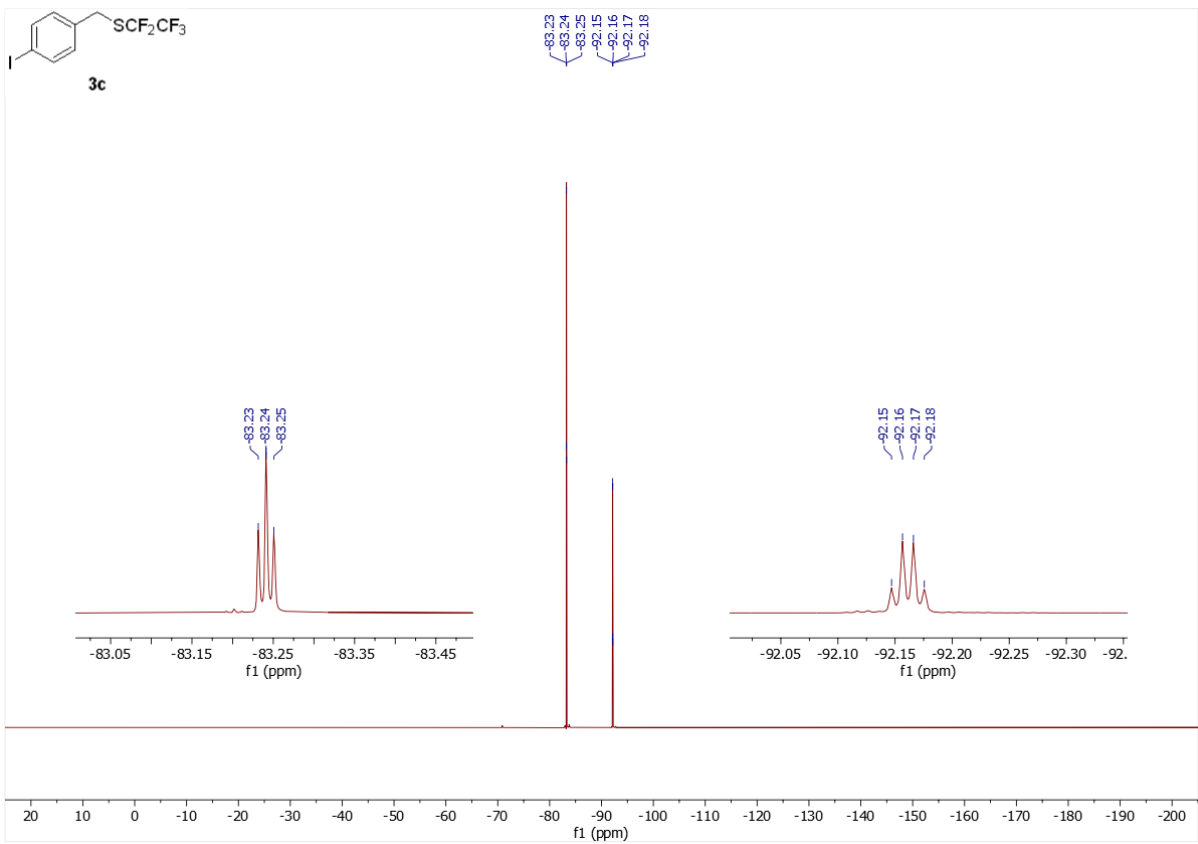



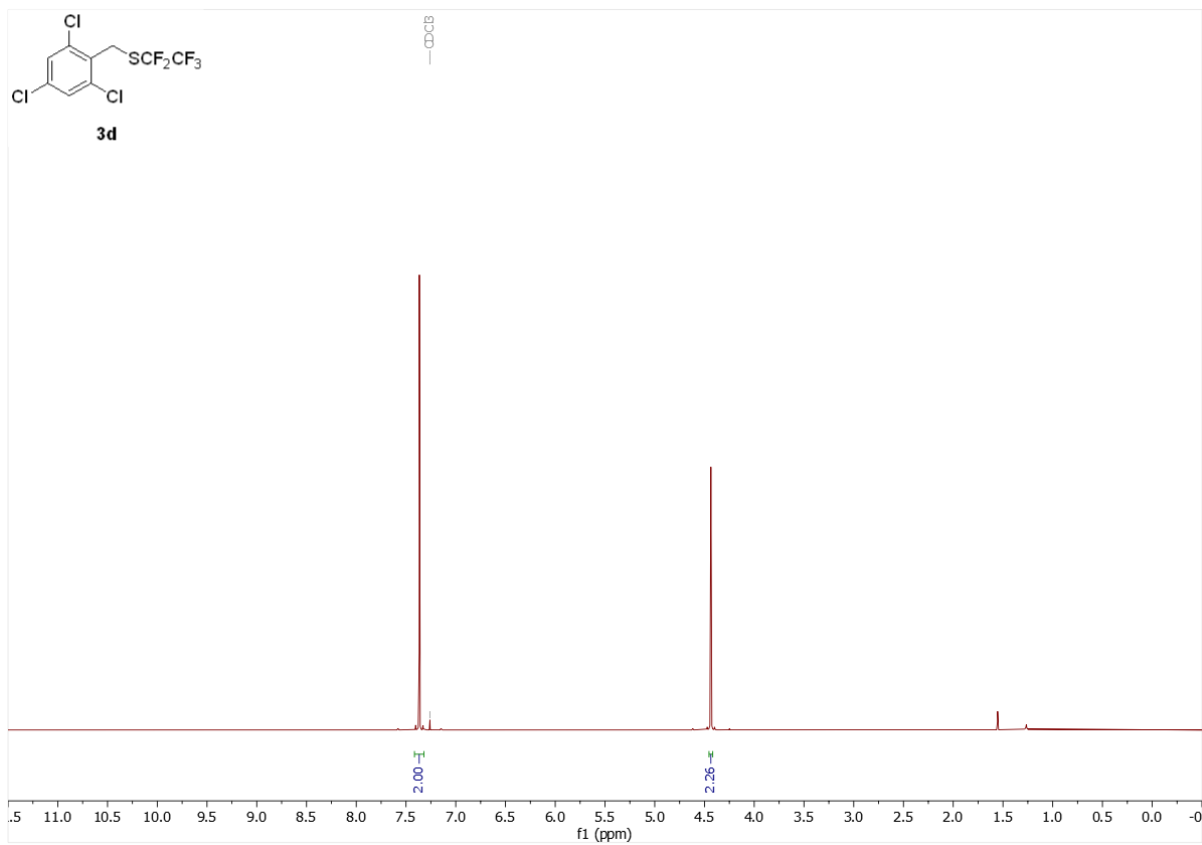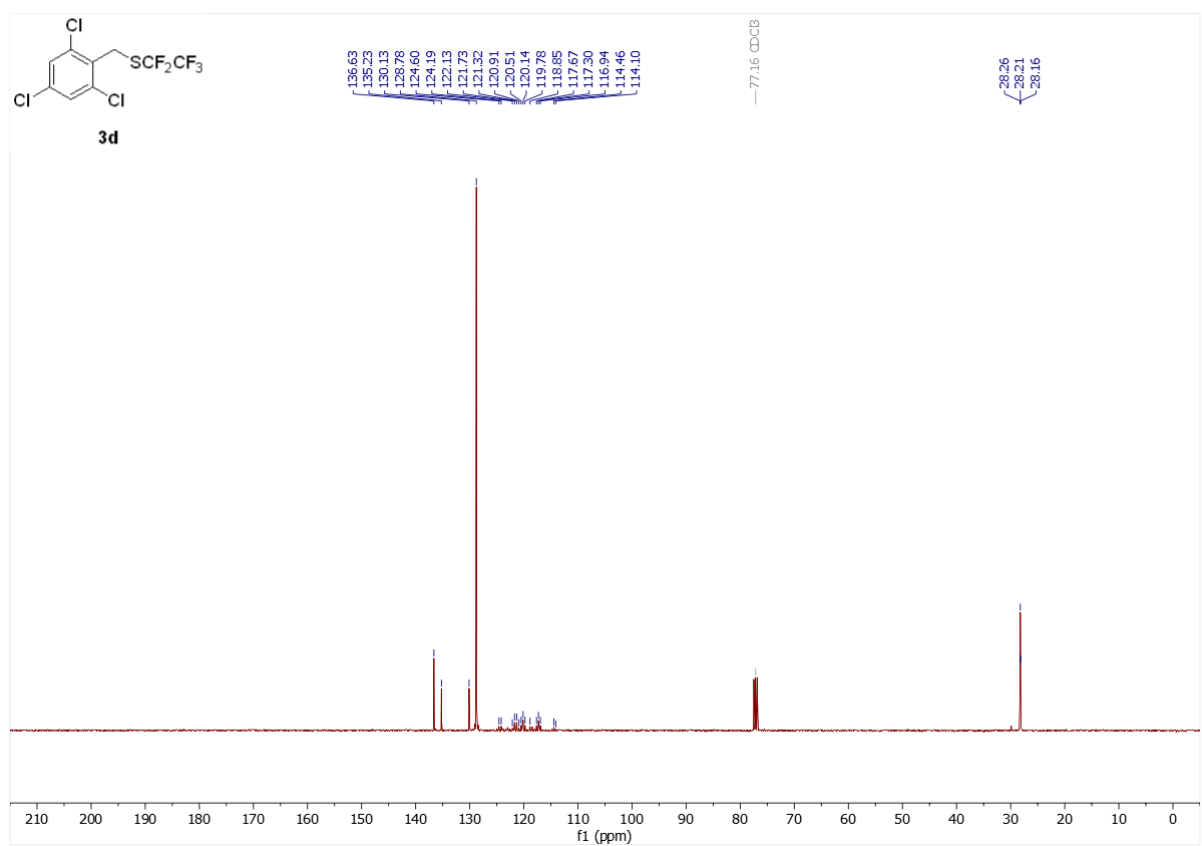

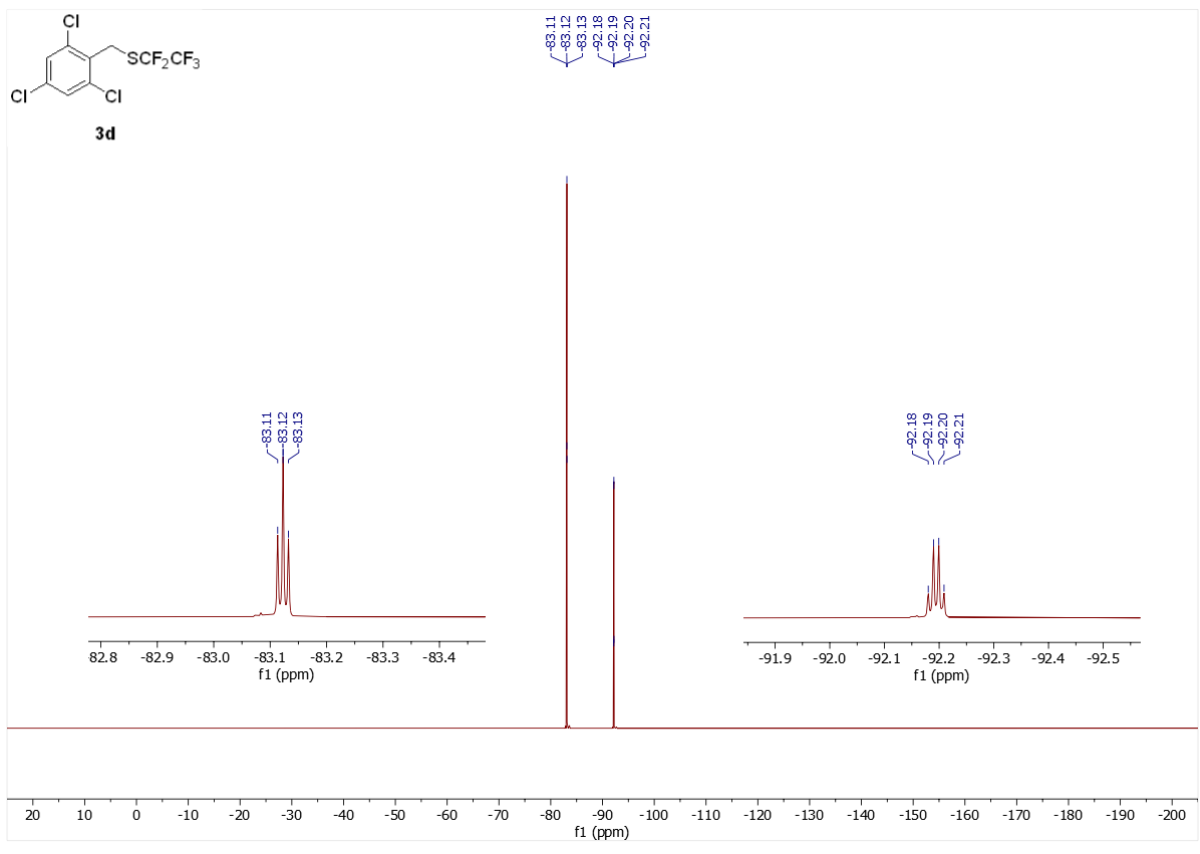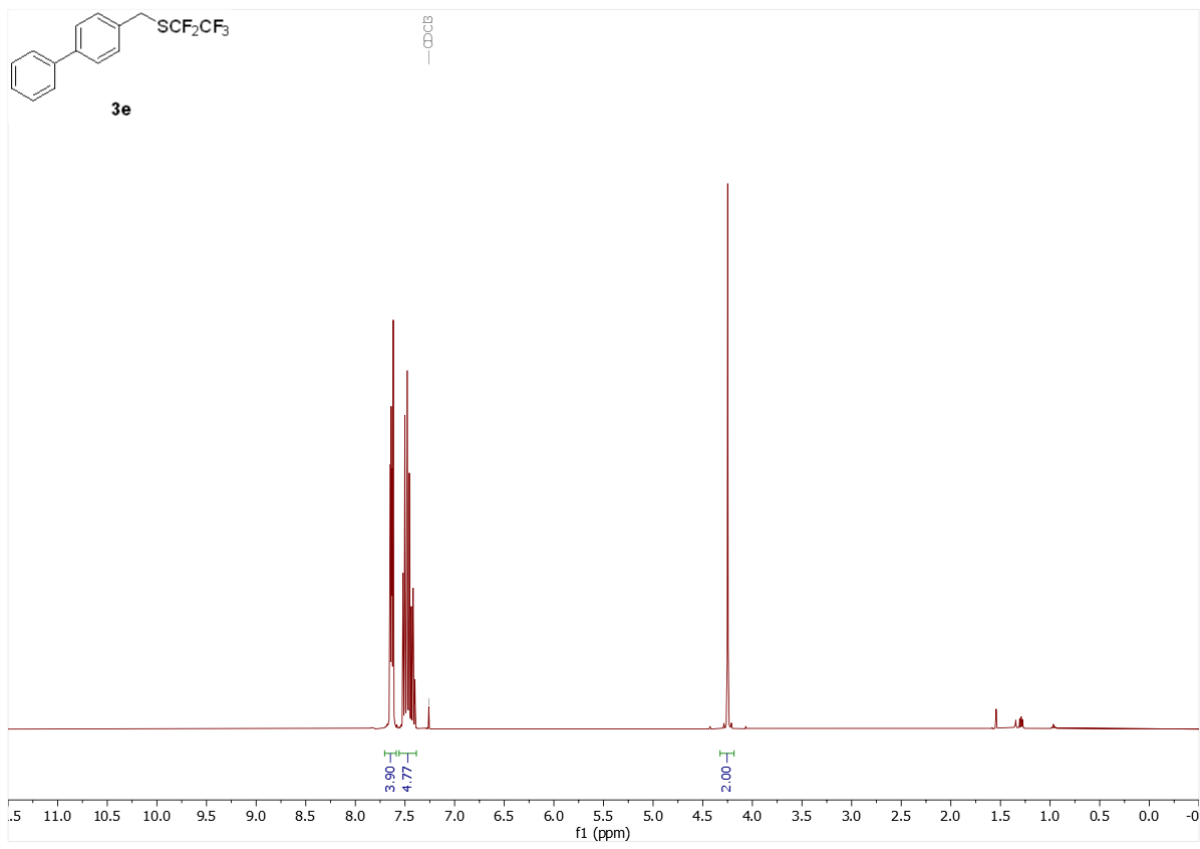

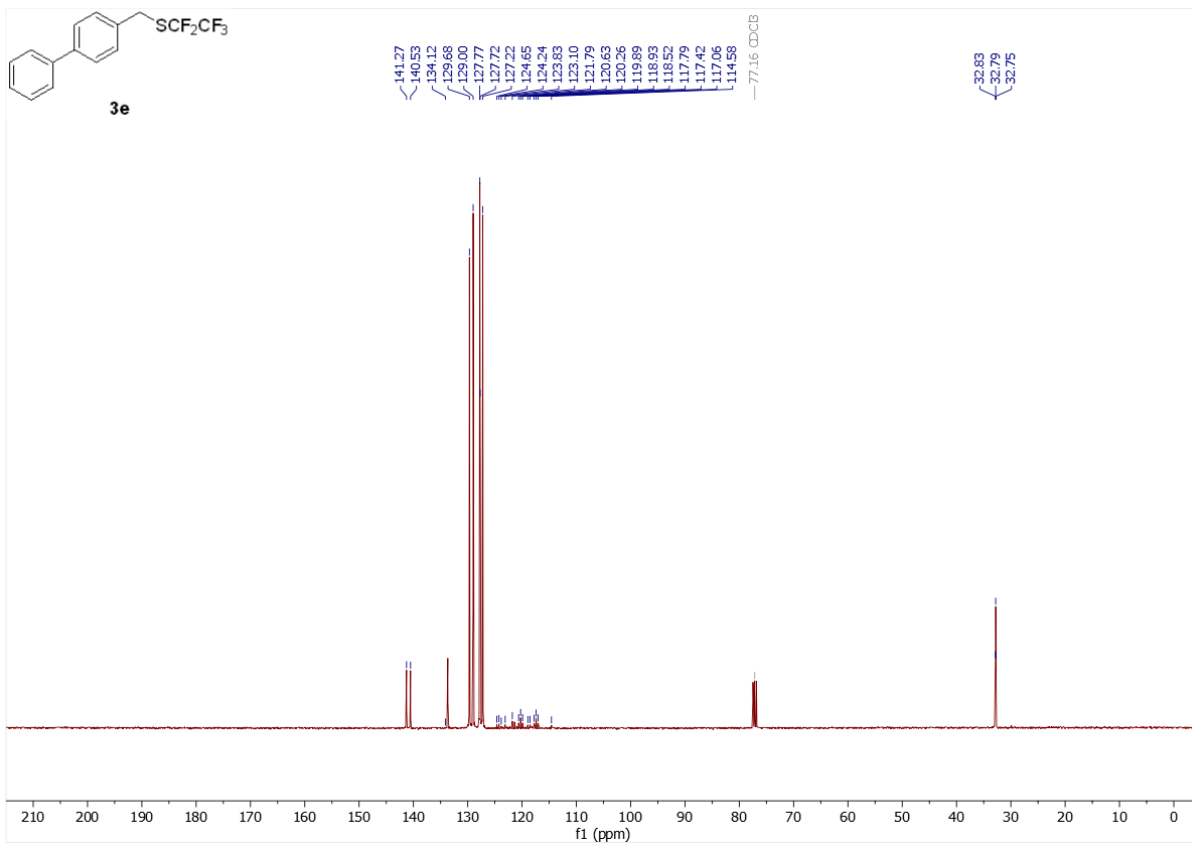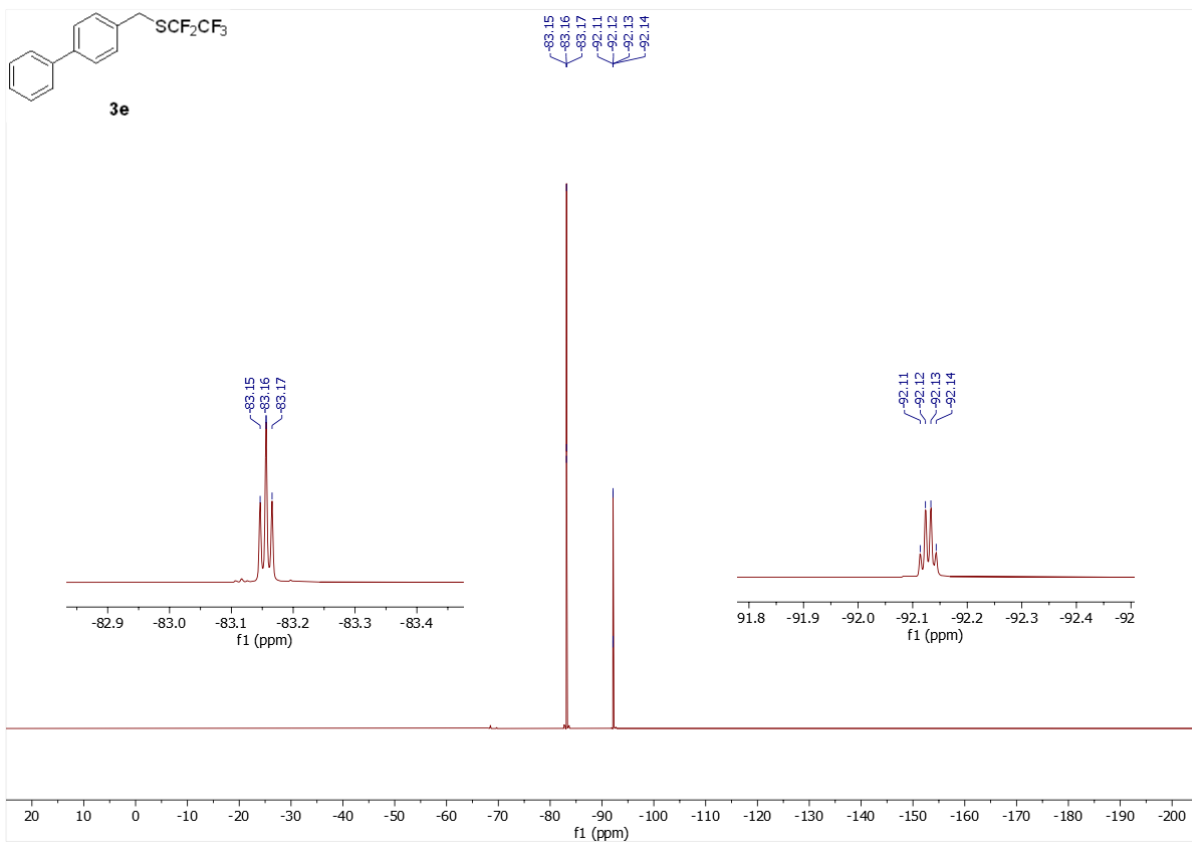

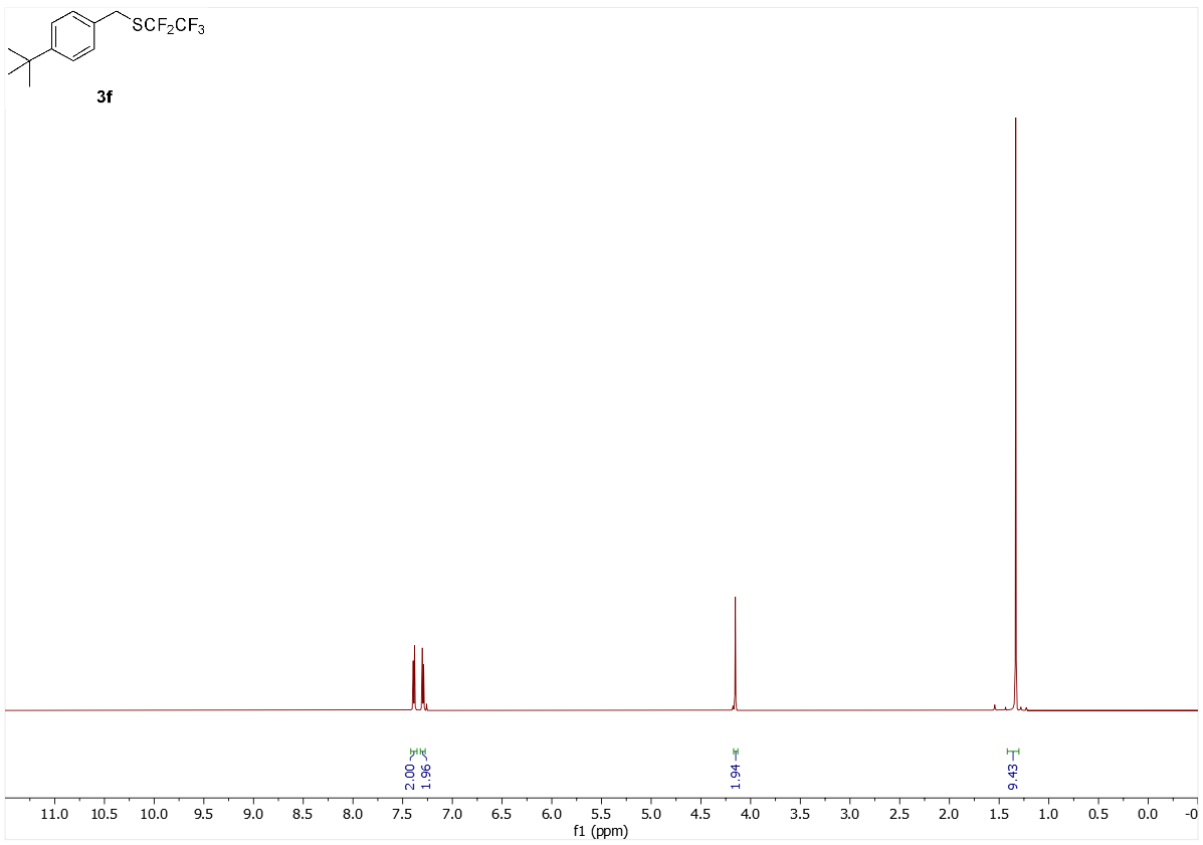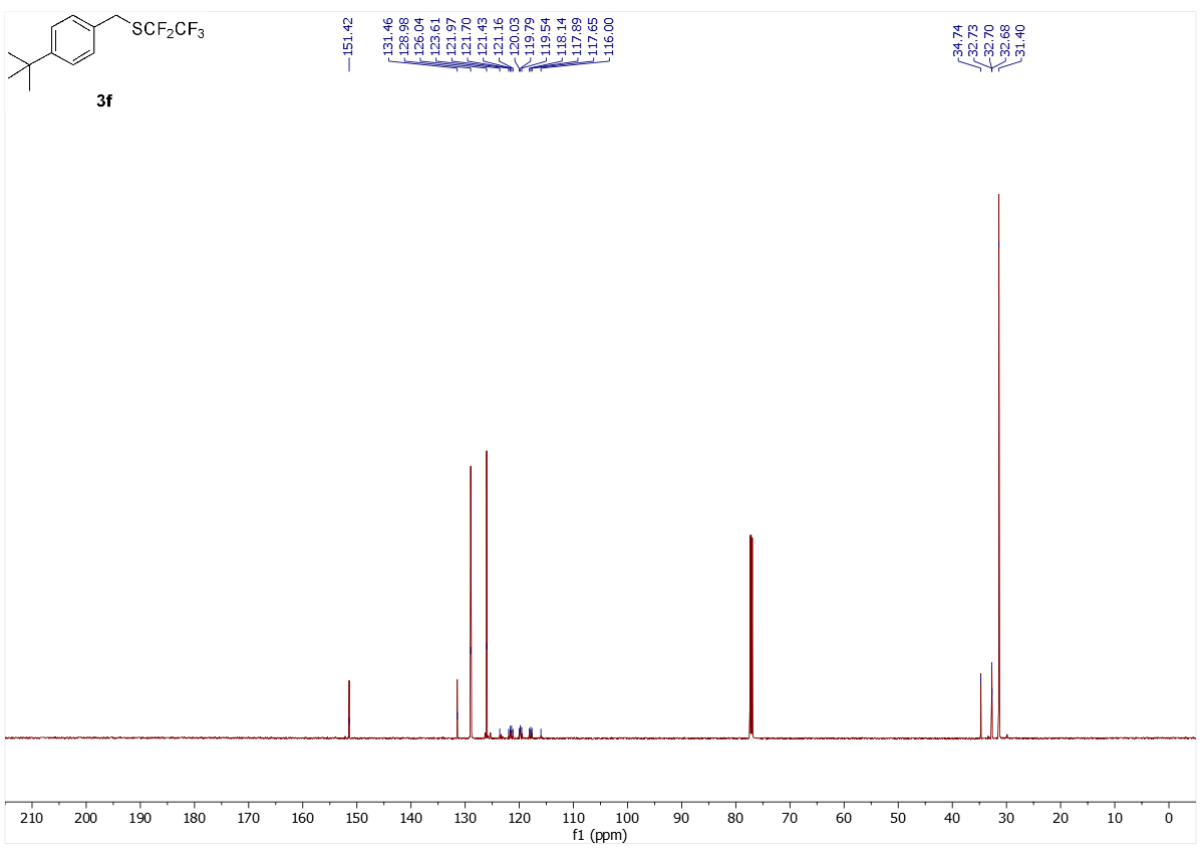

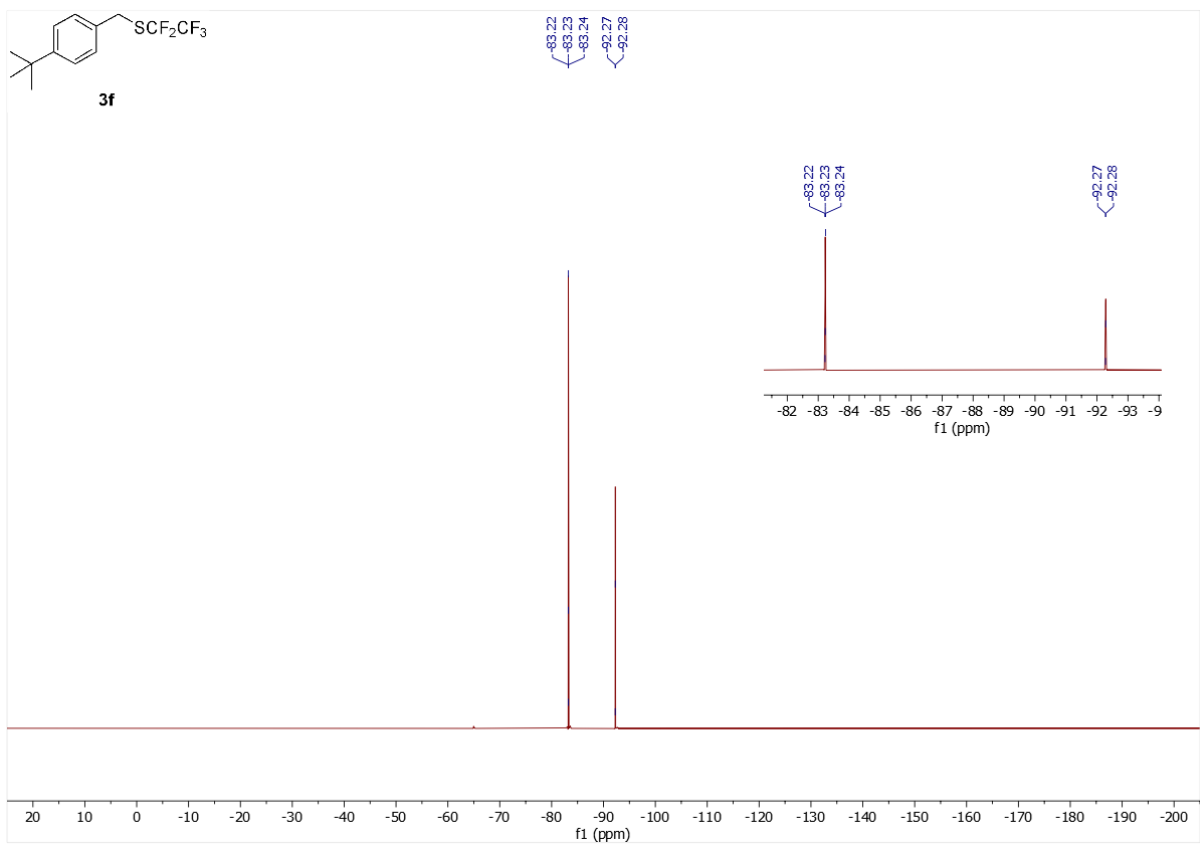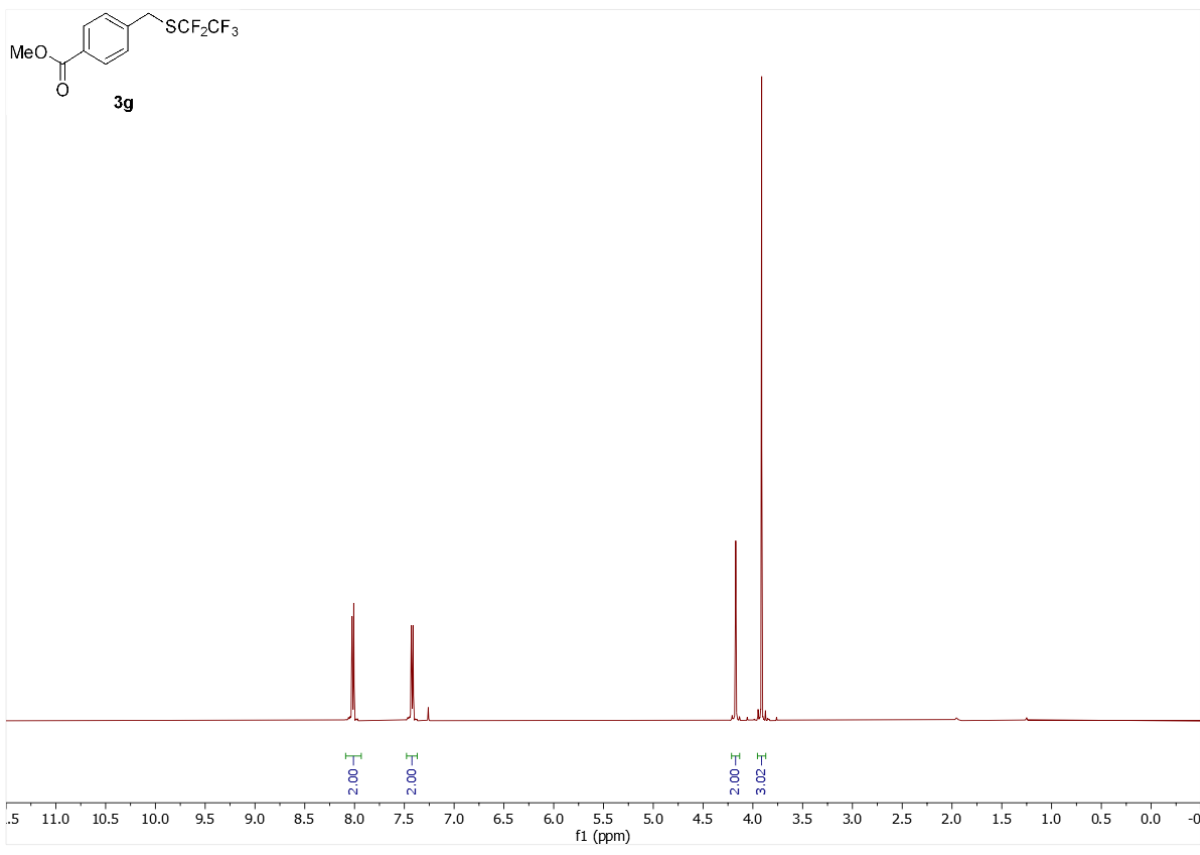

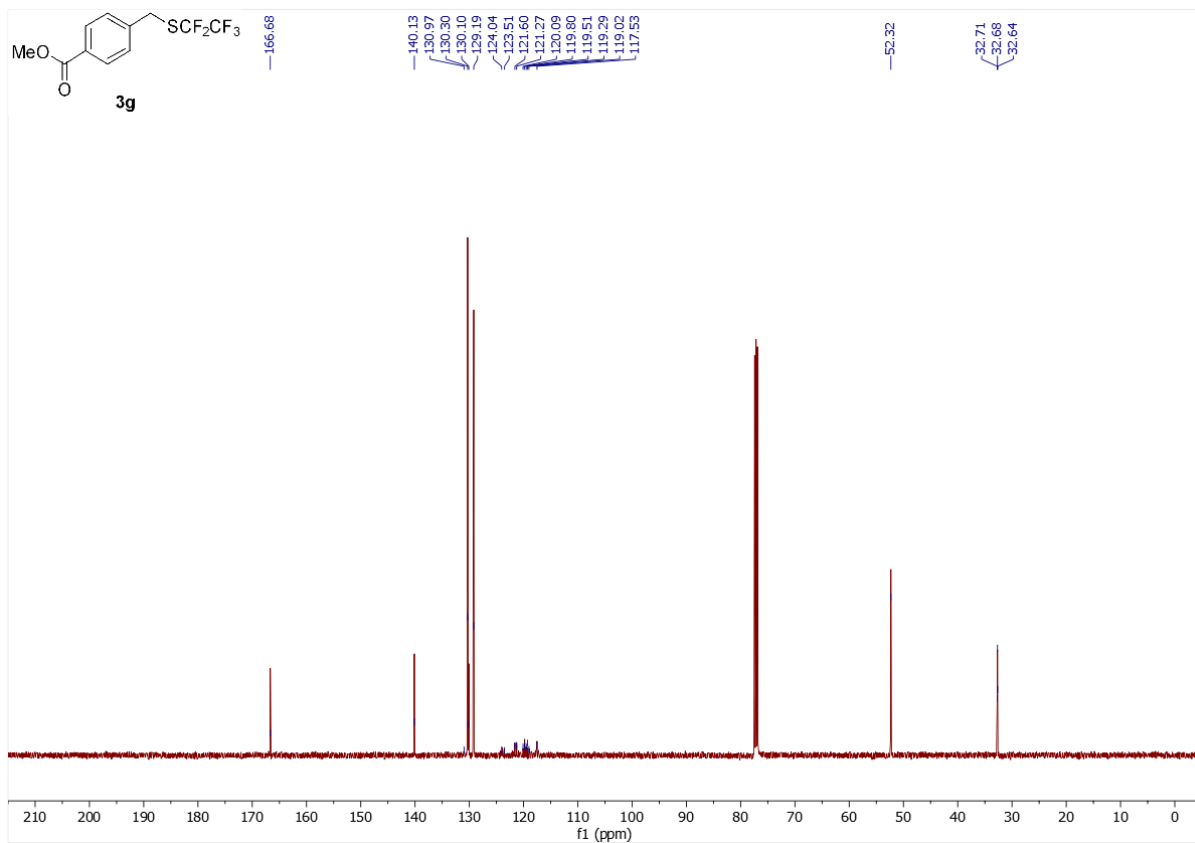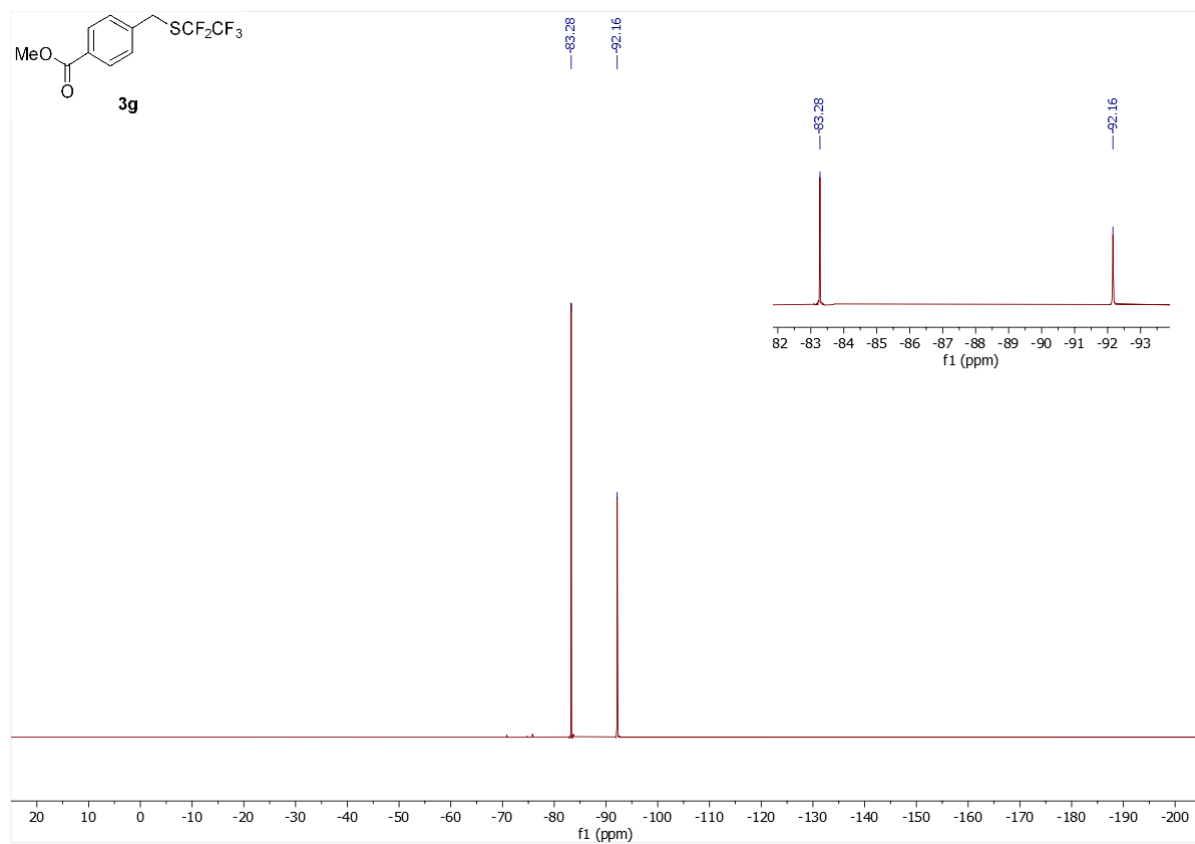

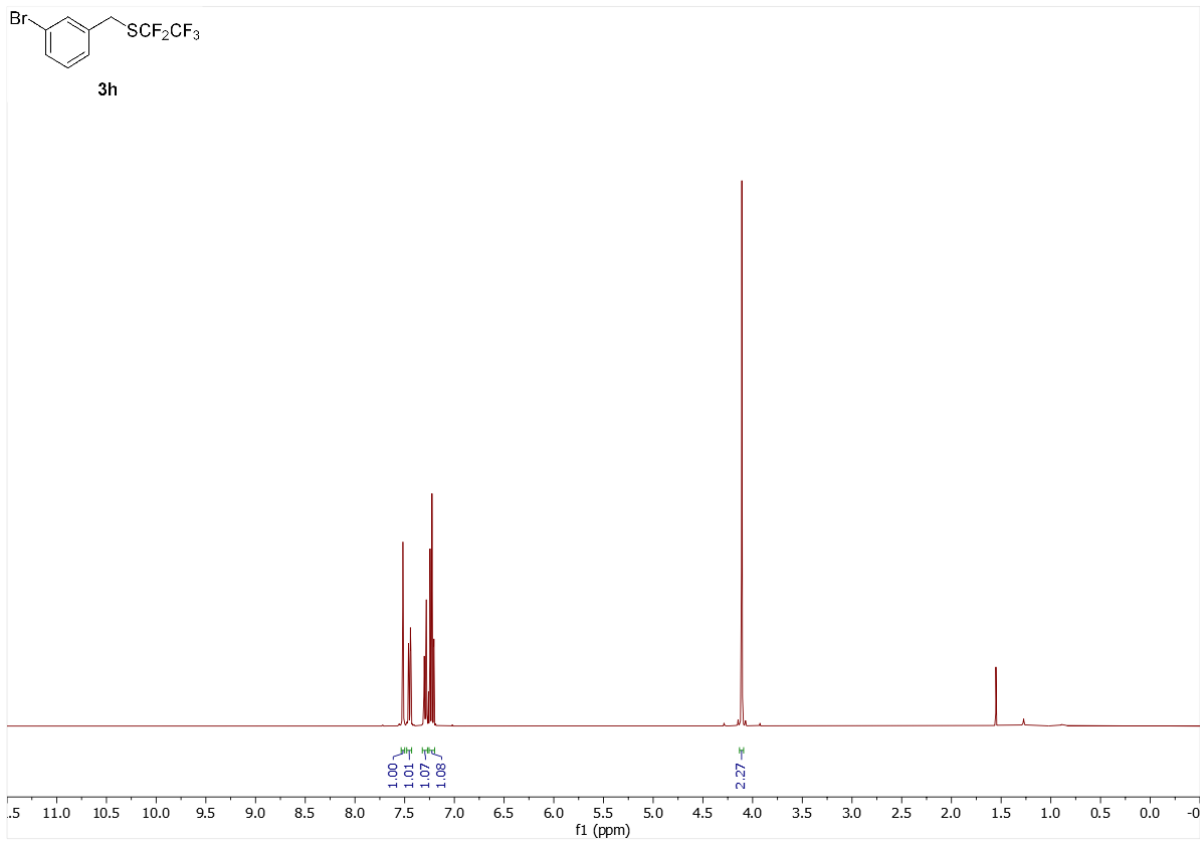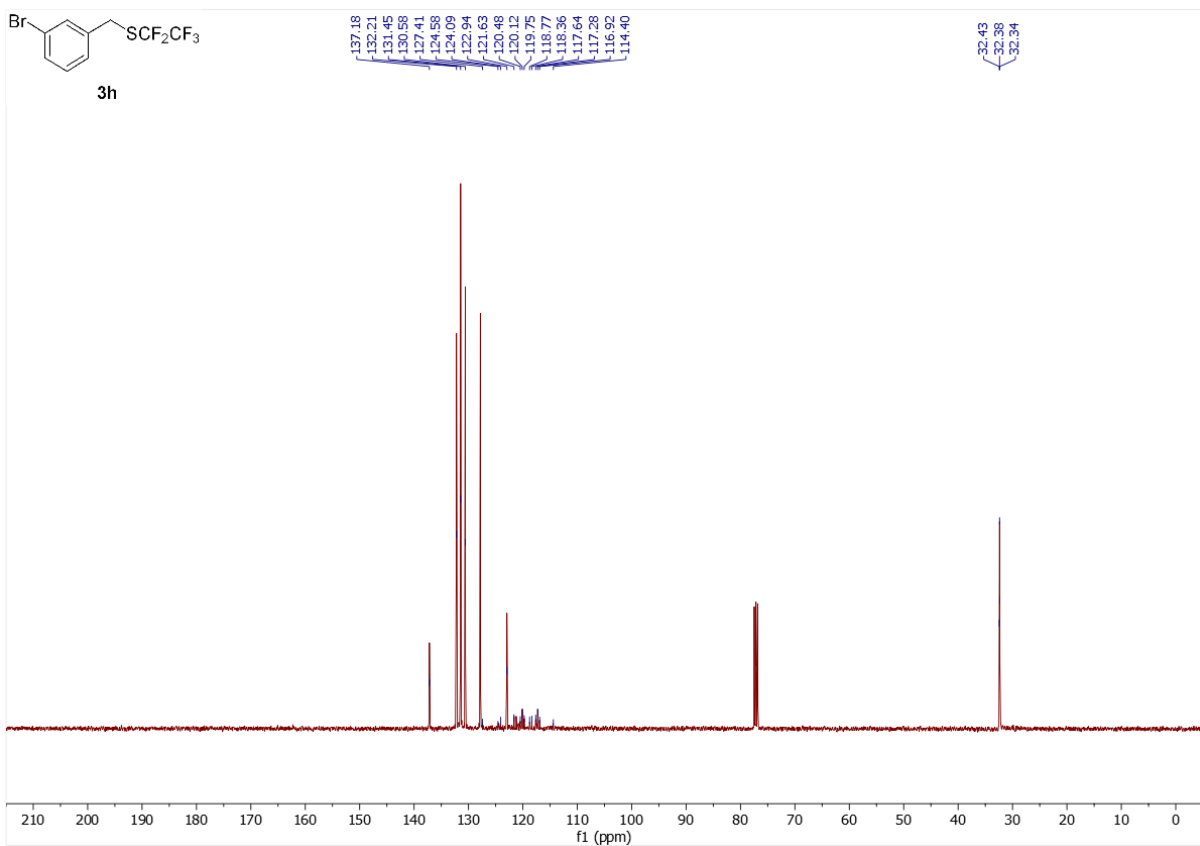

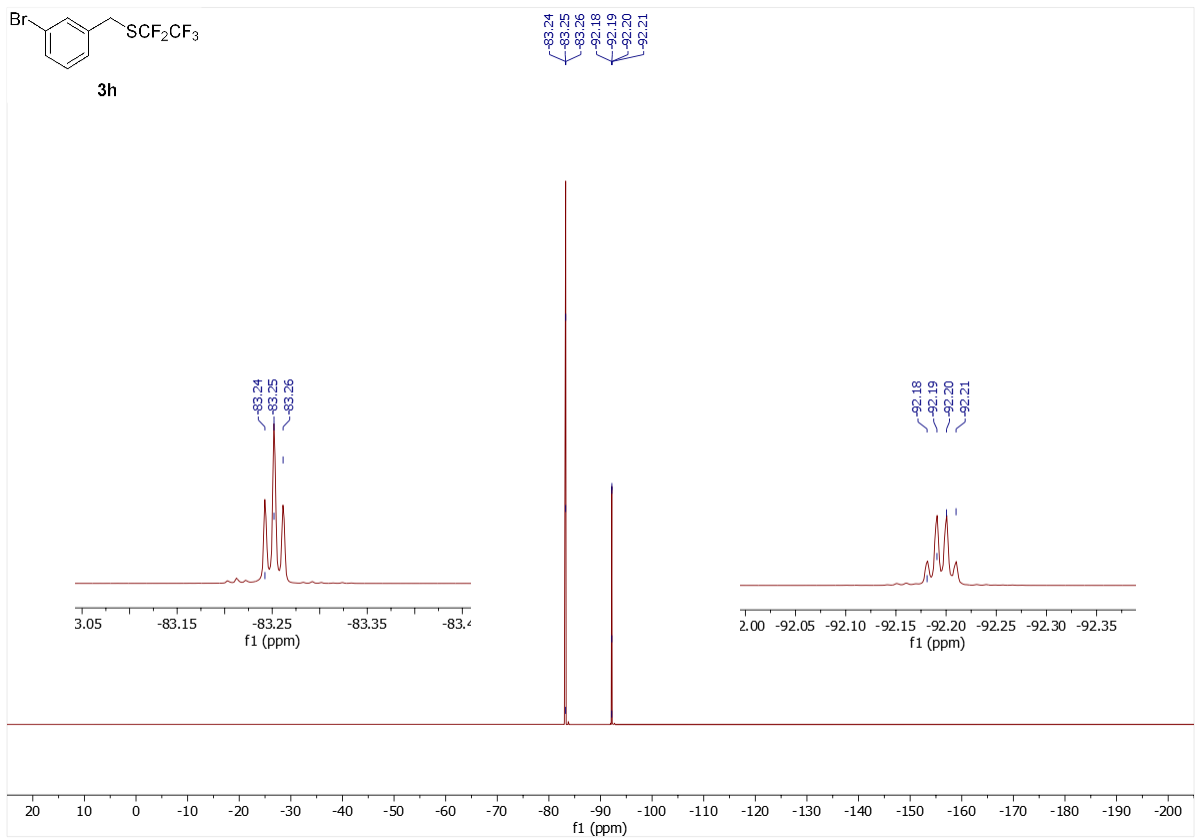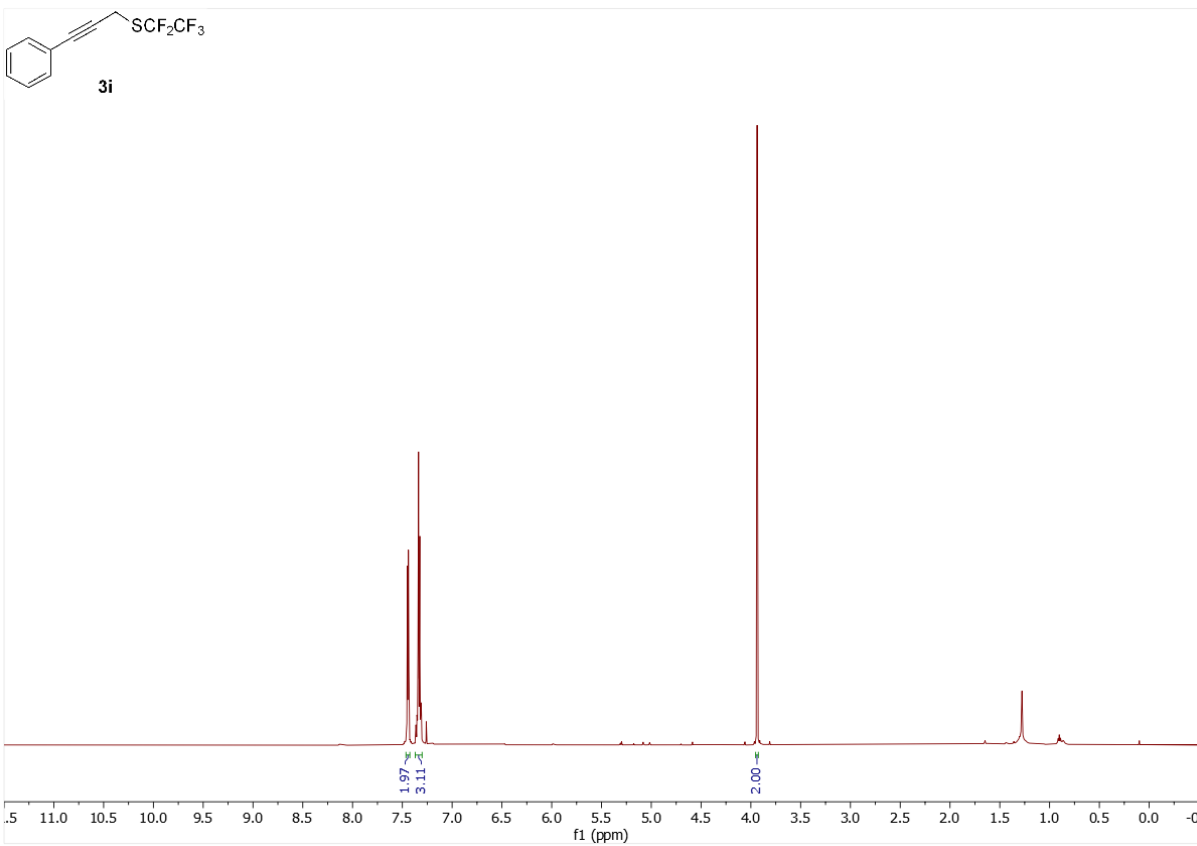



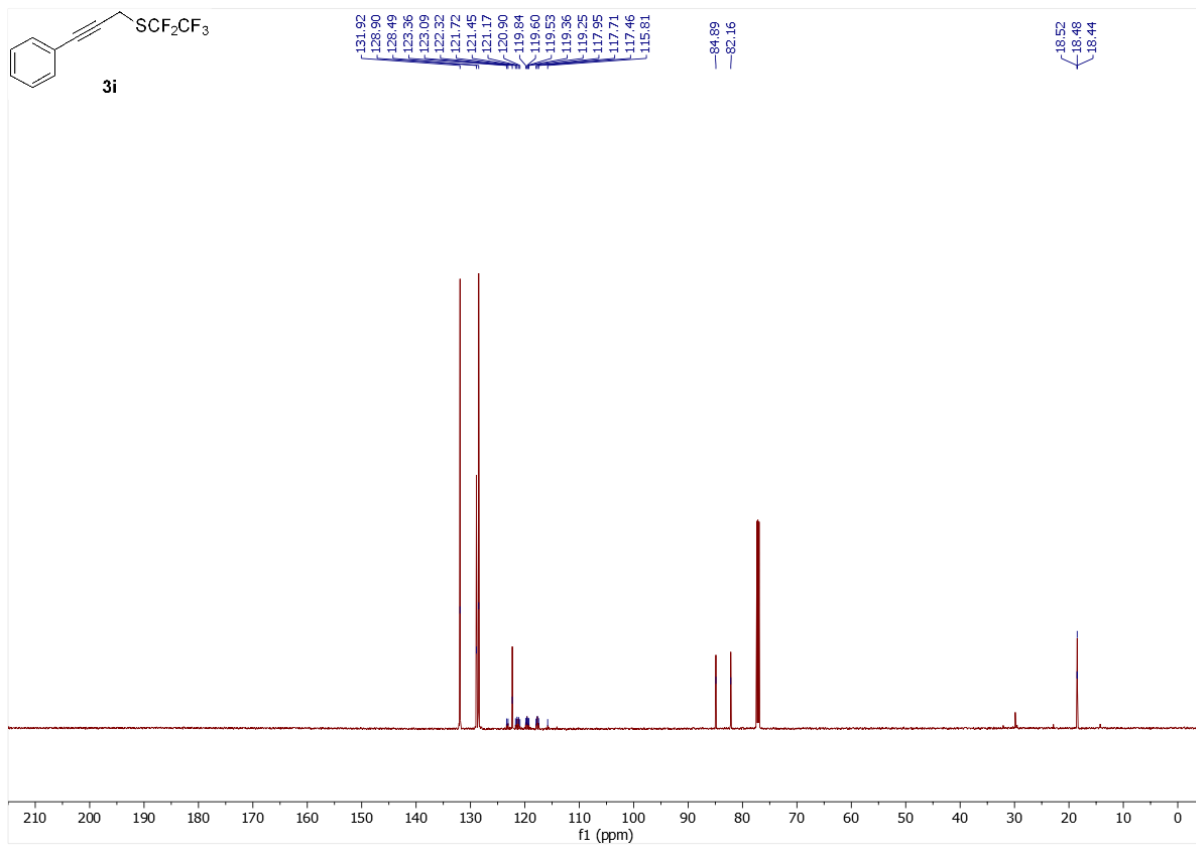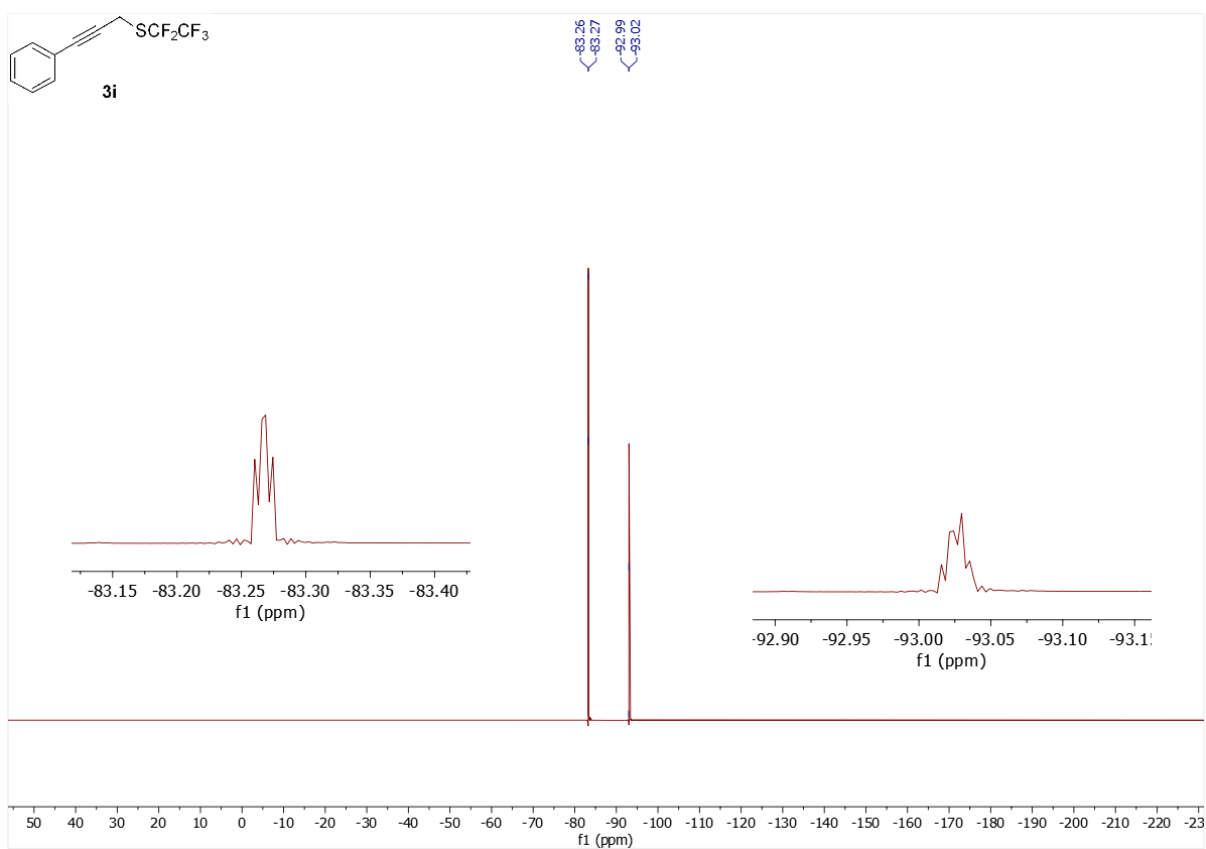

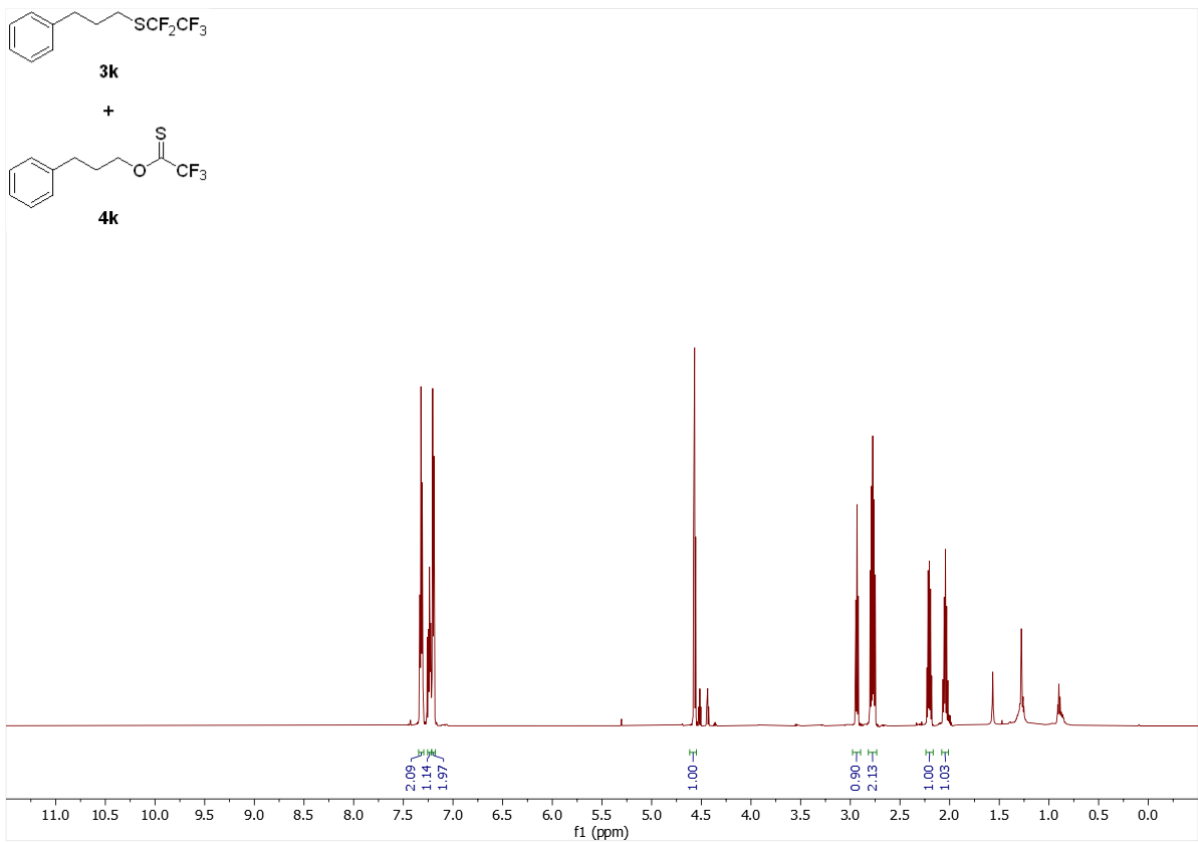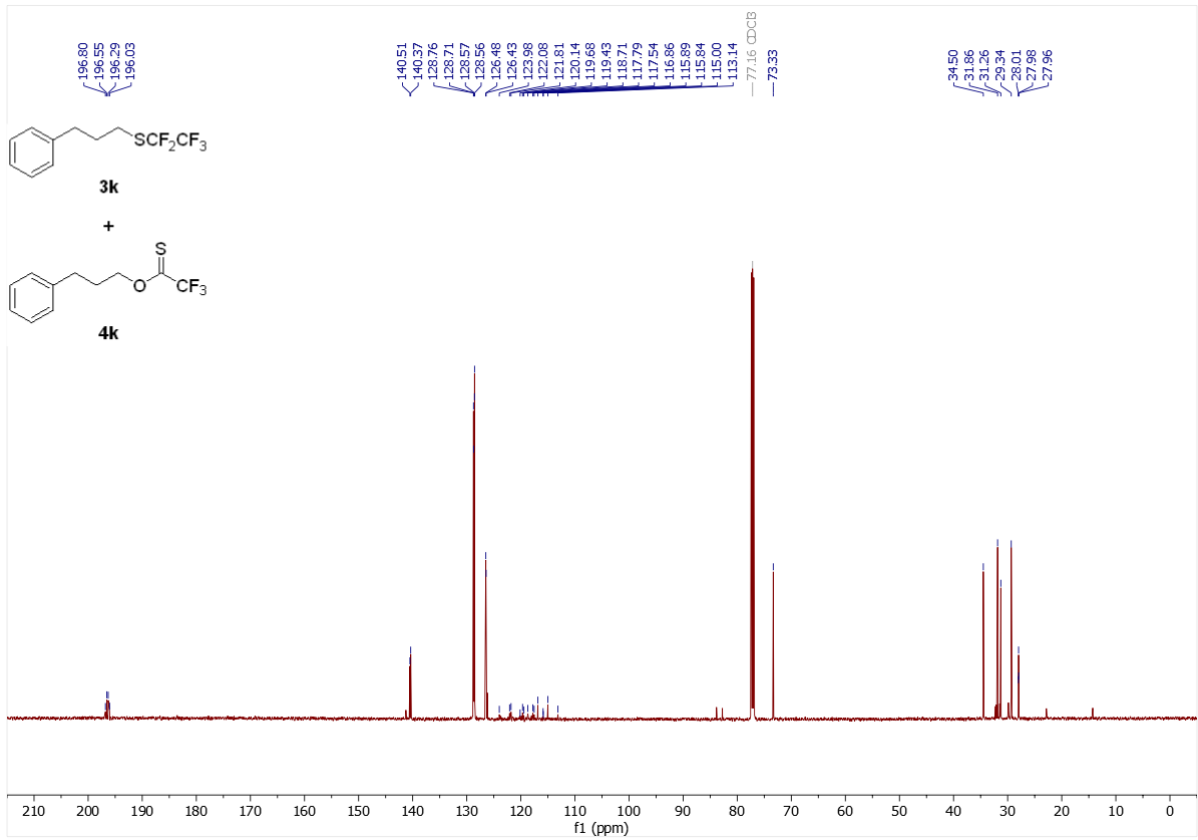

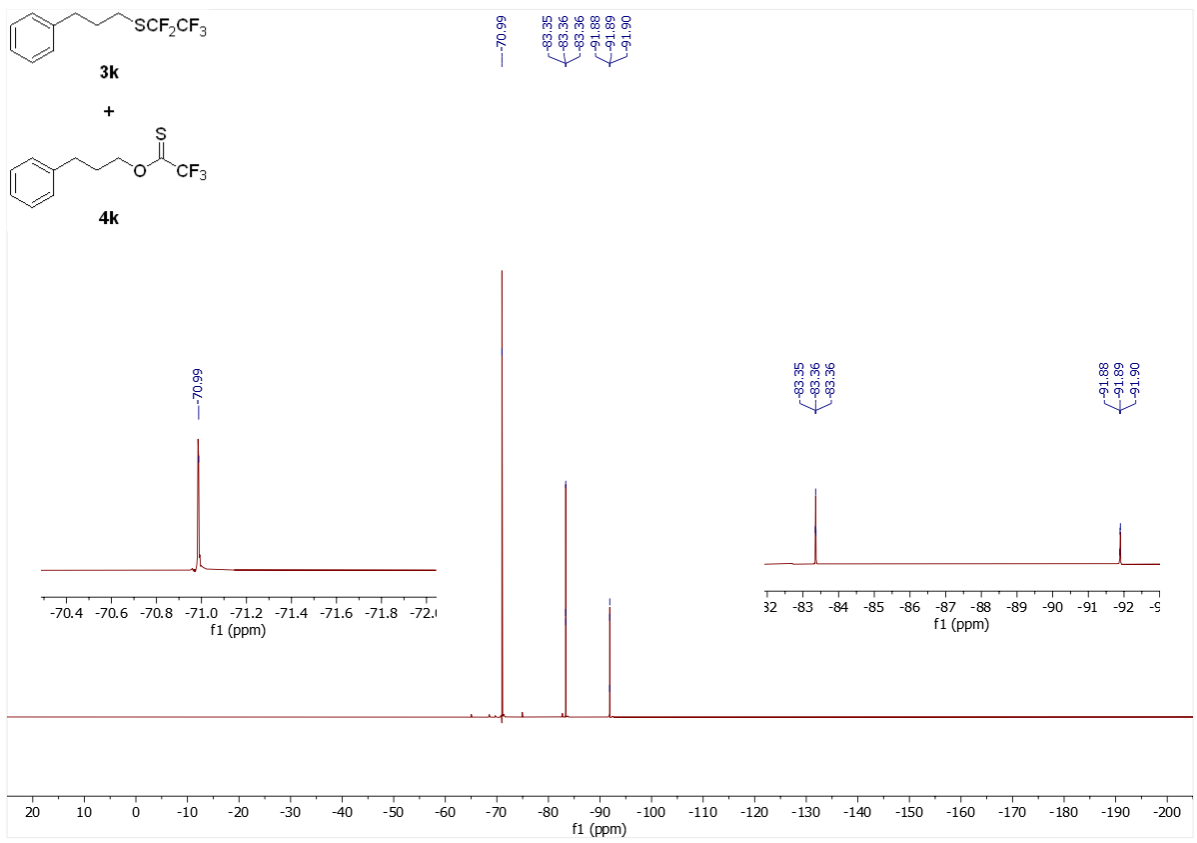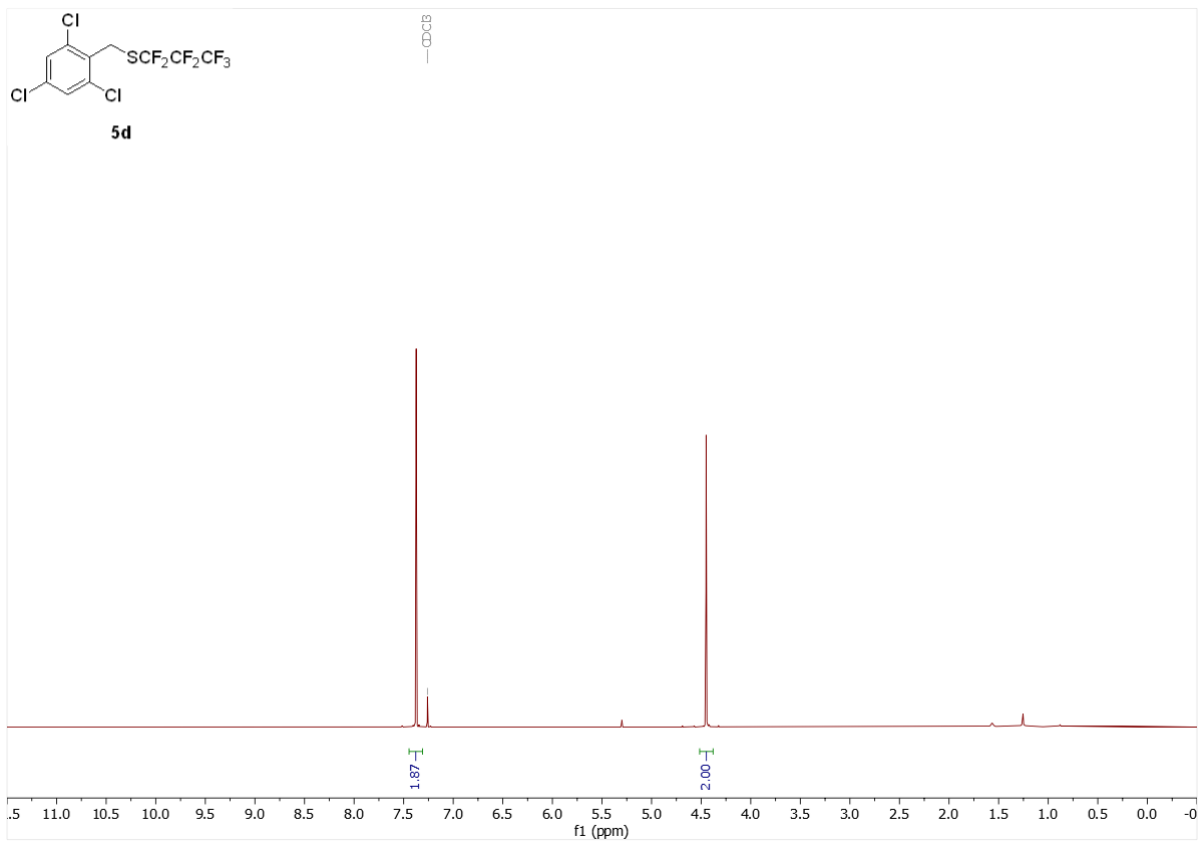



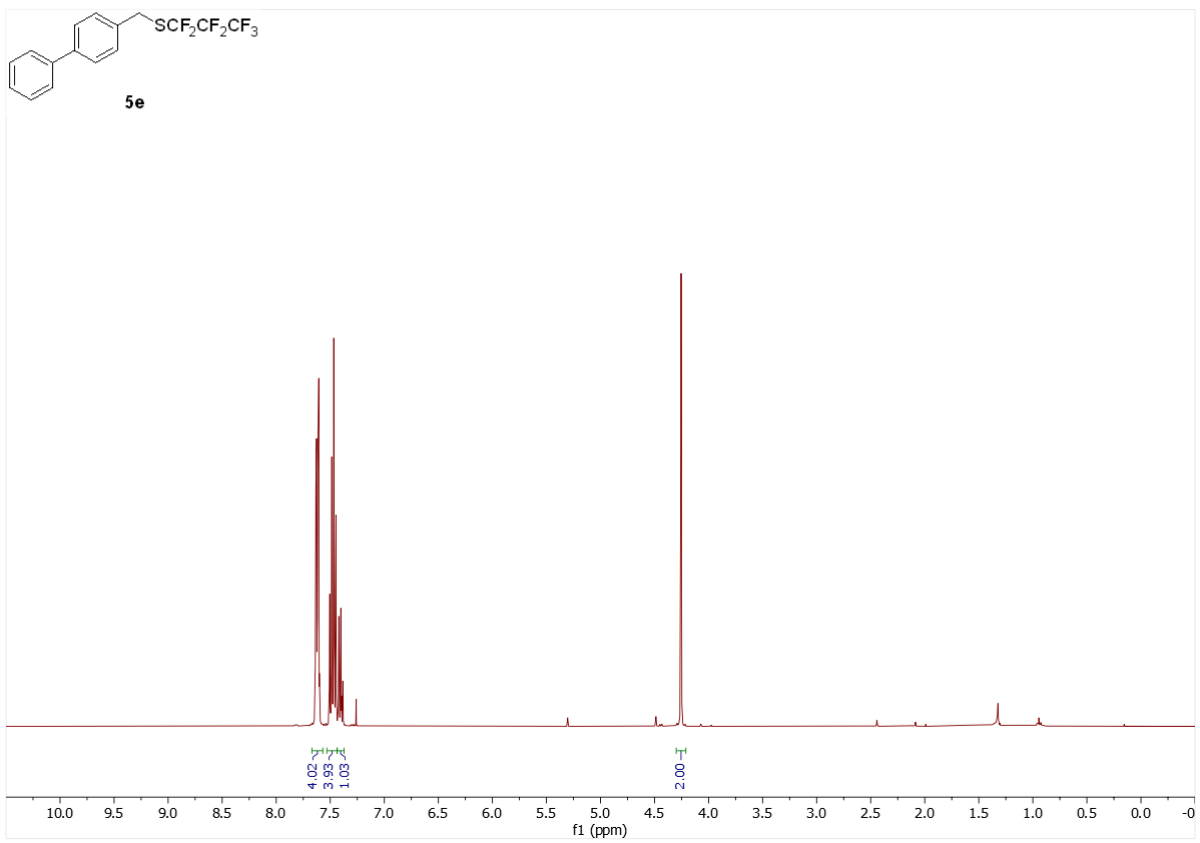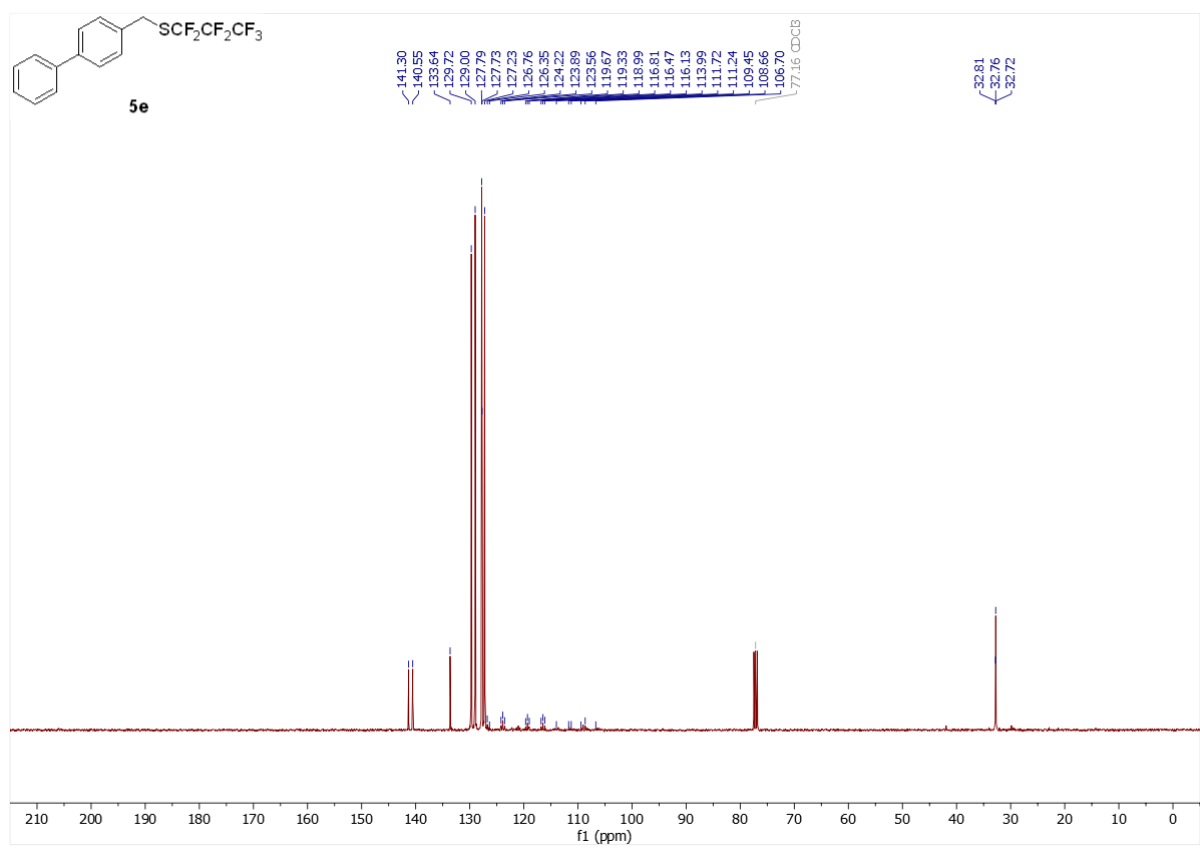

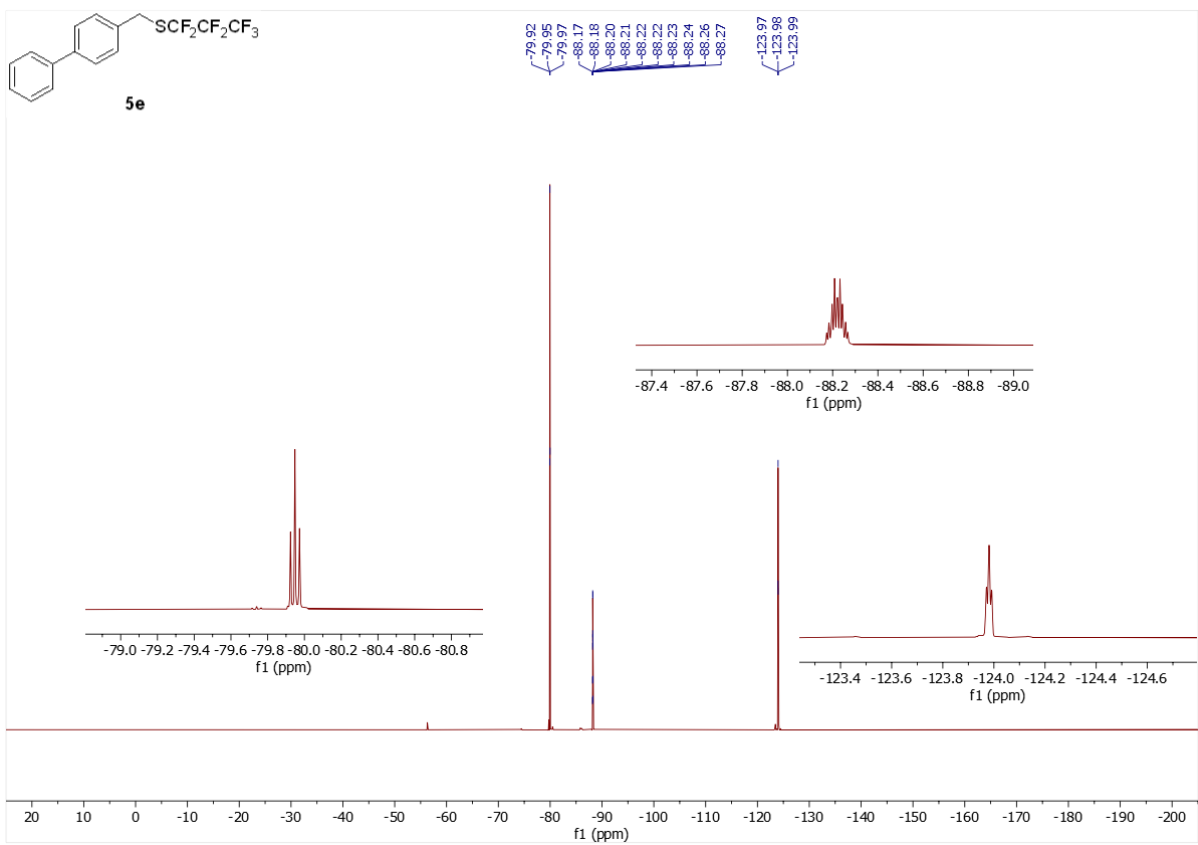

Supplement: Additional file 1 [file 1860-5397-17-8-S1.pdf]
